# Supplementary material for: Maternal trauma due to motor vehicle crashes and pregnancy outcomes: a systematic review and meta-analysis
Source: PubMed Central journal article supplement — BMJ Open. 2020 Oct 5;10(10):e035562. doi: 10.1136/bmjopen-2019-035562 (PMC7537450; doi:10.1136/bmjopen-2019-035562), 2020-10-05
Supplement: bmjopen-2019-035562.draft_revisions.pdf [file bmjopen-2019-035562.draft_revisions.pdf]

# BMJ Open

BMJ Open is committed to open peer review. As part of this commitment we make the peer review history of every article we publish publicly available.

When an article is published we post the peer reviewers' comments and the authors' responses online. We also post the versions of the paper that were used during peer review. These are the versions that the peer review comments apply to.

The versions of the paper that follow are the versions that were submitted during the peer review process. They are not the versions of record or the final published versions. They should not be cited or distributed as the published version of this manuscript.

BMJ Open is an open access journal and the full, final, typeset and author-corrected version of record of the manuscript is available on our site with no access controls, subscription charges or pay-per-view fees (<http://bmjopen.bmj.com>).

If you have any questions on BMJ Open's open peer review process please email [info.bmjopen@bmj.com](mailto:info.bmjopen@bmj.com)

# BMJ Open

## Maternal trauma due to motor vehicle crashes and pregnancy outcomes: A systematic review and meta-analysis

|                               |                                                                                                                                                                                                                                                                                                                                                                                                                                                                                                                                                                                                                                                                                                                                                                                                                                                                                                                                                                                                                                                                                                                                                                                                          |
|-------------------------------|----------------------------------------------------------------------------------------------------------------------------------------------------------------------------------------------------------------------------------------------------------------------------------------------------------------------------------------------------------------------------------------------------------------------------------------------------------------------------------------------------------------------------------------------------------------------------------------------------------------------------------------------------------------------------------------------------------------------------------------------------------------------------------------------------------------------------------------------------------------------------------------------------------------------------------------------------------------------------------------------------------------------------------------------------------------------------------------------------------------------------------------------------------------------------------------------------------|
| Journal:                      | <i>BMJ Open</i>                                                                                                                                                                                                                                                                                                                                                                                                                                                                                                                                                                                                                                                                                                                                                                                                                                                                                                                                                                                                                                                                                                                                                                                          |
| Manuscript ID                 | bmjopen-2019-035562                                                                                                                                                                                                                                                                                                                                                                                                                                                                                                                                                                                                                                                                                                                                                                                                                                                                                                                                                                                                                                                                                                                                                                                      |
| Article Type:                 | Original research                                                                                                                                                                                                                                                                                                                                                                                                                                                                                                                                                                                                                                                                                                                                                                                                                                                                                                                                                                                                                                                                                                                                                                                        |
| Date Submitted by the Author: | 05-Nov-2019                                                                                                                                                                                                                                                                                                                                                                                                                                                                                                                                                                                                                                                                                                                                                                                                                                                                                                                                                                                                                                                                                                                                                                                              |
| Complete List of Authors:     | Amezcu-Prieto, Carmen; University of Granada, Department of Preventive Medicine and Public Health, School of Medicine<br>Ross, Jennifer; Centre for Trauma Sciences, Blizard Institute, Barts and the London School of Medicine and Dentistry<br>Rogozińska, Ewelina; Queen Mary University of London, Women's Health Research Unit, Barts and the London School of Medicine and Dentistry, Queen Mary University of London; Meta-analysis Group, MRC Clinical Trials Unit, University College London, London, United Kingdom<br>Mighiu, Patricia; Queen Mary University of London, Yvonne Carter Building, E12AB London, United Kingdom<br>Martínez-Ruiz, Virginia; University of Granada, Preventive Medicine and Public Health<br>Brohi, Karim; Queen Mary University of London, Centre for Trauma Sciences; Barts Health NHS Trust<br>Bueno Cavanillas, Aurora; Universidad de Granada, Medicina Preventiva y Salud Pública<br>Khan, Khalid; Queen Mary, University of London, Centre for Primary Care and Public Health<br>Thangaratinam, Shakila; Birmingham Womens Hospital; Queen Mary University of London, Women's Health Research Unit, Barts and the London School of Medicine and Dentistry |
| Keywords:                     | ACCIDENT & EMERGENCY MEDICINE, EPIDEMIOLOGY, OBSTETRICS                                                                                                                                                                                                                                                                                                                                                                                                                                                                                                                                                                                                                                                                                                                                                                                                                                                                                                                                                                                                                                                                                                                                                  |
|                               |                                                                                                                                                                                                                                                                                                                                                                                                                                                                                                                                                                                                                                                                                                                                                                                                                                                                                                                                                                                                                                                                                                                                                                                                          |

SCHOLARONE™  
Manuscripts

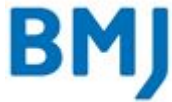

I, the Submitting Author has the right to grant and does grant on behalf of all authors of the Work (as defined in the below author licence), an exclusive licence and/or a non-exclusive licence for contributions from authors who are: i) UK Crown employees; ii) where BMJ has agreed a CC-BY licence shall apply, and/or iii) in accordance with the terms applicable for US Federal Government officers or employees acting as part of their official duties; on a worldwide, perpetual, irrevocable, royalty-free basis to BMJ Publishing Group Ltd ("BMJ") its licensees and where the relevant Journal is co-owned by BMJ to the co-owners of the Journal, to publish the Work in this journal and any other BMJ products and to exploit all rights, as set out in our [licence](#).

The Submitting Author accepts and understands that any supply made under these terms is made by BMJ to the Submitting Author unless you are acting as an employee on behalf of your employer or a postgraduate student of an affiliated institution which is paying any applicable article publishing charge ("APC") for Open Access articles. Where the Submitting Author wishes to make the Work available on an Open Access basis (and intends to pay the relevant APC), the terms of reuse of such Open Access shall be governed by a Creative Commons licence – details of these licences and which [Creative Commons](#) licence will apply to this Work are set out in our licence referred to above.

Other than as permitted in any relevant BMJ Author's Self Archiving Policies, I confirm this Work has not been accepted for publication elsewhere, is not being considered for publication elsewhere and does not duplicate material already published. I confirm all authors consent to publication of this Work and authorise the granting of this licence.

1  
2  
3 **Maternal trauma due to motor vehicle crashes and pregnancy outcomes: A systematic review**  
4 **and meta-analysis**  
5  
6  
7

8 *Amezcu-Prieto C<sup>1,2,3</sup>, Ross J<sup>4</sup>, Rogozińska E,<sup>5,6</sup> Mighiu P<sup>5</sup>, Martínez-Ruiz V<sup>1,2,3</sup>, Brohi K<sup>4</sup>, Bueno-*  
9 *Cavanillas A<sup>1,2,3\*</sup>, Khan KS<sup>5</sup>, Thangaratinam S<sup>5</sup>*  
10  
11  
12  
13

14 *<sup>1</sup>Department of Preventive Medicine and Public Health. Faculty of Medicine. University of Granada.*  
15 *Avenida de la Investigación, 11; 18071 Granada, Spain*  
16

17 *<sup>2</sup>CIBER de Epidemiología y Salud Pública. (CIBERESP), Granada, Spain*  
18

19 *<sup>3</sup>Instituto de Investigación Biosanitaria ibs.GRANADA, Granada, Spain*  
20

21 *<sup>4</sup>Centre for Trauma Sciences, Queen Mary University of London, London, United Kingdom*  
22

23 *<sup>5</sup>Women's Health Research Unit, Barts and the London School of Medicine and Dentistry, London,*  
24 *United Kingdom*

25 *<sup>6</sup>Meta-analysis Group, MRC Clinical Trials Unit, University College London, London, United*  
26 *Kingdom*  
27  
28  
29

30 **Correspondence to:**

31 **Aurora Bueno-Cavanillas, PhD, Professor**

32 Professor of Preventive Medicine and Public Health

33 Department of Preventive Medicine and Public Health, Faculty of Medicine, The University of  
34 Granada, Avenida de la Investigación, 11; 18016 Granada, Spain

35 CIBER de Epidemiología y Salud Pública. (CIBERESP), Granada, Spain,

36 Instituto de Investigación Biosanitaria ibs.GRANADA, Granada, Spain

37 Email: [abueno@ugr.es](mailto:abueno@ugr.es)  
38  
39  
40  
41  
42  
43  
44  
45  
46  
47  
48  
49  
50  
51  
52  
53  
54  
55  
56  
57  
58  
59  
60

## Abstract

### Objectives

To systematically review and quantify the effect of motor vehicle crashes (MVC) in pregnancy on maternal and offspring outcomes.

### Design

Systematic review and meta-analysis of observational data searched from inception until July 1, 2018.

### Participants

Studies were selected if they focused on the effects of exposure MVC during pregnancy vs. non-exposure, with follow up to verify outcomes in various settings, including secondary care, collision and emergency, and inpatient care.

### Data synthesis

For incidence data, we calculated a pooled estimate per 1000 women. For comparison of outcomes between women involved and those not involved in MVC, we calculated odds ratios (OR) with 95% confidence intervals (CI). Where possible, we statistically pooled the data using the random-effects model. The quality of studies used in the comparative analysis was assessed using the Newcastle-Ottawa Scale.

### Results

We included 19 studies (3,222,066 women) of which the majority was carried out in high-income countries (18/19). In population-level studies of women involved in MVC, maternal death occurred in 3.6 per 1000 (95% CI 0.25 to 10.42; 3 studies, 12,000 women; Tau= 1.77), and perinatal death in 6.6 per 1000 (95% CI 3.81 to 10.12; 8 studies, 47,992 women; I<sup>2</sup>=92.6%). The pooled incidence of complications per 1,000 women involved in MVC was labour induction (276.43), preterm delivery (191.90) and caesarean section (166.65). Compared to women not involved in MVC, those involved had increased odds of placental abruption (OR 1.43, 95% CI 1.27 to 1.63; 3 studies, 1,500,825 women) and maternal death (OR 202.27; 95% CI 110.60 to 369.95; 1 study, 1,094,559 women). Pregnant women involved in MVC using seatbelts have a lower risk of fetal death (OR 0.66 95%CI 0.36 to 1.19).

**Conclusion:** Pregnant women involved in MVC were at a higher risk of maternal and fetal death, and complications than those not involved.

1  
2  
3 **PROSPERO registration:** CRD42018100788  
4

5 **Key terms:** Pregnancy; motor vehicle crashes; pregnancy complications  
6

7 **Word count:** 300  
8

### 9 **Strengths and limitations of this study** 10

- 11 • This is the first systematic review examining the link between involvement in MVC,  
12 mortality and adverse outcomes that includes evaluation of study quality assessment.  
13
- 14 • This is the second systematic review looking at outcomes following MVC in pregnancy.  
15
- 16 • We conducted our review using a prospectively registered protocol and reported it in  
17 accordance with the international standards.  
18
- 19 • Outcomes variables correspond to any trimester, not to specific trimesters.  
20
- 21 • Outcomes according to seatbelt use are scarce, since only two studies use population-level  
22 data.  
23
- 24
- 25
- 26
- 27
- 28

### 29 **Funding statement** 30

31 This research received no specific grant from any funding agency in the public, commercial  
32 or not-for-profit sectors.  
33

### 34 **Competing interest's statement** 35

36 There is non-financial associations that may be relevant to the submitted manuscript.  
37  
38  
39  
40  
41  
42  
43  
44  
45  
46  
47  
48  
49  
50  
51  
52  
53  
54  
55  
56  
57  
58  
59  
60

only

## Introduction

Up to half of all women in developed countries drive motor vehicles (1) and the consequences of road traffic-related injuries involving pregnant women can be severe (2). Indeed, motor vehicle crashes (MVC) are the most common cause of non-obstetric trauma associated with fetal deaths (2.3 per 100,000 live births) (3). The risk of adverse outcomes resulting from an MVC increases in the second trimester of pregnancy if the pregnant women were the driver (4); however, this does not appear to be the case for pregnant passengers or pedestrians (5). A maternal mortality rate of 3.5 women per 100,000 is reported following MVCs in pregnant women (6). Mechanisms of injury recorded within the pregnant population of the UK national trauma registry, the Trauma Audit and Research Network (TARN), saw an increased rate of vehicular collision in pregnant women when compared to the non-pregnant cohort (7). In 2001-2008, 2.9% of pregnant women in North Carolina were drivers in one or more crashes (8). In the USA, data from the National Automotive Sampling System (NASS/CDS) reflects that when vehicles with pregnant women are involved in a collision, 50% of those women will sustain an injury (9). There are few safety guidelines on travelling by car during pregnancy (10-12). The focus of these tends to be on questions around the use of seatbelts and the activation of airbags in the car (12).

There is a reported association between MVC and maternal mortality (13). Moreover, further associations such as the trigger for immediate delivery or being more likely to die are reported with severe blunt injury (Injury Severity Score (ISS) of 9 or above, or systolic blood pressure (SBP) <90mmHg on arrival) (14). Involvement in MVC is also associated with perinatal mortality (15), injuries to the abdominal region (16), placental abruption secondary to increased intra-abdominal pressure (17), preterm birth, and caesarean section (6). However, more data is required in relation to areas such as fetal outcomes and higher risk pregnancies, particularly regarding sociodemographic characteristics of the mother, specific trimester of pregnancy when exposed to trauma, socioeconomic country conditions, severity and type of trauma, and collision characteristics such as speed. A systematic review on trauma in pregnancy (including five studies reporting complications of involvement in MVC, and fourteen other studies on others form of trauma) showed that MVC and domestic violence were the most common causes of traumatic injury during pregnancy (4). No quality

1  
2  
3 assessment of the included studies was reported in this review. Previous non-systematic reviews have  
4 published strategies used to monitor women and fetuses after a crash (18-21). However, to our  
5 knowledge there is no systematic review or meta-analysis focused on the maternal and fetal outcomes  
6 after MVC in pregnancy.  
7  
8  
9  
10

11  
12  
13 As the clinical impact on the mother and fetus after MVC has not been well documented, we conducted  
14 a systematic review of the effect on maternal and fetal outcomes of MVC in pregnant women, compared  
15 to those not involved in a collision.  
16  
17  
18  
19  
20

## 21 **Methods**

22  
23 We conducted a systematic review and reported it according to recommended standards (22). The  
24 review was prospectively registered with PROSPERO (no. CRD42018100788).  
25  
26  
27  
28  
29

### 30 *Literature search*

31  
32 The following databases were used to identify relevant literature: Medline, Embase, Web of Science,  
33 Scopus, LILACS (Latin-American and Caribbean System on Health Sciences Information), Science  
34 Citation Index, SciELO (Scientific Electronic Library Online), TRANSPORT, IRRD (International  
35 Road Research Documentation), TRANSDOC (European Conference of Ministers of Transportation  
36 databases), Cochrane Database of Systematic Reviews (CDSR), and Cochrane Central Register of  
37 Controlled Trials (CENTRAL). We also sought to identify unpublished research or research reported  
38 in the grey literature by searching a range of relevant databases, including the Inside Conferences,  
39 Systems for Information on Grey Literature (SIGLE) and Dissertation Abstracts. Furthermore, the  
40 searches of the medical database were supplemented with the Internet search using a general search  
41 engine (e.g. Google, [www.google.co.uk/](http://www.google.co.uk/)) and safetylit.org. Language and date restrictions were not  
42 applied to electronic searches. Relevant studies were identified using a combination of, but not limited  
43 to, the medical subject headings (MeSH) and keywords for motor vehicle collision (OR road traffic  
44 collision OR crash OR collision) and pregnancy (OR pregnant women OR gravid women OR  
45 childbearing women OR maternal).  
46  
47  
48  
49  
50  
51  
52  
53  
54  
55  
56  
57  
58  
59  
60



1  
2  
3 Papers were selected if they studied the effects of exposure to trauma due to involvement in an MVC  
4 during pregnancy vs. non-exposure, with follow up to verify outcomes in various settings including  
5 secondary care, collision and emergency, and inpatient care. Observational studies (cohort studies, case-  
6 control design, non-intervention arms of randomised controlled trials) were included. Case series and  
7 case reports were excluded. Appendix 1 shows the search strategy for Medline (via Ovid) and Appendix  
8 2 the excluded studies with reasons.  
9  
10  
11  
12  
13  
14  
15  
16  
17

### 18 *Data extraction and study quality assessment*

19  
20 Two reviewers (CAP & JR) independently extracted the relevant data from each full-text article and  
21 data were recorded using a standardized data extraction form. A data extraction form was piloted for  
22 each study design and amended as required. Discrepancies were resolved by consensus or by a  
23 discussion with a third senior author (ER). We extracted data on a) severe adverse maternal outcomes  
24 such as maternal death, miscarriage and preterm birth (<37/40 and <34/40); b) severe adverse fetal  
25 outcomes such as intrauterine death/stillbirth and neonatal death. Secondary outcomes were: a)  
26 individual components of maternal outcomes such as preterm labour, mode of delivery (vaginal delivery  
27 vs caesarean section), premature rupture of membranes (PROM), preterm premature rupture of  
28 membranes (PPROM), placental abruption, chorioamnionitis/sepsis and maternal admission to an  
29 intensive care unit (ICU) or high dependency unit (HDU); b) individual components of fetal outcomes:  
30 respiratory distress syndrome, neonatal ICU admission, low birth weight (LBW) and small for  
31 gestational age (SGA).  
32  
33  
34  
35  
36  
37  
38  
39  
40  
41  
42  
43  
44  
45  
46  
47

48 We also extracted data on 1) adverse outcomes in pregnant women involved in MVC and their offspring  
49 in subgroups according to maternal characteristics (low, high and any risk), trimester of exposure,  
50 country (low and middle income, high income), type of trauma (penetrating, blunt, burns), severity of  
51 trauma (mild, moderate, severe), seatbelt use (yes, no), study quality (low, high); 2) risk factors for  
52 pregnancy complications following MVC such as maternal characteristics (age, parity, high risk  
53 pregnancy, gestational age), type of trauma, type of motor vehicle, type of collision, collision  
54 characteristic (stationary, high or moderate speed) and seat belt use.  
55  
56  
57  
58  
59  
60

1  
2  
3 The quality assessment of studies was independently evaluated by two reviewers (JR and CAP) using  
4 the Newcastle-Ottawa Scale (23). This scale includes 8 items, 4 items about selection criteria of cases  
5 or cohorts in case-control or cohort designs, respectively; 2 items about comparability between groups  
6 (in both designs); and 3 items about exposure criteria in case-control designs and about outcomes in  
7 cohort designs. Any of those studies could be awarded a maximum of one star for each numbered item  
8 within the selection and exposure categories. A maximum of two stars could be given for comparability.  
9 For the incidence analysis, we considered six aspects (24): 1) representativeness of cohort; 2) design;  
10 3) method of sampling; 4) adequacy of follow-up; 5) if the outcomes were adequately ascertained and  
11 4) if measurement or misclassification bias were minimized. Studies without these features or with  
12 unclear reporting were classified to have a high risk of bias.  
13  
14  
15  
16  
17  
18  
19  
20  
21  
22  
23  
24  
25

### 26 *Data synthesis*

27  
28 We undertook random-effects meta-analysis to determine the odds ratios (OR) with 95% confidence  
29 intervals (CI) for maternal and offspring complications from MVC. We estimated heterogeneity  
30 between the included studies with Chi-Square test of Q (I<sup>2</sup>) excepting when not enough studies were in  
31 the meta-analysis (2-3), and we pooled the rates of maternal/fetal complications and reported with 95%  
32 CI. For each primary outcome, a meta-analysis was conducted for studies sufficiently homogeneous in  
33 terms of the characteristics of participants and exposure. The subgroup analysis was applied in: a)  
34 trimester of pregnancy during which the trauma occurred; b) maternal risk status (low, high, any risk);  
35 c) type of trauma; d) severity of trauma (using the ISS to categorize the severity of trauma sustained  
36 following MVC) (25); e) setting (low and middle income, high-income country); f) year of study  
37 publication: (before or after the introduction of mandatory seatbelt legislature in the country of study);  
38 and g) study quality according to the Newcastle and Ottawa Scale (23).  
39  
40  
41  
42  
43  
44  
45  
46  
47  
48  
49  
50  
51  
52  
53  
54  
55  
56  
57  
58  
59  
60

## Results

### *Study selection*

Out of 1,739 retrieved references, 19 studies met the eligibility criteria (Figure 1). Five of these reported data allowing us to compare pregnancy complications between pregnant women involved in MVC and those not involved in MVC (6, 26-29). The totality of the studies (n = 19) contributed to the analysis of the incidence of pregnancy complications among women involved in MVC (6, 17, 26-42).

### *Characteristics of included studies*

The characteristics of included studies are in Table 1. Included studies were published between 1993 and 2016. Most of them were carried out in developed, high-income countries such as USA (14/18) (26, 28-31, 33-41), Sweden (1/19) (27), Kuwait (1/19) (17) and Israel (1/19) (42). The number of included pregnant women varies, ranging from 39 to 1,094,559. The data was sourced from hospital records/trauma registries (7/19) (17, 31, 32, 35, 38, 39, 42) or from population-level databases (12/19) (6, 26-30, 33, 34, 36, 37, 40, 41). The majority of studies collected information on outcomes of pregnant women involved in MVC during any trimester of pregnancy. 8 out of 19 studies reported information about the use of safety devices such as seatbelts and/or airbag (26, 29, 30, 33, 35, 37-39). Also in eight studies, the authors assessed the severity of MVC injuries with five of these using a validated tool (28, 31, 35, 38, 42) – most of them reporting ISS (28, 31, 35, 42) and one the Revised Trauma Scale (38) .

### *Quality assessment*

60% of studies had a low risk of bias with regards to the adequacy of representativeness and random sample selection (12/19). None of the studies was prospective. The categories of follow up of more than 80% of participants, outcome ascertainment and misclassification bias showed low risk (Figure 2). The five papers included for comparison of complication rates between pregnant women exposed to MVC and those who were not exposed (assessed using the Newcastle-Ottawa Scale) showed generally high quality, with four papers scoring 9/9 (6, 26, 28, 29) . The remaining paper scored 8/9, losing one point for the comparability as it did not control for any secondary factors (27).

### *Incidence of complications among pregnant women involved in motor vehicle crashes*

The assessment of adverse outcome incidence among women involved in MVC (using population-level data) demonstrated incidence estimations of 276.43 per 1000 for induction of labour (95%CI 262.54 to 290.54), 191.90 per 1000 for preterm delivery (95%CI 45.98 to 405.74), and 166.65 per 1000 for caesarean section (95%CI 47.34 to 339.00). The estimated incidence rates for other complications included 42.33 per 1000 for PROM, 17.08 per 1000 requiring admission to hospital, 16.14 per 1000 for placental abruption and 15.19 per 1000 for neonatal respiratory distress. A pooled incidence of maternal death was 3.60 per 1000 women (95%CI 0.25 to 10.42, 3 studies, 12,000 women, Tau=1.77). The pooled incidence of perinatal death per 1000 women was 6.60, (95% CI 3.81 to 10.12; 8 studies, 47,992 women;  $I^2=92.6\%$ ) (Table 2). The representation of the maternal and offspring outcomes according to trauma severity are in appendices (Appendices 3 and 4). Using data from single hospital centres, the random pooled estimation for the incidence of admission to hospital was 117.92 per 1000 women (95%CI 109.82 to 126.40) (17, 38); for maternal death was 135.05 per 1000 women (95%CI 131.37 to 138.80) and for fetal death was 5.73 per 1000 women (95% CI 3.05 to 9.77) (Appendices 5 and 6).

### *Pregnancy complications in women involved vs not involved in motor vehicle crashes*

We observed a statistically significant link between involvement in MVC and maternal death (OR 202.3, 95%CI 110.60 to 370.00; single study) (27) (data not shown in table or graphic). Figure 3 shows pooled results from population-level data, demonstrating a positive association between MVC and placental abruption (OR 1.43 95% CI 1.27 to 1.63). Two studies contributed data used in sensitivity analyses stratifying by seatbelt use, where the pooled estimation (26, 29) of fetal death decreased with seatbelt devices (OR 0.66 95% CI 0.36 to 1.19) (Figure 4, supplementary). The review manager forest plot displays a positive but not statistically significant association between fetal death and MVC without seatbelt use (OR 5.78 95% CI 0.17 to 201.12,  $\text{Tau}^2 = 6.51$ ) (Figure 5, supplementary).

## **Discussion**

### *Statement of principal findings*

This review estimated that for women involved in MVC, maternal death occurrence was 3.6 per 1000 and perinatal death 6.6 per 1000 women. Compared to women not involved in MVC, those involved

1  
2  
3 had an increased odds of placental abruption, perinatal death, antepartum haemorrhage and maternal  
4 death. Pregnant women involved in MVC who use seatbelts have a lower risk of fetal death. The pooled  
5 incidence of complications per 1,000 women involved in MVC was, from the higher incidence to the  
6 lower, induction of labour, preterm delivery, caesarean section, premature rupture of membrane, and  
7 placental abruption (population level-data).  
8  
9  
10  
11  
12

### 13 14 15 16 *Strengths and weaknesses of this study*

17  
18 This is the second systematic review, after the one of Mendez Figueroa et al., in 2013 (4), looking at  
19 outcomes following MVC in pregnancy. We conducted our review using a prospectively registered  
20 protocol (PROSPERO) and reported it in accordance with the international standards (43). This review,  
21 to our best knowledge, is the first one examining the link between involvement in MVC, mortality and  
22 adverse outcomes that involves evaluation of study quality assessment; 14 studies looking at outcome  
23 incidence related to MVC (17, 30-42) and 5 studies comparing outcomes in pregnant women involved  
24 in MVC and those who were not (6, 26-29). We used established tools to assess outcome reporting  
25 quality for the incidence rates (44) and comparability (45). We included data from population-level and  
26 single centre studies, but the analysis and reporting of the results were independent in order to get  
27 precision and validity in the estimations. However, a couple of graphics of the maternal and offspring's  
28 outcomes incidences have been included as Appendix 3 and 4. Between August 2018 and September  
29 2019, there have been no new studies eligible to include in the systematic review.  
30  
31  
32  
33  
34  
35  
36  
37  
38  
39  
40  
41  
42  
43  
44

45 For the incidence analysis, we evaluated the quality of the 19 studies of this systematic review. The  
46 highest risk was in the design. None of the studies had a prospective design. The representativeness of  
47 cohort and the random method of sampling were other limitations of the quality of studies, with 7 out  
48 of 19 studies having a high risk of bias in these areas (17, 31, 32, 35, 38, 39, 42). However, the quality  
49 assessment of the five papers included for comparison of complication rates between pregnant women  
50 involved and not involved in MVC using the Newcastle-Ottawa Scale showed generally high quality,  
51 with four papers scoring 9/9 (6, 26, 28, 29).  
52  
53  
54  
55  
56  
57  
58  
59  
60

1  
2  
3 The weaknesses of this systematic review are as follows. Firstly, outcomes were not reported by  
4 trimester, with 13 out of 19 papers focused on MVC at any trimester. Secondly, outcomes, according  
5 to seatbelt use, are scarce as only two studies using population-level data looked at safety features as a  
6 stratification factor (26, 29). Two studies with data sourced from hospital records/single-site trauma  
7 registries (38, 39) and three studies utilising population-level databases (26, 29, 30) reported some  
8 outcomes regarding seatbelt-use. Thirdly, we found a limited number of relevant studies comparing  
9 outcomes between women involved and not involved in MVC. The majority of the studies were carried  
10 out in the USA (26, 28, 29) with most recent one published in 2013 (29). Fourthly, we found  
11 heterogeneity in the included studies, seven of them have been carried out using hospital records/single-  
12 site trauma registry (17, 31, 32, 35, 38, 39, 42) and twelve using population database (6, 26-30, 33, 34,  
13 36, 37, 40, 41). Finally, in only eight studies did authors assess severity of MVC injuries, with only five  
14 of these using a validated tool (28, 31, 35, 38, 42). This was a challenge when aiming to analyse results  
15 according to the severity of the crash.  
16  
17  
18  
19  
20  
21  
22  
23  
24  
25  
26  
27  
28  
29  
30  
31  
32

### 33 *Meaning of the study*

34 The principle outcomes reported in the comparability studies, all of them cohort studies from population  
35 database, were perinatal death (4/5) (6, 26, 27, 29), placental abruption and any preterm delivery (3/5)  
36 (6, 28, 29), being the most strong association with MVC maternal death, but this outcome comes from  
37 a single population database study (27). The principles outcomes according to the population level in  
38 descendant order of incidence estimate per 1000 were the induction of labour, preterm delivery,  
39 caesarean section, premature rupture of membranes, and admission to hospital, placental abruption and  
40 maternal death. The pooled result using meta-analysis of proportion (random-effects model) was  
41 placental abruption (outcome reported in three studies) (6, 28, 29). In this systematic review, stratifying  
42 by seatbelt use, we appreciated a higher association of fetal death with a non-seatbelt use when pregnant  
43 women were involved in an MVC. Previous studies have shown that pregnant women wearing a  
44 seatbelt during their MVC are not at a significantly higher risk of adverse fetal outcomes than women  
45 with no MVC involvement (46), and airbags contribute to the protection of both pregnant drivers and  
46 their fetuses (47).  
47  
48  
49  
50  
51  
52  
53  
54  
55  
56  
57  
58  
59  
60

1  
2  
3 The results from this systematic review and meta-analysis allow us to adopt primary prevention  
4 measures, recommendations and educational interventions related to the prevention of motor vehicle  
5 crashes in pregnancy, which should be incorporated into the primary care pregnancy guidelines.  
6  
7  
8  
9

### 10 11 *Unanswered questions and future research*

12  
13 The effects of MVC in pregnant women is a specific field that requires further research and an improved  
14 methodological approach to determine the risks of adverse maternal and fetal outcomes.  
15

16  
17 Additional variables such as trauma severity, the position of the women in the car, use of seatbelt,  
18 deployment or non-deployment of an airbag, severity of the crash and gestational week of pregnancy  
19 should be recorded in relation to MVC exposure in order to allow more precision when analysing  
20 outcomes. A greater number of studies in a variety of global settings would also confer more consistency  
21 in the outcomes.  
22  
23  
24  
25  
26  
27  
28  
29

### 30 31 *Conclusions*

32  
33 Pregnant women involved in MVC have a higher risk of maternal and fetal death and complications  
34 than those not involved. These risks are associated with not using seatbelt devices, and complications  
35 include induction of labour, preterm delivery and caesarean section. Road traffic authorities should be  
36 conscious and strict in targeting preventive measures in pregnant women at risk of MVC.  
37  
38  
39  
40  
41

42  
43 **Word count:** 3,032  
44  
45

### 46 47 **Author's contribution**

48  
49 PM conducted literature searches and screened publications jointly with JR. CAP and JR extracted the  
50 data. CAP and ER drafted the manuscript and conducted the statistical analyses. KSK and ST designed  
51 the study review. CAP is the guarantor. Authors VMR, KB, ABC, ST and KSK gave critical revision  
52 of the manuscript. All authors had full access to the data and take responsibility for the data analyses.  
53  
54 The corresponding author attests that all listed authors meet authorship criteria.  
55  
56  
57

### 58 59 **Acknowledgement**

60

1  
2  
3 The connection of Khalid S. Khan with the University of Granada has been possible thanks to aiding  
4  
5 for the hiring of distinguished teachers of the Beatriz Galindo Program. Senior Mode; Ministry of  
6  
7 Science, Innovation and Universities.  
8

9  
10 **Data sharing Statement**

11 No additional data available  
12  
13  
14  
15  
16  
17  
18  
19  
20  
21  
22  
23  
24  
25  
26  
27  
28  
29  
30  
31  
32  
33  
34  
35  
36  
37  
38  
39  
40  
41  
42  
43  
44  
45  
46  
47  
48  
49  
50  
51  
52  
53  
54  
55  
56  
57  
58  
59  
60

For peer review only



Table 1. Characteristics of included studies

| Study ID<br>Author, year,<br>Country         | Design                                                                            | Sample<br>size                       | Time<br>period | Inclusion criteria                                                             | Data source                                                                    | Trimester       | Seatbelt<br>use<br>(with data) | Assessment<br>of trauma<br>severity<br>(with data) | Method of<br>assessing<br>trauma<br>severity  | Maternal<br>outcomes                                                              | Offspring<br>outcomes                                          |
|----------------------------------------------|-----------------------------------------------------------------------------------|--------------------------------------|----------------|--------------------------------------------------------------------------------|--------------------------------------------------------------------------------|-----------------|--------------------------------|----------------------------------------------------|-----------------------------------------------|-----------------------------------------------------------------------------------|----------------------------------------------------------------|
| <b>Population-level data</b>                 |                                                                                   |                                      |                |                                                                                |                                                                                |                 |                                |                                                    |                                               |                                                                                   |                                                                |
| <b>Azar, 2005</b><br>USA                     | population-based<br>matched<br>retrospective<br>cohort<br><i>(incidence only)</i> | 5936                                 | 2003-<br>2011  | Admitted to<br>hospital<br>following MVC<br>while pregnant                     | Population-based<br>cohort                                                     | any             | no                             | no                                                 | N/A                                           | Maternal death                                                                    | -----                                                          |
| <b>Hyde, 2003</b><br>USA                     | retrospective<br>cohort<br><i>(incidence and<br/>comparison)</i>                  | 322704                               | 1992-<br>1999  | Pregnant<br>drivers involved<br>in MVC                                         | Linked databases<br>(police registry &<br>birth/death<br>certificates)         | any             | yes                            | yes                                                | Study-<br>specific<br>definition <sup>1</sup> | -----                                                                             | Fetal death                                                    |
| <b>Kvarnstrand, 2008</b><br>Sweden           | retrospective<br>cohort <i>(incidence<br/>and comparison)</i>                     | 1094559                              | 1991-<br>2001  | Maternal<br>inclusion on<br>the accident<br>register > 28 GW                   | Linked databases<br>(police registry &<br>birth/death<br>certificates)         | 2 <sup>nd</sup> | no                             | yes                                                | Study<br>specific<br>definition <sup>2</sup>  | Maternal death                                                                    | Fetal/neonatal<br>death                                        |
| <b>Kuo, 2007</b><br>USA                      | retrospective<br>chart/database<br>review <i>(incidence<br/>only)</i>             | 16982<br>injured<br>4479 (in<br>MVC) | 2002           | Pregnant women<br>hospitalized with<br>injury (only MVC<br>used)               | Sample from<br>population level<br>cohort (National<br>Inpatient Sample)       | any             | no                             | no                                                 | N/A                                           | Delivery,<br>hospitalization                                                      | -----                                                          |
| <b>Schiff, 2005</b><br>USA                   | retrospective<br>cohort<br><i>(incidence and<br/>comparison)</i>                  | 17899                                | 1989-<br>2001  | Hospitalized for<br>MVC and with<br>a singleton<br>livebirth or<br>fetal death | Linked databases<br>(hospital discharge<br>data & birth/death<br>certificates) | any             | no                             | yes                                                | ISS                                           | Preterm birth,<br>PROM,<br>C-section,<br>placental<br>abruption                   | Stillbirth<br>LBW, SGA,<br>Fetal distress,<br>RDS,<br>Meconium |
| <b>Schiff, 2010</b><br>USA                   | retrospective<br>cohort <i>(incidence<br/>only)</i>                               | 3348                                 | 2002-<br>2005  | Nonrollover<br>MVC among<br>pregnant<br>front seat<br>occupants                | Linked databases<br>(hospital discharge<br>data & birth/death<br>certificates) | any             | yes (airbag)<br>no (seatbelt)  | no                                                 | N/A                                           | Preterm birth,<br>placental<br>abruption, labour<br>induction, C-<br>section      | Stillbirth,<br>LBW<br>SGA, RDS<br>Fetal distress<br>Meconium   |
| <b>Vivian-<br/>Taylor, 2012</b><br>Australia | retrospective<br>cohort<br><i>(incidence and<br/>comparison)</i>                  | 604380                               | 2000-<br>2007  | Women who gave<br>birth exposed and<br>not exposed to<br>MVC                   | Linked databases<br>(hospital discharge<br>data & birth/death<br>certificates) | 2 <sup>nd</sup> | no                             | yes                                                | Study-<br>specific<br>definition <sup>3</sup> | Admission,<br>placental<br>abruption,<br>APH,PPH,<br>preterm birth, C-<br>section | Perinatal<br>death,<br>neonatal<br>transfer                    |

|                                                |                                                                                  |        |           |                                                                                   |                                                                       |                                   |                                |     |             |                                               |                              |
|------------------------------------------------|----------------------------------------------------------------------------------|--------|-----------|-----------------------------------------------------------------------------------|-----------------------------------------------------------------------|-----------------------------------|--------------------------------|-----|-------------|-----------------------------------------------|------------------------------|
|                                                |                                                                                  |        |           |                                                                                   |                                                                       |                                   |                                |     |             |                                               |                              |
| <b>Vladutiu, 2013</b><br>USA                   | retrospective cohort<br>( <i>incidence and comparison</i> )                      | 878546 | 2001-2008 | Pregnant women 16-46 years, > 20GW, delivering a live/stillbirth singleton infant | Linked databases (police registry & birth/death certificates)         | 2 <sup>nd</sup>                   | yes (seatbelt)<br>yes (airbag) | no  | N/A         | Placental abruption, PROM, preterm birth      | Stillbirth                   |
| <b>Weiss, 2002</b><br>USA                      | crash database pregnant vs. non-pregnant (NASS/CDS)<br>( <i>incidence only</i> ) | 32810  | 1995-1999 | Pregnant and non-pregnant women 15-39 years                                       | Sample from population-level database of traffic accidents            | any                               | yes                            | no  | N/A         | Maternal death                                | -----                        |
| <b>Weiss, 2008</b><br>USA                      | retrospective cohort<br>( <i>incidence only</i> )                                | 1816   | 1999-2002 | Injury-related emergency department visits by pregnant women (only MVC used)      | Linked databases (hospital discharge data & birth/death certificates) | any                               | no                             | no  | N/A         | Hospital admission                            | -----                        |
| <b>Whitehead, 2013*</b><br>USA                 | PRAMS survey database<br>( <i>incidence only</i> )                               | 235329 | 2000-2005 | Survey of women who recently delivered a live-born infant                         | Population-based cohort (PRAMS)                                       | any                               | no                             | no  | N/A         | Preterm birth, UTI, PROM                      | -----                        |
| <b>Wolf, 1993</b><br>USA                       | population-based retrospective cohort<br>( <i>incidence only</i> )               | 2582   | 1980-1988 | Pregnant women drivers involved in MVC >20GW                                      | Linked databases (police registry & birth/death certificates)         | 2 <sup>nd</sup> & 3 <sup>rd</sup> | yes                            | no  | N/A         | Preterm birth, placental abruption, C-section | Stillbirth, LBW, RDS         |
| <b>Single hospital records/trauma registry</b> |                                                                                  |        |           |                                                                                   |                                                                       |                                   |                                |     |             |                                               |                              |
| <b>Aboutanos, 2007</b><br>USA                  | retrospective chart/database review<br>( <i>incidence only</i> )                 | 148    | 2001-2005 | Pregnant women presenting to ED following MVC                                     | Single hospital records from trauma centre                            | any                               | yes (only in miscarriage)      | yes | ISS         | Maternal death, miscarriage                   | Fetal death, hydrops fetalis |
| <b>Baerga-Varela, 2000</b><br>USA              | retrospective chart/database review<br>( <i>incidence only</i> )                 | 39     | 1986-1996 | Admitted to hospital after MVC while pregnant                                     | Single hospital records                                               | any                               | no                             | yes | ISS         | Maternal death, miscarriage                   | Stillbirth                   |
| <b>Brookfield, 2013</b><br>USA                 | retrospective chart/database review<br>( <i>incidence only</i> )                 | 256    | 1990-2007 | Pregnant women presenting to ED following MVC                                     | Single hospital records from trauma centre                            | any                               | yes                            | yes | ISS and RTS | Maternal death, admission to hospital         | -----                        |

|                                |                                                         |      |           |                                                                        |                                 |                                   |     |    |     |                                                                                           |                                    |
|--------------------------------|---------------------------------------------------------|------|-----------|------------------------------------------------------------------------|---------------------------------|-----------------------------------|-----|----|-----|-------------------------------------------------------------------------------------------|------------------------------------|
| <b>Chibber, 2015</b><br>Kuwait | retrospective chart/database review<br>(incidence only) | 728  | 2009-2012 | MVC, pregnant, treated at major tertiary hospitals                     | Single hospital records         | 2 <sup>nd</sup>                   | no  | no | N/A | Maternal death, placental abruption, preterm birth, uterine rupture, C-Section, admission | Fetal death, fetal distress        |
| <b>Luley, 2013</b><br>USA      | retrospective chart/database review<br>(incidence only) | 126  | 1994-2010 | Pregnant women after an MVC >14/40 GA                                  | Single hospital trauma database | 2 <sup>nd</sup> & 3 <sup>rd</sup> | yes | no | N/A | Maternal death, placental abruption, C-section                                            | Stillbirth                         |
| <b>Miller, 2016</b><br>Israel  | retrospective cohort<br>(incidence only)                | 3794 | 2006-2013 | Women 18-40 years, in MVC and hospitalized (only pregnant cohort used) | National trauma registry        | any                               | no  | no | ISS | Maternal death, miscarriage, placental abruption, C-section                               | Stillbirth                         |
| <b>Orji, 2002</b><br>Nigeria   | retrospective chart/database review<br>(incidence only) | 84   | 1980-2000 | Pregnant women in MVC managed in tertiary hospitals                    | Single hospital records**       | any                               | no  | no | N/A | Maternal death, placental abruption, uterine rupture, C-section                           | Perinatal death, fetal tachycardia |

ISS: Injury Severity Score; RTS: Revised Trauma Score; ICU: Intensive Care Unit, N/A not applicable; GA: Gestational Age; LBW: Low birth weight; SGA: Small for gestational age; RDS: Respiratory distress syndrome. \*National survey; \*\*Two hospitals in same region included; <sup>1</sup>Possible/probable/incapacitated/fatal; <sup>2</sup>Fatal/major/minor/uninjured; <sup>3</sup>'Severe' = admission to ICU and/or blood transfusion and/or injury to abdomen/pelvis/lower back.

Table 2. Incidence of adverse outcomes per 1,000 women involved in motor vehicle crashes – data source: population databases

| Outcome                        | Number of studies | Number of women | Incidence estimate per 1,000 women | 95% CI             |
|--------------------------------|-------------------|-----------------|------------------------------------|--------------------|
| <b>Maternal</b>                |                   |                 |                                    |                    |
| Maternal death                 | 3                 | 12000           | 3.60                               | (0.25 to 10.42)    |
| Admission to hospital          | 2                 | 3838            | 17.08                              | (13.20 to 21.46)   |
| Placenta abruption             | 6                 | 36737           | 16.14                              | (7.04 to 28.78)    |
| Preterm delivery               | 5                 | 265680          | 191.90                             | (45.98 to 405.74)  |
| Premature Rupture of Membranes | 3                 | 260310          | 42.33                              | (5.87 to 109.24)   |
| Labour induction               | 2                 | 3930            | 276.43                             | (262.54 to 290.54) |
| Caesarean section              | 5                 | 12338           | 166.65                             | (47.34 to 339.00)  |
| <b>Offspring</b>               |                   |                 |                                    |                    |
| Fetal death                    | 3                 | 8210            | 5.97                               | (2.23 to 11.41)    |
| Perinatal death                | 8                 | 47992           | 6.60                               | (3.81 to 10.12)    |
| Fetal distress                 | 2                 | 3930            | 60.09                              | (52.85 to 67.77)   |
| Meconium at delivery           | 2                 | 3930            | 52.61                              | (45.82 to 59.85)   |
| Respiratory Distress Syndrom   | 3                 | 6522            | 15.19                              | (5.83 to 28.68)    |

CI, Confidence Interval

## Figures

Figure 1. The study selection process in the systematic review of outcomes on pregnant women involved in motor vehicle crashes

Figure 2. The quality assessment of the included studies

Figure 3. Comparison of outcomes between women involved and not involved in motor vehicle crashes

Figure 4. (Supplementary). Comparison of pregnancy complication between women involved and not involved in motor vehicle crashes stratified by seatbelt use

Figure 5. (Supplementary). Comparison of maternal and fetal death between women involved and not involved in motor vehicle crashes stratified by seatbelt use

## References

1. Sivak M. Female drivers in the United States, 1963-2010: from a minority to a majority? *Traffic Inj Prev*. 2013;14(3):259-60.
2. Azar T, Longo C, Oddy L, Abenhaim HA. Motor vehicle collision-related accidents in pregnancy. *Journal of Obstetrics and Gynaecology Research*. 2015;41(9):1370-6.
3. Weiss HB, Songer TJ, Fabio A. Fetal deaths related to maternal injury. *Jama-Journal of the American Medical Association*. 2001;286(15):1863-8.
4. Mendez-Figueroa H, Dahlke JD, Vrees RA, Rouse DJ. Trauma in pregnancy: an updated systematic review. *Am J Obstet Gynecol*. 2013;209(1):1-10.
5. Redelmeier DA, May SC, Thiruchelvam D, Barrett JF. Pregnancy and the Risk of a Traffic Crash. *Canadian Medical Association Journal*. 2014;186(10):pp 742-50.
6. Vivian-Taylor J, Roberts CL, Chen JS, Ford JB. Motor vehicle accidents during pregnancy: a population-based study. *Bjog-an International Journal of Obstetrics and Gynaecology*. 2012;119(4):499-503.
7. Battaloglu E, McDonnell D, Chu J, Lecky F, Porter K. Epidemiology and outcomes of pregnancy and obstetric complications in trauma in the United Kingdom. *Injury*. 2016;47(1):184-7.
8. Vladutiu CJ, Marshall SW, Poole C, Casteel C, Menard MK, Weiss HB. Adverse pregnancy outcomes following motor vehicle crashes. *Am J Prev Med*. 2013;45(5):629-36.
9. Manoogian S. Comparison of pregnant and non-pregnant occupant crash and injury characteristics based on national crash data. *Accident Analysis & Prevention*. 2015;74:pp 69-76.
10. Service NH. Car travel in pregnancy [Available from: <https://www.nhs.uk/conditions/pregnancy-and-baby/travel-pregnant/#car-travel-in-pregnancy>].
11. Trust NC. Safety Guidelines on travelling by car during pregnancy UK [Available from: <https://www.nct.org.uk>].
12. Gynecologist ACoOa. Car safety for pregnant women, babies and children. 2016.
13. Deshpande NA, Kucirka LM, Smith RN, Oxford CM. Pregnant trauma victims experience nearly 2-fold higher mortality compared to their nonpregnant counterparts. *American Journal of Obstetrics & Gynecology*. 2017;217(5):590.e1-.e9.
14. Schuster M, Becker N, Young A, Paglia MJ, Mackeen AD. Trauma in pregnancy: A review of the Pennsylvania Trauma Systems Foundation database. *Trauma (United Kingdom)*. 2018;20(1):30-7.
15. Gibbins KJ, Silver RM. Trauma/motor vehicle crashes and stillbirth. *American Journal of Obstetrics and Gynecology*. 2017;216 (1 Supplement 1):S552-S3.
16. Lien C, Ali A, Culhane J. Blunt abdominal trauma with uterine rupture and fetal demise. *Trauma (United Kingdom)*. 2017;19(3):219-21.
17. Chibber R, Al-Harmi J, Fouda M, El-Saleh E. Motor-vehicle injury in pregnancy and subsequent feto-maternal outcomes: Of grave concern. *Journal of Maternal-Fetal and Neonatal Medicine*. 2015;28(4):399-402.
18. Brown S, Mozurkewich E. Trauma during pregnancy. *Obstetrics and gynecology clinics of North America*. 2013;40(1):47-57.
19. Einav S, Sela HY, Weiniger CF. Management and outcomes of trauma during pregnancy. *Anesthesiology clinics*. 2013;31(1):141-56.
20. Mirza FG, Devine PC, Gaddipati S. Trauma in pregnancy: a systematic approach. *Am J Perinatol*. 2010;27(7):579-86.
21. Smith KA, Bryce S. Trauma in the pregnant patient: an evidence-based approach to management. *Emergency medicine practice*. 2013;15(4):1-18; quiz -9.
22. Moher D, Liberati A, Tetzlaff J, Altman DG. Preferred reporting items for systematic reviews and meta-analyses: the PRISMA statement. *Bmj*. 2009;339:b2535.
23. Lo CK-L, Mertz D, Loeb M. Newcastle-Ottawa Scale: comparing reviewers' to authors' assessments. *BMC Medical Research Methodology*. 2014;14(1):45.
24. Cheong-See F, Schuit E, Arroyo-Manzano D, Khalil A, Barrett J, Joseph KS, et al. Prospective risk of stillbirth and neonatal complications in twin pregnancies: systematic review and meta-analysis. *Bmj*. 2016;354:i4353.

25. Deng Q, Tang B, Xue C, Liu Y, Liu X, Lv Y, et al. Comparison of the Ability to Predict Mortality between the Injury Severity Score and the New Injury Severity Score: A Meta-Analysis. *Int J Environ Res Public Health*. 2016;13(8).
26. Hyde LK, Cook LJ, Olson LM, Weiss HB, Dean JM. Effect of motor vehicle crashes on adverse fetal outcomes. *Obstetrics & Gynecology*. 2003;102(2):279-86.
27. Kvarnstrand L, Milsom I, Lekander T, Druid H, Jacobsson B. Maternal Fatalities, Fetal and Neonatal Deaths Related to Motor Vehicle Crashes During Pregnancy: A National Population-Based Study. *Acta Obstetrica et Gynecologica Scandinavica*. 2008;87(9):9 p.
28. Schiff MA, Holt VL. Pregnancy outcomes following hospitalization for motor vehicle crashes in Washington State from 1989 to 2001. [Erratum appears in *Am J Epidemiol*. 2005 Jul 15;162(2):197]. *American Journal of Epidemiology*. 2005;161(6):503-10.
29. Vladutiu CJ, Marshall SW, Poole C, Casteel C, Menard MK, Weiss HB. Adverse Pregnancy Outcomes Following Motor Vehicle Crashes. *American Journal of Preventive Medicine*. 2013;45(5):629-36.
30. Wolf ME, Alexander BH, Rivara FP, Hickok DE, Maier RV, Starzyk PM. A retrospective cohort study of seat-belt use and pregnancy outcome after a motor-vehicle crash. *Journal of Trauma-Injury Infection and Critical Care*. 1993;34(1):116-9.
31. Baerga-Varela Y, Zietlow SP, Bannon MP, Harmsen WS, Ilstrup DM. Trauma in pregnancy. *Mayo Clinic Proceedings*. 2000;75(12):1243-8.
32. Orji EO, Fadiora SO, Ogunlola IO, Badru OS. Road traffic accidents in pregnancy in Southwest Nigeria: A 21-year review. *Journal of Obstetrics and Gynaecology*. 2002;22(5):516-8.
33. Weiss HB, Strotmeyer S, Group BMJP. Characteristics of pregnant women in motor vehicle crashes. *Injury Prevention*. 2002;8(3):p. 207-10.
34. Kuo C, Jamieson DJ, McPheeters ML, Meikle SF, Posner SF. Injury hospitalizations of pregnant women in the United States, 2002. *Am J Obstet Gynecol*. 2007;196(2):161.e1-6.
35. Aboutanos MB, Aboutanos SZ, Dompkowski D, Duane TM, Malhotra AK, Ivatury RR. Significance of motor vehicle crashes and pelvic injury on fetal mortality: A five-year institutional review. *Journal of Trauma - Injury, Infection and Critical Care*. 2008;65(3):616-20.
36. Weiss HB, Sauber-Schatz EK, Cook LJ. The epidemiology of pregnancy-associated emergency department injury visits and their impact on birth outcomes. *Accident Analysis & Prevention*. 2008;40(3):pp 1088-95.
37. Schiff MA, Mack CD, Kaufman RP, Holt VL, Grossman DC. The Effect of Air Bags on Pregnancy Outcomes in Washington State: 2002-2005. *Obstetrics and Gynecology*. 2010;115(1):pp 85-92.
38. Brookfield KF, Gonzalez-Quintero VH, Davis JS, Schulman CI. Maternal death in the emergency department from trauma. *Archives of Gynecology & Obstetrics*. 2013;288(3):507-12.
39. Luley T, Fitzpatrick CB, Grotegut CA, Hocker MB, Myers ER, Brown HL. Perinatal implications of motor vehicle accident trauma during pregnancy: Identifying populations at risk. *American Journal of Obstetrics and Gynecology*. 2013;208(6):466.e1-e5.
40. Whitehead NS. Prenatal Counseling on Seat Belt Use and Crash-Related Medical Care. *Maternal and Child Health Journal*. 2013;17(9):pp 1527-32.
41. Azar T, Longo C, Oddy L, Abenheim HA. Motor vehicle collision-related accidents in pregnancy. *Journal of Obstetrics and Gynaecology Research*. 2015;41(9):pp 1370-6.
42. Miller N, Biron-Shental T, Peleg K, Fishman A, Olsha O, Givon A, et al. Are pregnant women safer in motor vehicle accidents? *Journal of Perinatal Medicine*. 2016;44(3):329-32.
43. Liberati A, Altman DG, Tetzlaff J, Mulrow C, Gotzsche PC, Ioannidis JP, et al. The PRISMA statement for reporting systematic reviews and meta-analyses of studies that evaluate health care interventions: explanation and elaboration. *Annals of internal medicine*. 2009;151(4):W65-94.
44. Glasziou P, Irwig L, Bain C, Colditz G. Frequency and rate. In: *Systematic reviews in health care: a practical guide*, 2nd edn. Cambridge, UK: Cambridge University Press, 2001: 67-73.
45. Lo CK, Mertz D, Loeb M. Newcastle-Ottawa Scale: comparing reviewers' to authors' assessments. *BMC Med Res Methodol*. 2014;14:45.
46. Hyde LK, Cook LJ, Olson LM, Weiss HB, Dean JM. Effect of motor vehicle crashes on adverse fetal outcomes. *Obstet Gynecol*. 2003;102(2):279-86.

- 1  
2  
3 47. Acar BS, Meric M. The effect of placenta location on the safety of pregnant driver and her fetus.  
4 International Journal of Crashworthiness. 2017;22(2):pp 163-8.  
5  
6  
7  
8  
9  
10  
11  
12  
13  
14  
15  
16  
17  
18  
19  
20  
21  
22  
23  
24  
25  
26  
27  
28  
29  
30  
31  
32  
33  
34  
35  
36  
37  
38  
39  
40  
41  
42  
43  
44  
45  
46  
47  
48  
49  
50  
51  
52  
53  
54  
55  
56  
57  
58  
59  
60

For peer review only



1  
2  
3  
4  
5  
6  
7  
8  
9  
10  
11  
12  
13  
14  
15  
16  
17  
18  
19  
20  
21  
22  
23  
24  
25  
26  
27  
28  
29  
30  
31  
32  
33  
34  
35  
36  
37  
38  
39  
40  
41  
42  
43  
44  
45  
46  
47  
48  
49  
50  
51  
52  
53  
54  
55  
56  
57  
58  
59  
60

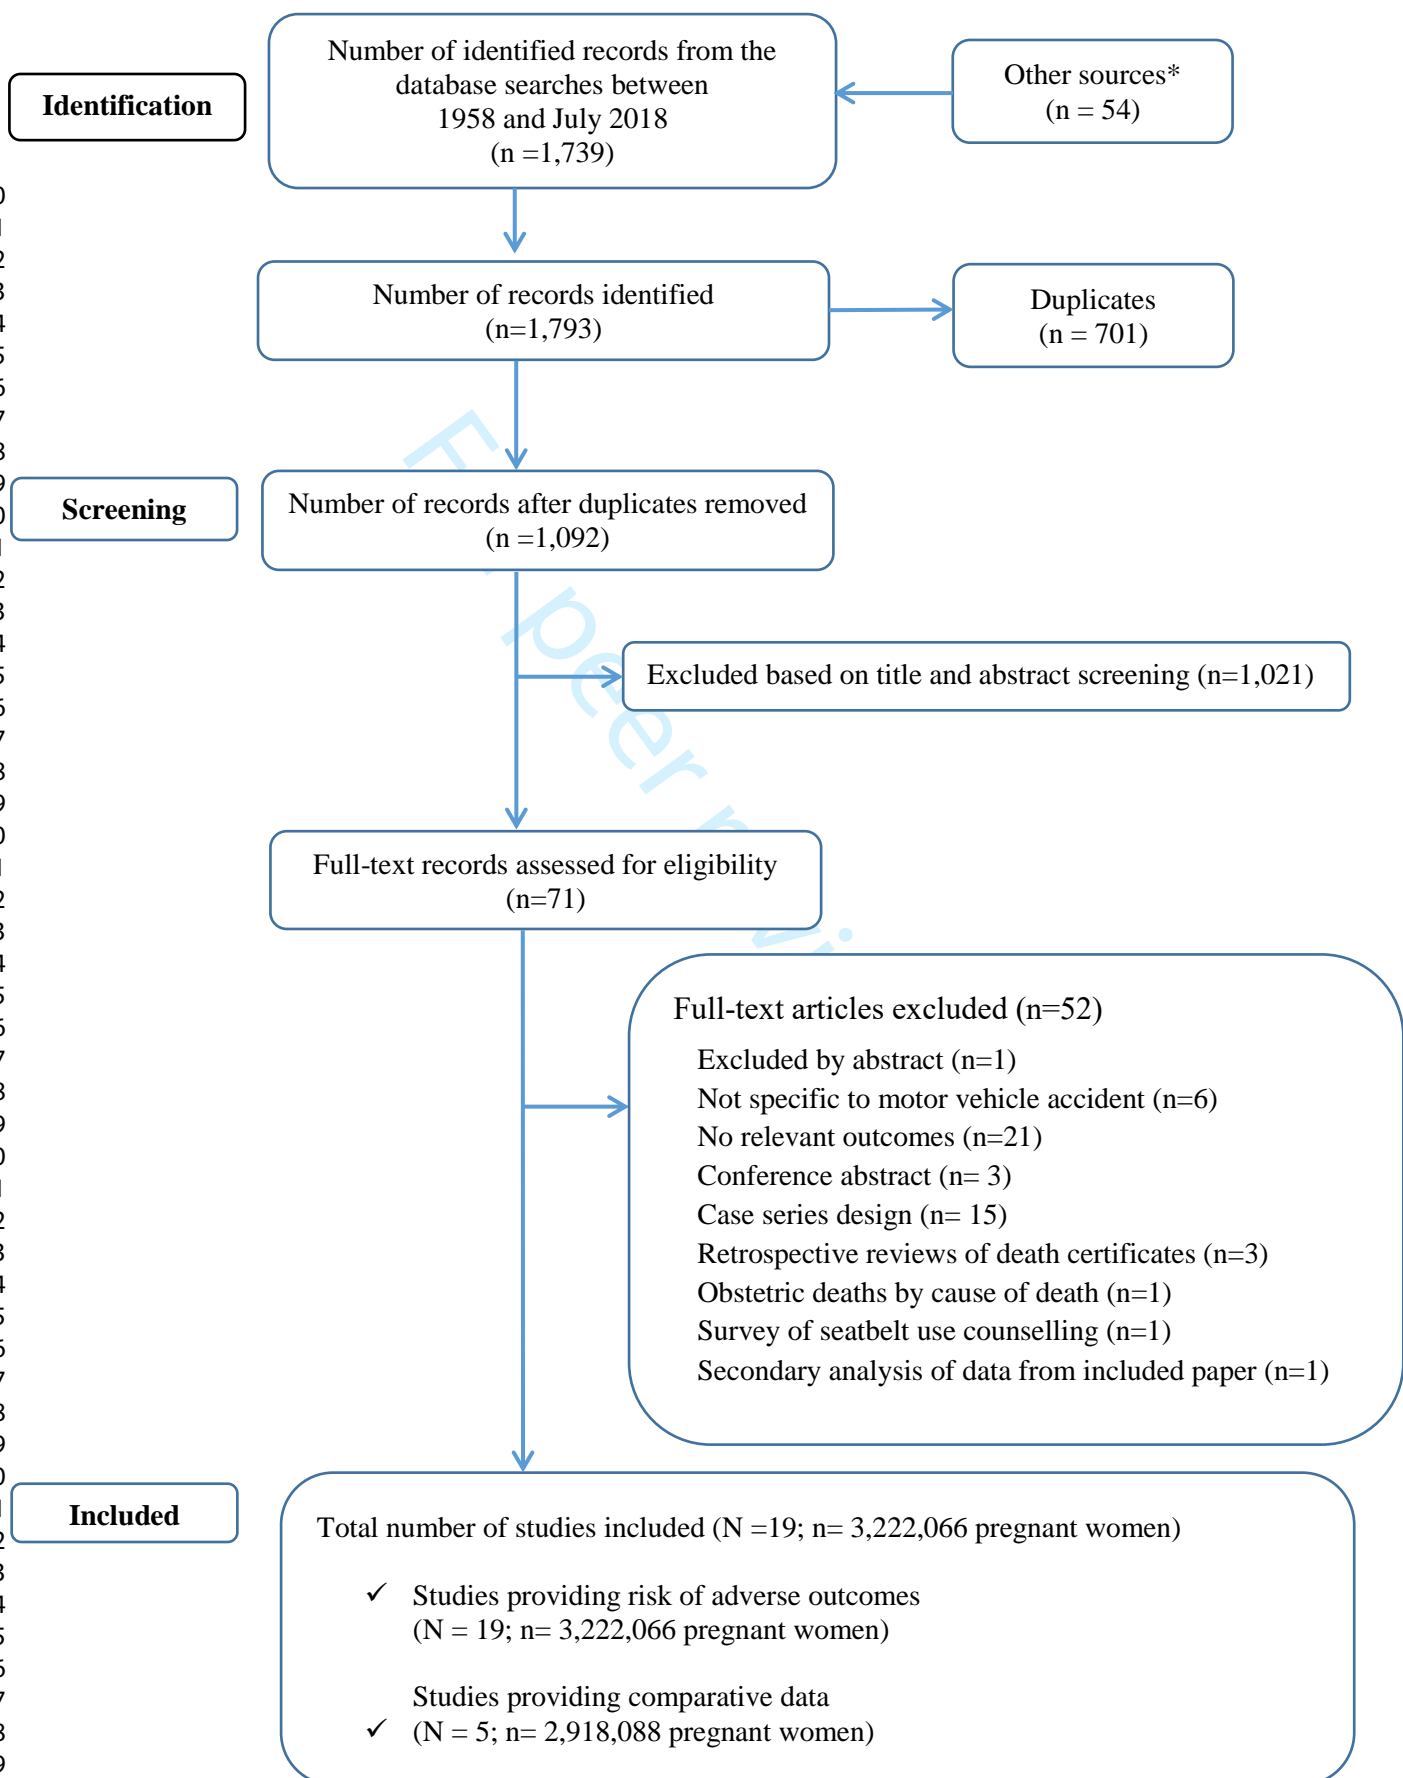

\*references of relevant non-systematic reviews and Google scholar



1  
2  
3  
4  
5  
6  
7  
8  
9  
10  
11  
12  
13  
14  
15  
16  
17  
18  
19  
20  
21  
22  
23  
24  
25  
26  
27  
28  
29  
30  
31  
32  
33  
34  
35  
36  
37  
38  
39  
40  
41  
42  
43  
44  
45  
46  
47  
48  
49  
50  
51  
52  
53  
54  
55  
56  
57  
58  
59  
60

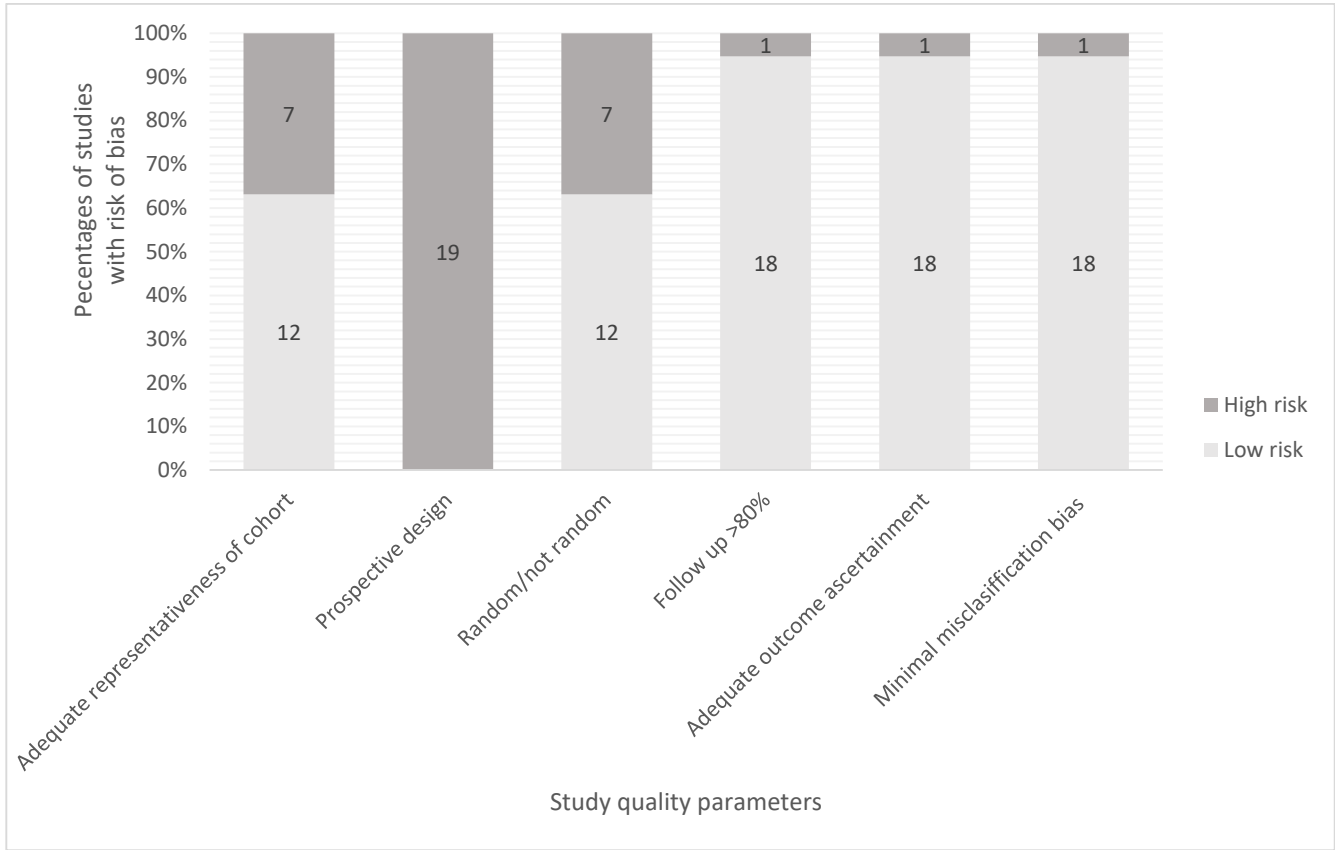

review only

**Outcome**

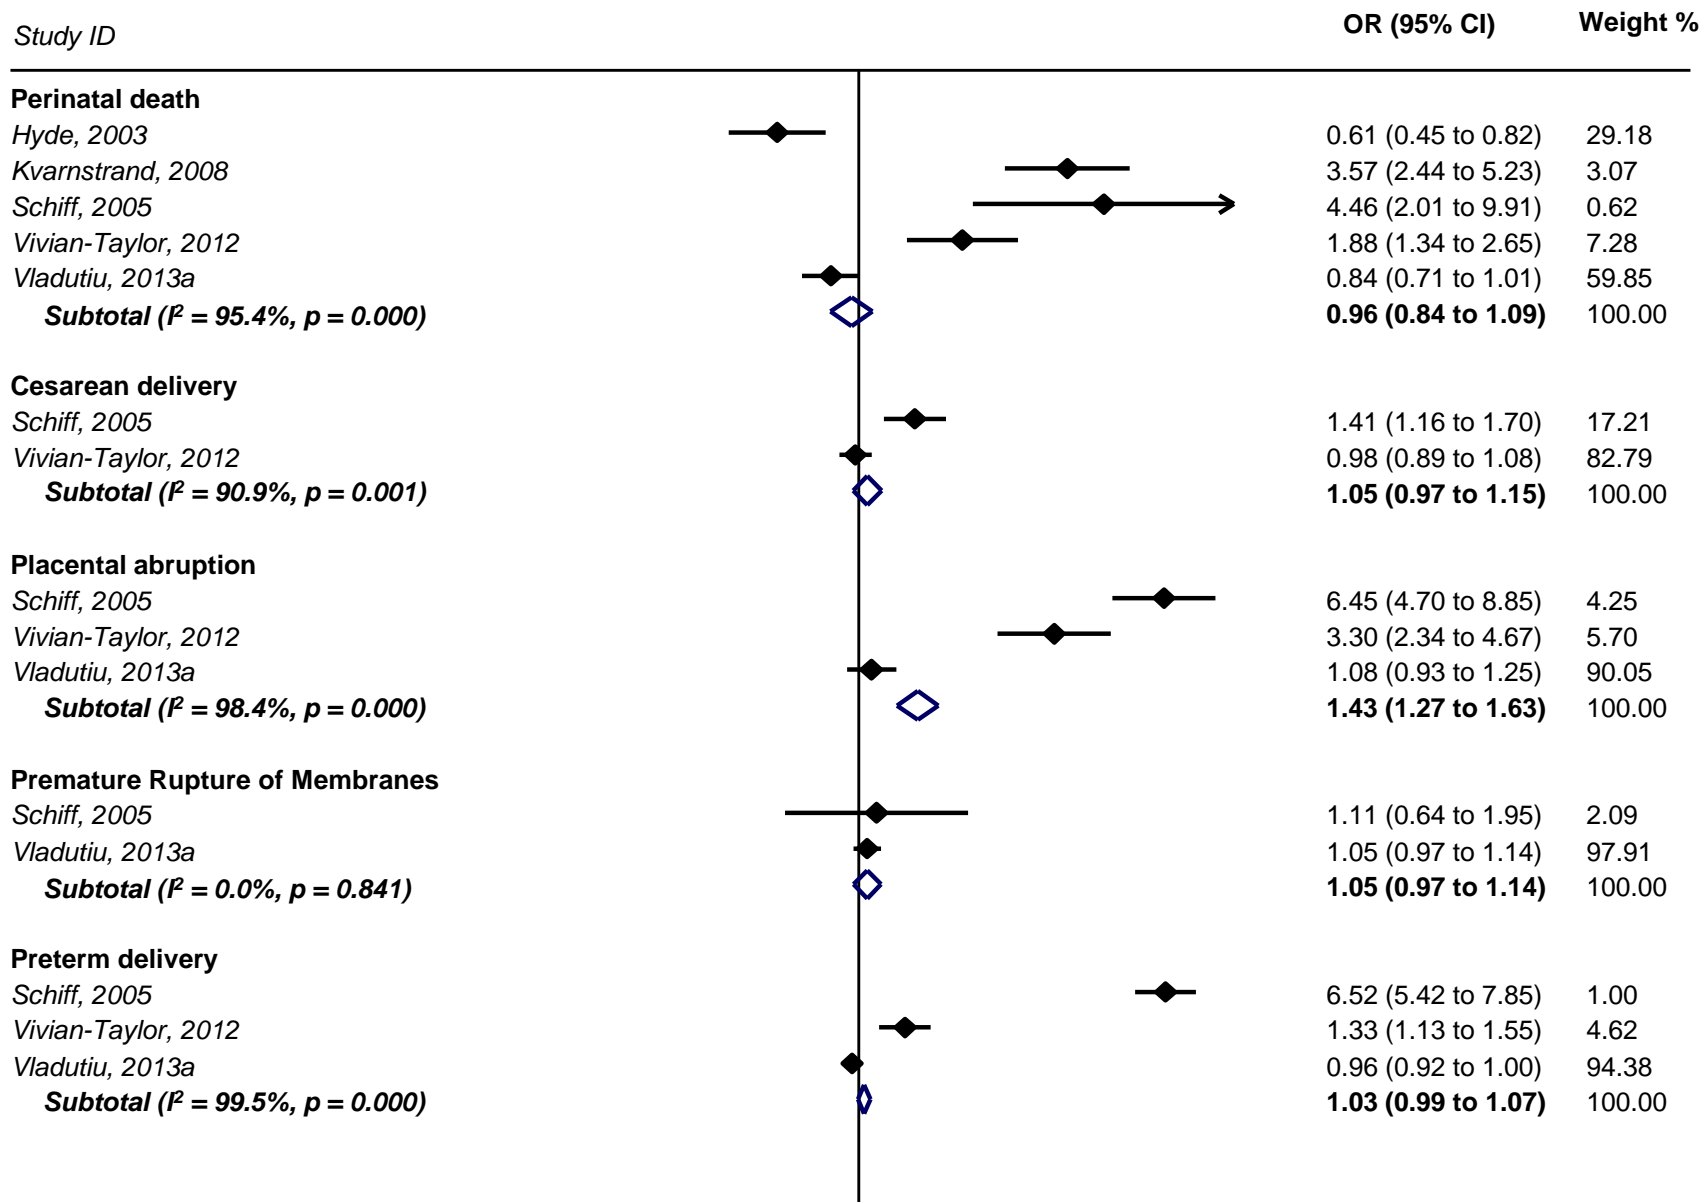

1  
2  
3  
4  
5  
6  
7  
8  
9  
10  
11  
12  
13  
14  
15  
16  
17  
18  
19  
20  
21  
22  
23  
24  
25  
26  
27  
28  
29  
30  
31  
32  
33  
34  
35  
36  
37  
38  
39  
40  
41

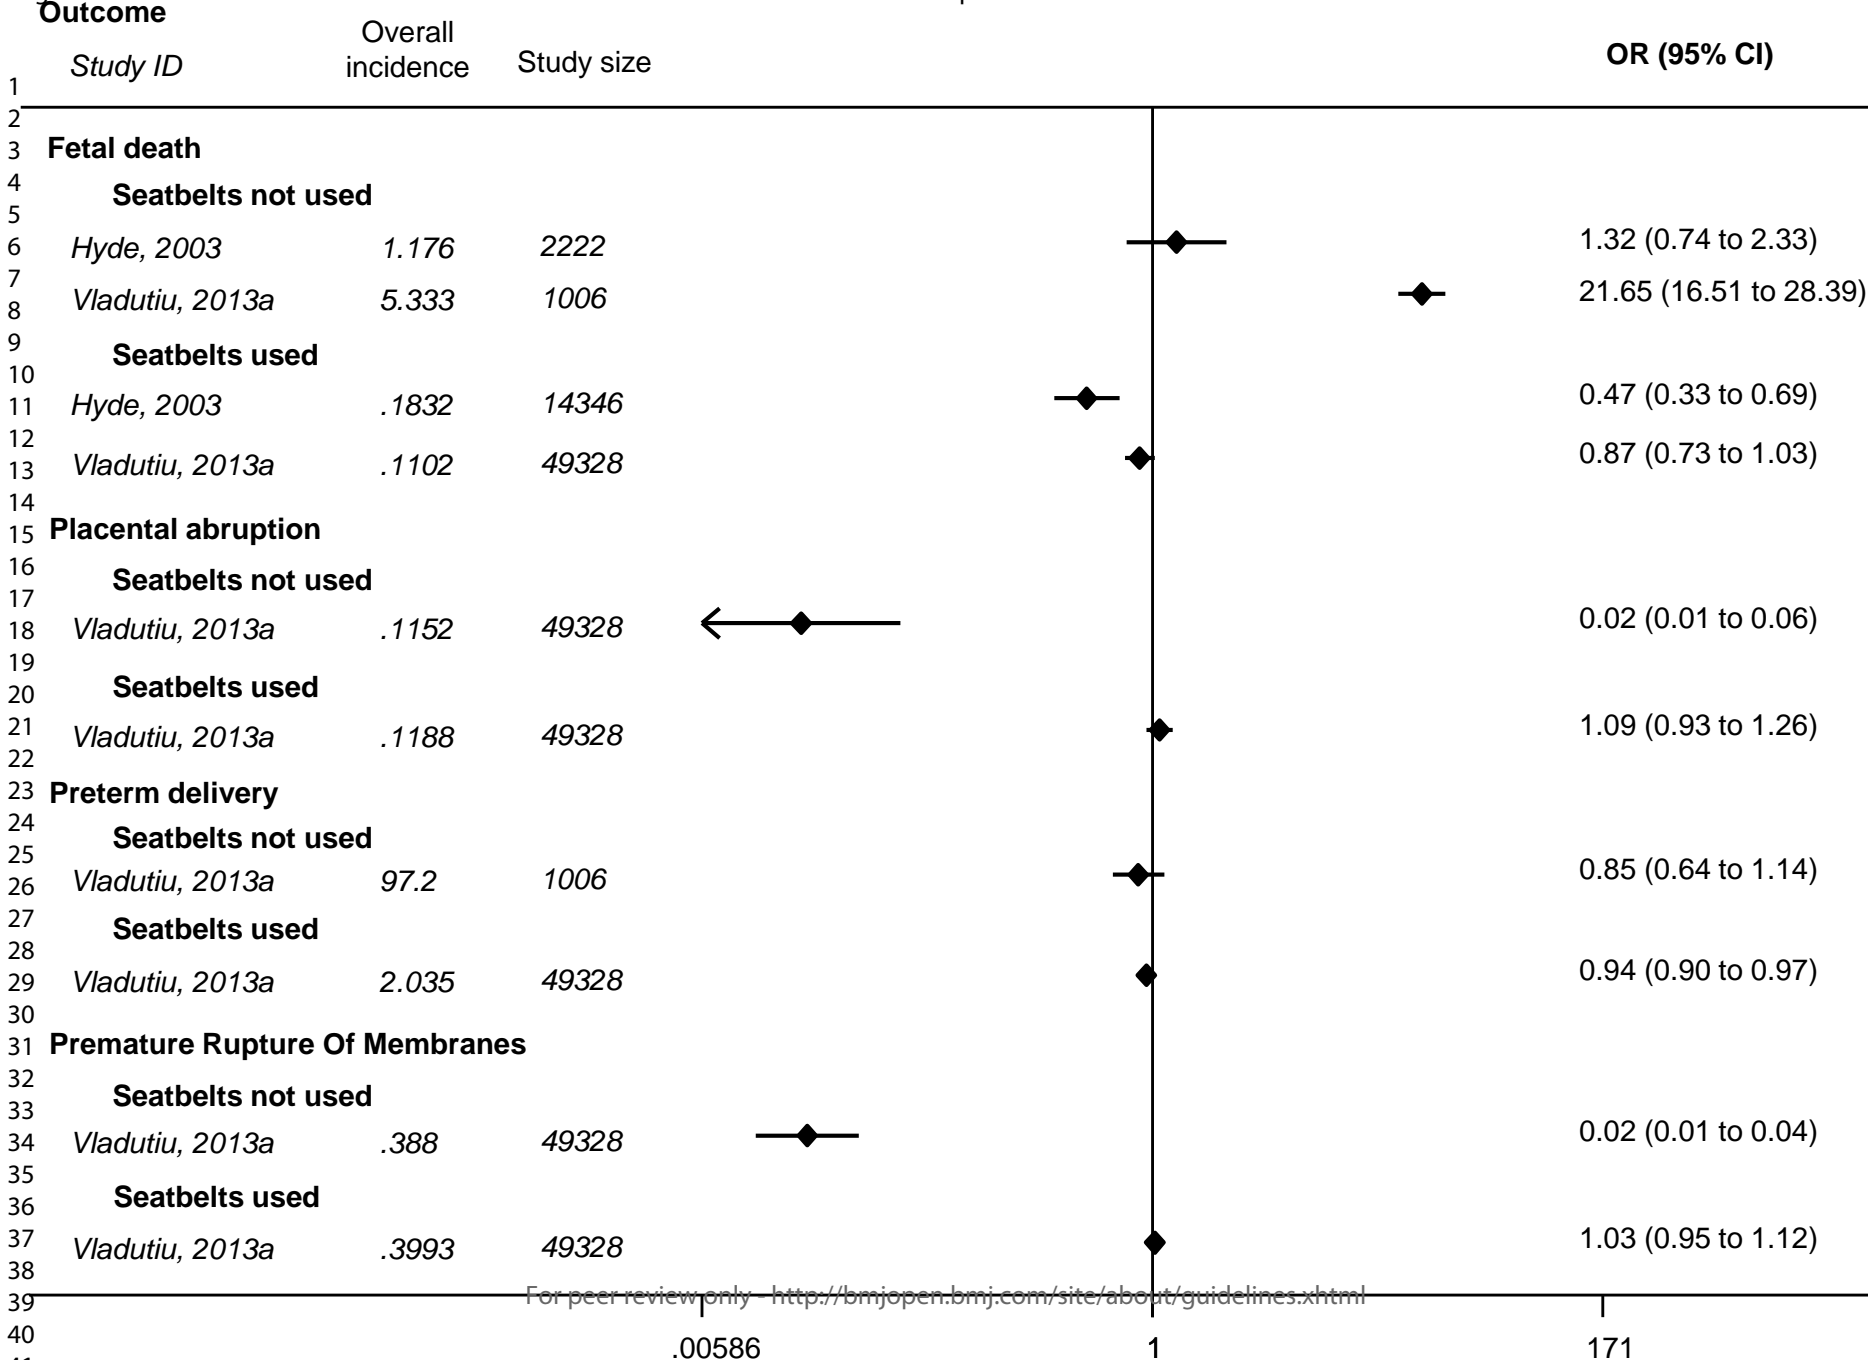

| Study ID (Subgroup)                  | MVC        |              | Non MVC     |                | Weight        | Odds Ratio M-H, Random, 95% CI |
|--------------------------------------|------------|--------------|-------------|----------------|---------------|--------------------------------|
|                                      | Events     | Total        | Events      | Total          |               |                                |
| <b>Fetal deaths (seatbelts used)</b> |            |              |             |                |               |                                |
| Hyde 2003                            | 28         | 7145         | 2600        | 313674         | 46.2%         | 0.47 (0.32 to 0.68)            |
| Madutiu 2013                         | 133        | 24531        | 5305        | 848073         | 53.8%         | 0.87 (0.73 to 1.03)            |
| <b>Subtotal (95% CI)</b>             |            | <b>31676</b> |             | <b>1161747</b> | <b>100.0%</b> | <b>0.65 (0.36 to 1.19)</b>     |
| <b>Total events</b>                  | <b>161</b> |              | <b>7905</b> |                |               |                                |

Heterogeneity:  $\tau^2 = 0.17$ ;  $\chi^2 = 8.58$ ,  $df = 1$  ( $P = 0.003$ );  $I^2 = 88\%$   
 Test for overall effect:  $Z = 1.39$  ( $P = 0.16$ )

|                                         |           |             |             |                |               |                              |
|-----------------------------------------|-----------|-------------|-------------|----------------|---------------|------------------------------|
| <b>Fetal death (seatbelts not used)</b> |           |             |             |                |               |                              |
| Hyde 2003                               | 12        | 1099        | 2600        | 313674         | 49.8%         | 1.32 (0.75 to 2.34)          |
| Madutiu 2013                            | 60        | 443         | 5305        | 848073         | 50.2%         | 24.89 (18.93 to 32.71)       |
| <b>Subtotal (95% CI)</b>                |           | <b>1542</b> |             | <b>1161747</b> | <b>100.0%</b> | <b>5.78 (0.17 to 201.12)</b> |
| <b>Total events</b>                     | <b>72</b> |             | <b>7905</b> |                |               |                              |

Heterogeneity:  $\tau^2 = 6.51$ ;  $\chi^2 = 126.07$ ,  $df = 1$  ( $P < 0.00001$ );  $I^2 = 99\%$   
 Test for overall effect:  $Z = 0.97$  ( $P = 0.33$ )  
 Test for subgroup differences:  $\chi^2 = 1.41$ ,  $df = 1$  ( $P = 0.24$ ),  $I^2 = 28.9\%$

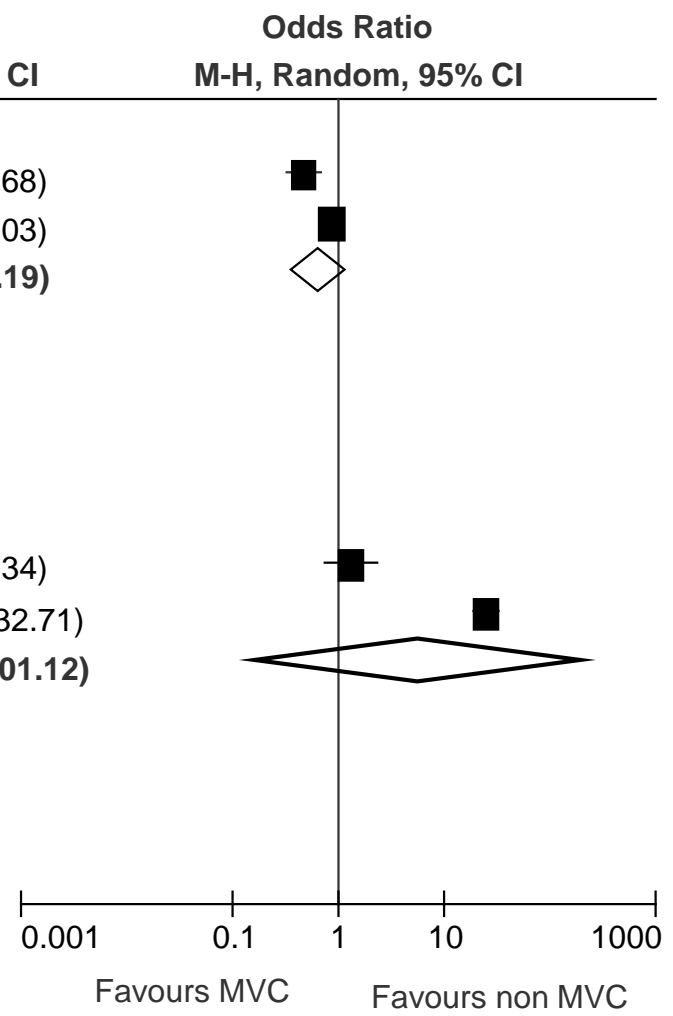

\*MVC, motor vehicle crash

## Appendix 1. Search strategy for MEDLINE (via Ovid) executed from database inception up to July 2018

| Item | Search term                                                                                                                                        |
|------|----------------------------------------------------------------------------------------------------------------------------------------------------|
| 1    | pregnancy.af.                                                                                                                                      |
| 2    | pregnan*.sh.                                                                                                                                       |
| 3    | gravity.sh.                                                                                                                                        |
| 4    | gravid*.sh.                                                                                                                                        |
| 5    | gestation*.sh.                                                                                                                                     |
| 6    | pregnant women.sh.                                                                                                                                 |
| 7    | pregnant wom#n.sh.                                                                                                                                 |
| 8    | (child adj3 bearing).tw.                                                                                                                           |
| 9    | childbearing.af.                                                                                                                                   |
| 10   | matern*.sh.                                                                                                                                        |
| 11   | vehicle* crash*.af.                                                                                                                                |
| 12   | vehicle* accident*.af.                                                                                                                             |
| 13   | vehicle* collision*.af.                                                                                                                            |
| 14   | motor vehicle crash*.af.                                                                                                                           |
| 15   | motor vehicle accident*.af.                                                                                                                        |
| 16   | motor vehicle collision*.af.                                                                                                                       |
| 17   | motor vehicle injur*.af.                                                                                                                           |
| 18   | vehicle* injur*.af.                                                                                                                                |
| 19   | road traffic crash*.af.                                                                                                                            |
| 20   | road traffic accident*.af.                                                                                                                         |
| 21   | road traffic collision*.af.                                                                                                                        |
| 22   | road traffic injur*.af.                                                                                                                            |
| 23   | auto* crash*.af.                                                                                                                                   |
| 24   | auto* accident*.af.                                                                                                                                |
| 25   | auto* collision*.af.                                                                                                                               |
| 26   | auto* injur*.af.                                                                                                                                   |
| 27   | car crash*.af.                                                                                                                                     |
| 28   | car accident*.af.                                                                                                                                  |
| 29   | car collision*.af.                                                                                                                                 |
| 30   | car injur*.af.                                                                                                                                     |
| 31   | (car adj3 trauma).af.                                                                                                                              |
| 32   | (automobile adj3 trauma).af.                                                                                                                       |
| 33   | (automotive adj3 trauma).af.                                                                                                                       |
| 34   | (road traffic adj3 trauma).af.                                                                                                                     |
| 35   | (motor vehicle adj3 trauma).af.                                                                                                                    |
| 36   | 1 or 2 or 3 or 4 or 5 or 6 or 7 or 8 or 9 or 10                                                                                                    |
| 37   | 11 or 12 or 13 or 14 or 15 or 16 or 17 or 18 or 19 or 20 or 21 or 22 or 23 or 24 or 25 or 26 or 27 or 28 or 29 or 30 or 31 or 32 or 33 or 34 or 35 |
| 38   | 36 and 37                                                                                                                                          |

## Appendix 2 List of excluded studies with reasons

| Study ID                 | Reason                                                                                                                                                 | Reference                                                                                                 |
|--------------------------|--------------------------------------------------------------------------------------------------------------------------------------------------------|-----------------------------------------------------------------------------------------------------------|
| <b>Al Mulhim, 2012</b>   | Pregnancy loss or not after trauma in Arabic pregnant women                                                                                            | <i>EMHJ. Vol. 18 No. 5 2012</i>                                                                           |
| <b>Battaloglu 2016</b>   | From a cohort of 15,140 female patients, 173 were pregnant women in the trauma registry. 55.5% of them from vehicle collision                          | <b>SR Petrone, 2017</b><br><i>Injury, Int. J. Care Injured 47 (2016) 184-187</i>                          |
| <b>Barre 2006</b>        | Pregnant women with abdominal trauma during pregnancy (n=65). Half of them from a traffic accident.                                                    | <b>SR Petrone, 2017</b><br><i>La Revue Sage-Femme. Vol 5, Issue 6, 2006, 312-316</i>                      |
| <b>Cannada 2010</b>      | Pregnant women with orthopaedic injuries (n=65)                                                                                                        | <b>SR Petrone, 2017</b><br><i>Injury, Infection, and Critical Care.2010. Vol. 69 (3)</i>                  |
| <b>Chamberlain, 2011</b> | Communication abstract. Retrospective cohort study. Identification of 272 pregnant trauma victims. 78.6% of them incurred in a MVC. No data to extract | <i>American Journal of Obstetrics &amp; Gynecology Supplement to January 2011</i>                         |
| <b>Cheng, 2012</b>       | Maternal complications during delivery according to uninjured, minor and severe injuries. 2,881 pregnant women (47,4%) involved in MVC                 | <i>World J Surg (2012) 36:2767–2775</i>                                                                   |
| <b>Connolly, 1997</b>    | 476 maternal records of trauma cases. 54.6% were MVC. No more data available                                                                           | <i>American Journal of Perinatology.1997.Vol. 14 (6)</i>                                                  |
| <b>Corsi 1999</b>        | Twenty-seven traumatised pregnant women were analysed retrospectively over a period of 9 years in Sao Paulo, Brazil                                    | <b>SR Petrone, 2017</b><br><i>Injury, Int. J. Care Injured 30 (1999) 239-243</i>                          |
| <b>Dannenberg, 1995</b>  | Homicide and other injuries as causes of maternal death between 1987 and 1991 in New York                                                              | <i>Am J Obstet Gynecol Vol.172 (5)</i>                                                                    |
| <b>Deshpande, 2017</b>   | Trauma impact on maternal mortality. Comparability between pregnant vs. non pregnant women                                                             | <i>American Journal of Obstetrics &amp; Gynecology 2017. 590.e2</i>                                       |
| <b>El Kady 2004</b>      | Retrospective cohort study of women hospitalized for Trauma in California                                                                              | <b>SR Petrone, 2017</b><br><i>American Journal of Obstetrics and Gynecology (2004) 190, 1661-8</i>        |
| <b>El Kady D, 2006</b>   | Fractures injuries on maternal/neonatal outcomes in United States                                                                                      | <b>SR Méndez -Figueroa 2013</b><br><i>American Journal of Obstetrics and Gynecology (2006) 195, 711–6</i> |
| <b>Fischer 2011</b>      | Minor trauma and poor fetal outcomes in Tennessee, Memphis                                                                                             | <b>SR Petrone, 2017</b><br><i>Injury, Infection, and Critical Care. 2011. Vol. 71 (1)</i>                 |
| <b>Gibbins, 2017</b>     | Communication. MVC and Stillbirth. Secondary analysis of 439 stillbirth                                                                                | <i>American Journal of Obstetrics &amp; Gynecology Supplement to January 2017</i>                         |
| <b>Goodwin, 1990</b>     | Case-series of trauma pregnant women between 1987 and 1988 in Los Angeles                                                                              | <b>SR Méndez -Figueroa 2013</b><br><i>Am J Obstet Gynecol. 1990 Vol. 162 (3).</i>                         |

|                          |                                                                                                                                                                                            |                                                                                                               |
|--------------------------|--------------------------------------------------------------------------------------------------------------------------------------------------------------------------------------------|---------------------------------------------------------------------------------------------------------------|
| <b>Hardt, 2013</b>       | Prenatal risk screening to identify women at increased risk for traumatic pregnancy-associated death                                                                                       | <i>Women's Health Issues</i> 23-3 (2013) e187–e193                                                            |
| <b>Hardy, 1974</b>       | Maternal mortality ratios at large urban charity hospitals from 1941 to 1971                                                                                                               | <i>Obstetric and Gynecology.</i> 1974. Vol.43 (1)                                                             |
| <b>Harland 2014</b>      | Risks factors of maternal injuries in a population-based sample of pregnant women from Iowa                                                                                                | <b>SR Petrone, 2017</b><br><i>Journal of Women's Health.</i> 2014. Vol. 23 (12)                               |
| <b>Hitosugi 2006</b>     | 135 traffic accidents involving Japanese pregnant women from insurance companies. The outcomes of neonates determined by their condition 1 month after birth (death/abortion/healthy)      | <b>SR Petrone, 2017</b><br><i>Forensic Science International</i> 159 (2006) 51-54                             |
| <b>Ikossi, 2005</b>      | Risks factors of trauma in pregnant women from San Francisco, California                                                                                                                   | <i>J Am Coll Surg.</i> Vol. 2005. 200 (1)                                                                     |
| <b>Lynch, 2011</b>       | Pregnancy associated- death in Ohio: 2003-2007                                                                                                                                             | American Journal of Obstetrics & Gynecology Supplement to January 2011                                        |
| <b>Manoogian, 2015</b>   | Injuries characteristics between pregnant vs non pregnant women occupants (not outcome)                                                                                                    | <i>Accident Analysis and Prevention</i> 74 (2015). 69–76                                                      |
| <b>Melamed 2012</b>      | Outcomes following blunt trauma in Pregnant women from Israel                                                                                                                              | <b>SR Petrone, 2017</b><br><i>The Journal of Maternal-Fetal and Neonatal Medicine.</i> 2012; 25(9): 1612–1617 |
| <b>Mesdaghinia, 2012</b> | Causes of trauma in 32 pregnant women with trauma in a Hospital in Iran                                                                                                                    | <i>Arch Trauma Res.</i> 2012;1(1):23-26                                                                       |
| <b>Nannini, 2008</b>     | Risks of injury in pregnant women in Massachuset                                                                                                                                           | <i>Journal of Midwifery &amp; Women's Health.</i> 2008. Vol.53 (1)                                            |
| <b>Omoke, 2013</b>       | Trauma during pregnancy in a Nigerian setting                                                                                                                                              | <i>Int J Crit Illn Inj Sci.</i> 2013; 3(4): 269–273.                                                          |
| <b>Osei-Ampofo, 2016</b> | A cross-sectional study with 134 pregnant women from Ghana visiting the emergency care. Leading injury MVC (23%). Not outcomes                                                             | <i>African Journal of Emergency Medicine</i> (2016) 6, 87 –93                                                 |
| <b>Pak, 1998</b>         | Delivery outcomes after a blunt abdominal trauma in 85 pregnant women                                                                                                                      | <i>Am J Obstet Gynecol.</i> 1998. Vol. 179 (5)                                                                |
| <b>Patteson, 2007</b>    | High risk factors involved in trauma during pregnancy. Not outcomes                                                                                                                        | <i>The Journal of TRAUMA Injury, Infection, and Critical Care.</i> 2007. Vol 62 (4)                           |
| <b>Pearlman, 1990</b>    | Not possible to assess full text                                                                                                                                                           | SR Méndez -Figuroa 2013                                                                                       |
| <b>Schiff, 1997</b>      | Seat Bealt use. Protective factor of maternal mortality after a MVC in Mexico                                                                                                              | <i>WJM,</i> 1997. Vol. 167 (1)                                                                                |
| <b>Schuster, 2016</b>    | Communication abstract. Impact of blunt trauma on maternal and pregnancy outcome. MVC the most common injury mechanism (70%). Pennsylvania Trauma Systems Foundation Database (1996-2013). | <i>American Journal of Obstetrics &amp; Gynecology. Supplement to January 2016</i>                            |
| <b>Schuster, 2018</b>    | Pennsylvania Trauma Systems Foundation Database. ISS>9 and SBP<90mmHg are predictors for poor outcomes after trauma during pregnancy                                                       | <i>Trauma,</i> 2018. Vol. 20(1) 30–37                                                                         |

|                            |                                                                                                                               |                                                                                                                                        |
|----------------------------|-------------------------------------------------------------------------------------------------------------------------------|----------------------------------------------------------------------------------------------------------------------------------------|
| <b>Sela, 2011</b>          | Treatment provided to pregnant motor vehicle accident (MVA) casualties in a mature trauma system in Israel                    | <i>Annals of Surgery, 2011.Vol.254 (2)</i>                                                                                             |
| <b>Shah, 1998</b>          | Trauma in general in pregnant women                                                                                           | <i>J Trauma. 1998 Jul;45(1):83-6</i>                                                                                                   |
| <b>Shakerian 2015</b>      | Determining adherence to recommended imaging guidelines in pregnant women from Victoria, Australia                            | <b>SR Petrone, 2017</b><br><i>J Trauma Acute Care Surg. 2015.Vol. 78 (1)</i>                                                           |
| <b>Shiff 2002</b>          | Retrospective cohort study to assess outcomes of pregnant women hospitalized for injury in Washington State from 1989 to 1997 | <b>SR Petrone, 2017</b><br><i>J Trauma. 2002; 53: 939–945.</i>                                                                         |
| <b>Sirin, 2007</b>         | Report the prevalence of seatbelt counselling by prenatal care providers during pregnancy in USA                              | <i>Matern Child Health J (2007) 11:505–510</i>                                                                                         |
| <b>Tinker 2010</b>         | Risks factors involved in injuries in pregnant women from the National Birth Defects Prevention Study, USA                    | <b>SR Petrone, 2017</b><br><i>Journal of Women’s Health. 2010. Vol. 19 (2)</i>                                                         |
| <b>Van der Knoop, 2015</b> | Effect of maternal trauma in fetal motility at term and at one year of age                                                    | <i>Early Human Development 91 (2015) 511–517</i>                                                                                       |
| <b>Van der Knoop, 2018</b> | Matched case-control study. Neurobehavioral outcome in 6-18 year old children after trauma in pregnancy                       | <i>European Journal of Paediatric Neurology (2018), 22(5):845-853</i>                                                                  |
| <b>Vladutiu, 2013b</b>     | Same sample Vladutiu 2013a; excluded as a secondary analysis from already included study                                      | <i>Accid Anal Prev. 2013; 55: 165–171</i>                                                                                              |
| <b>Wahabi, 2007</b>        | 45 MVC case series pregnant women collected over a 10- year period                                                            | <i>Saudi Med J. 2007. Vol. 28 (9)</i>                                                                                                  |
| <b>Wall 2014</b>           | Pregnant trauma patients from South Africa (mainly assaults)                                                                  | <b>SR Petrone, 2017</b><br><i>Injury, Int. J. Care Injured 45 (2014) 1220–1223</i>                                                     |
| <b>Weiner 2016</b>         | Minor trauma during pregnancy, not associated with adverse pregnancy outcomes, Israel                                         | <b>SR Petrone, 2017</b><br><i>European Journal Of Obstetrics &amp; Gynecology and Reproductive Biology 203 (2016): 78–81</i>           |
| <b>Weiss, 1999</b>         | Retrospect review of death certificates                                                                                       | <i>43rd Annual Proceedings Association for the Advancement of Automotive Medicine September 20-21, 1999. Barcelona (Sitges), Spain</i> |
| <b>Weiss, 2001</b>         | Retrospect review of death certificates                                                                                       | <i>JAMA, 2001. Vol. 286 (15)</i>                                                                                                       |
| <b>Weiss, 2002a</b>        | N/A                                                                                                                           |                                                                                                                                        |
| <b>Zangene, 2015</b>       | 102 cases of trauma in pregnancy registered in Iran from 2007 to 2010. MVC the most frequent (45%)                            | <i>Global Journal of Health Science. 2015. Vol 7 (2)</i>                                                                               |



## maternal outcomes

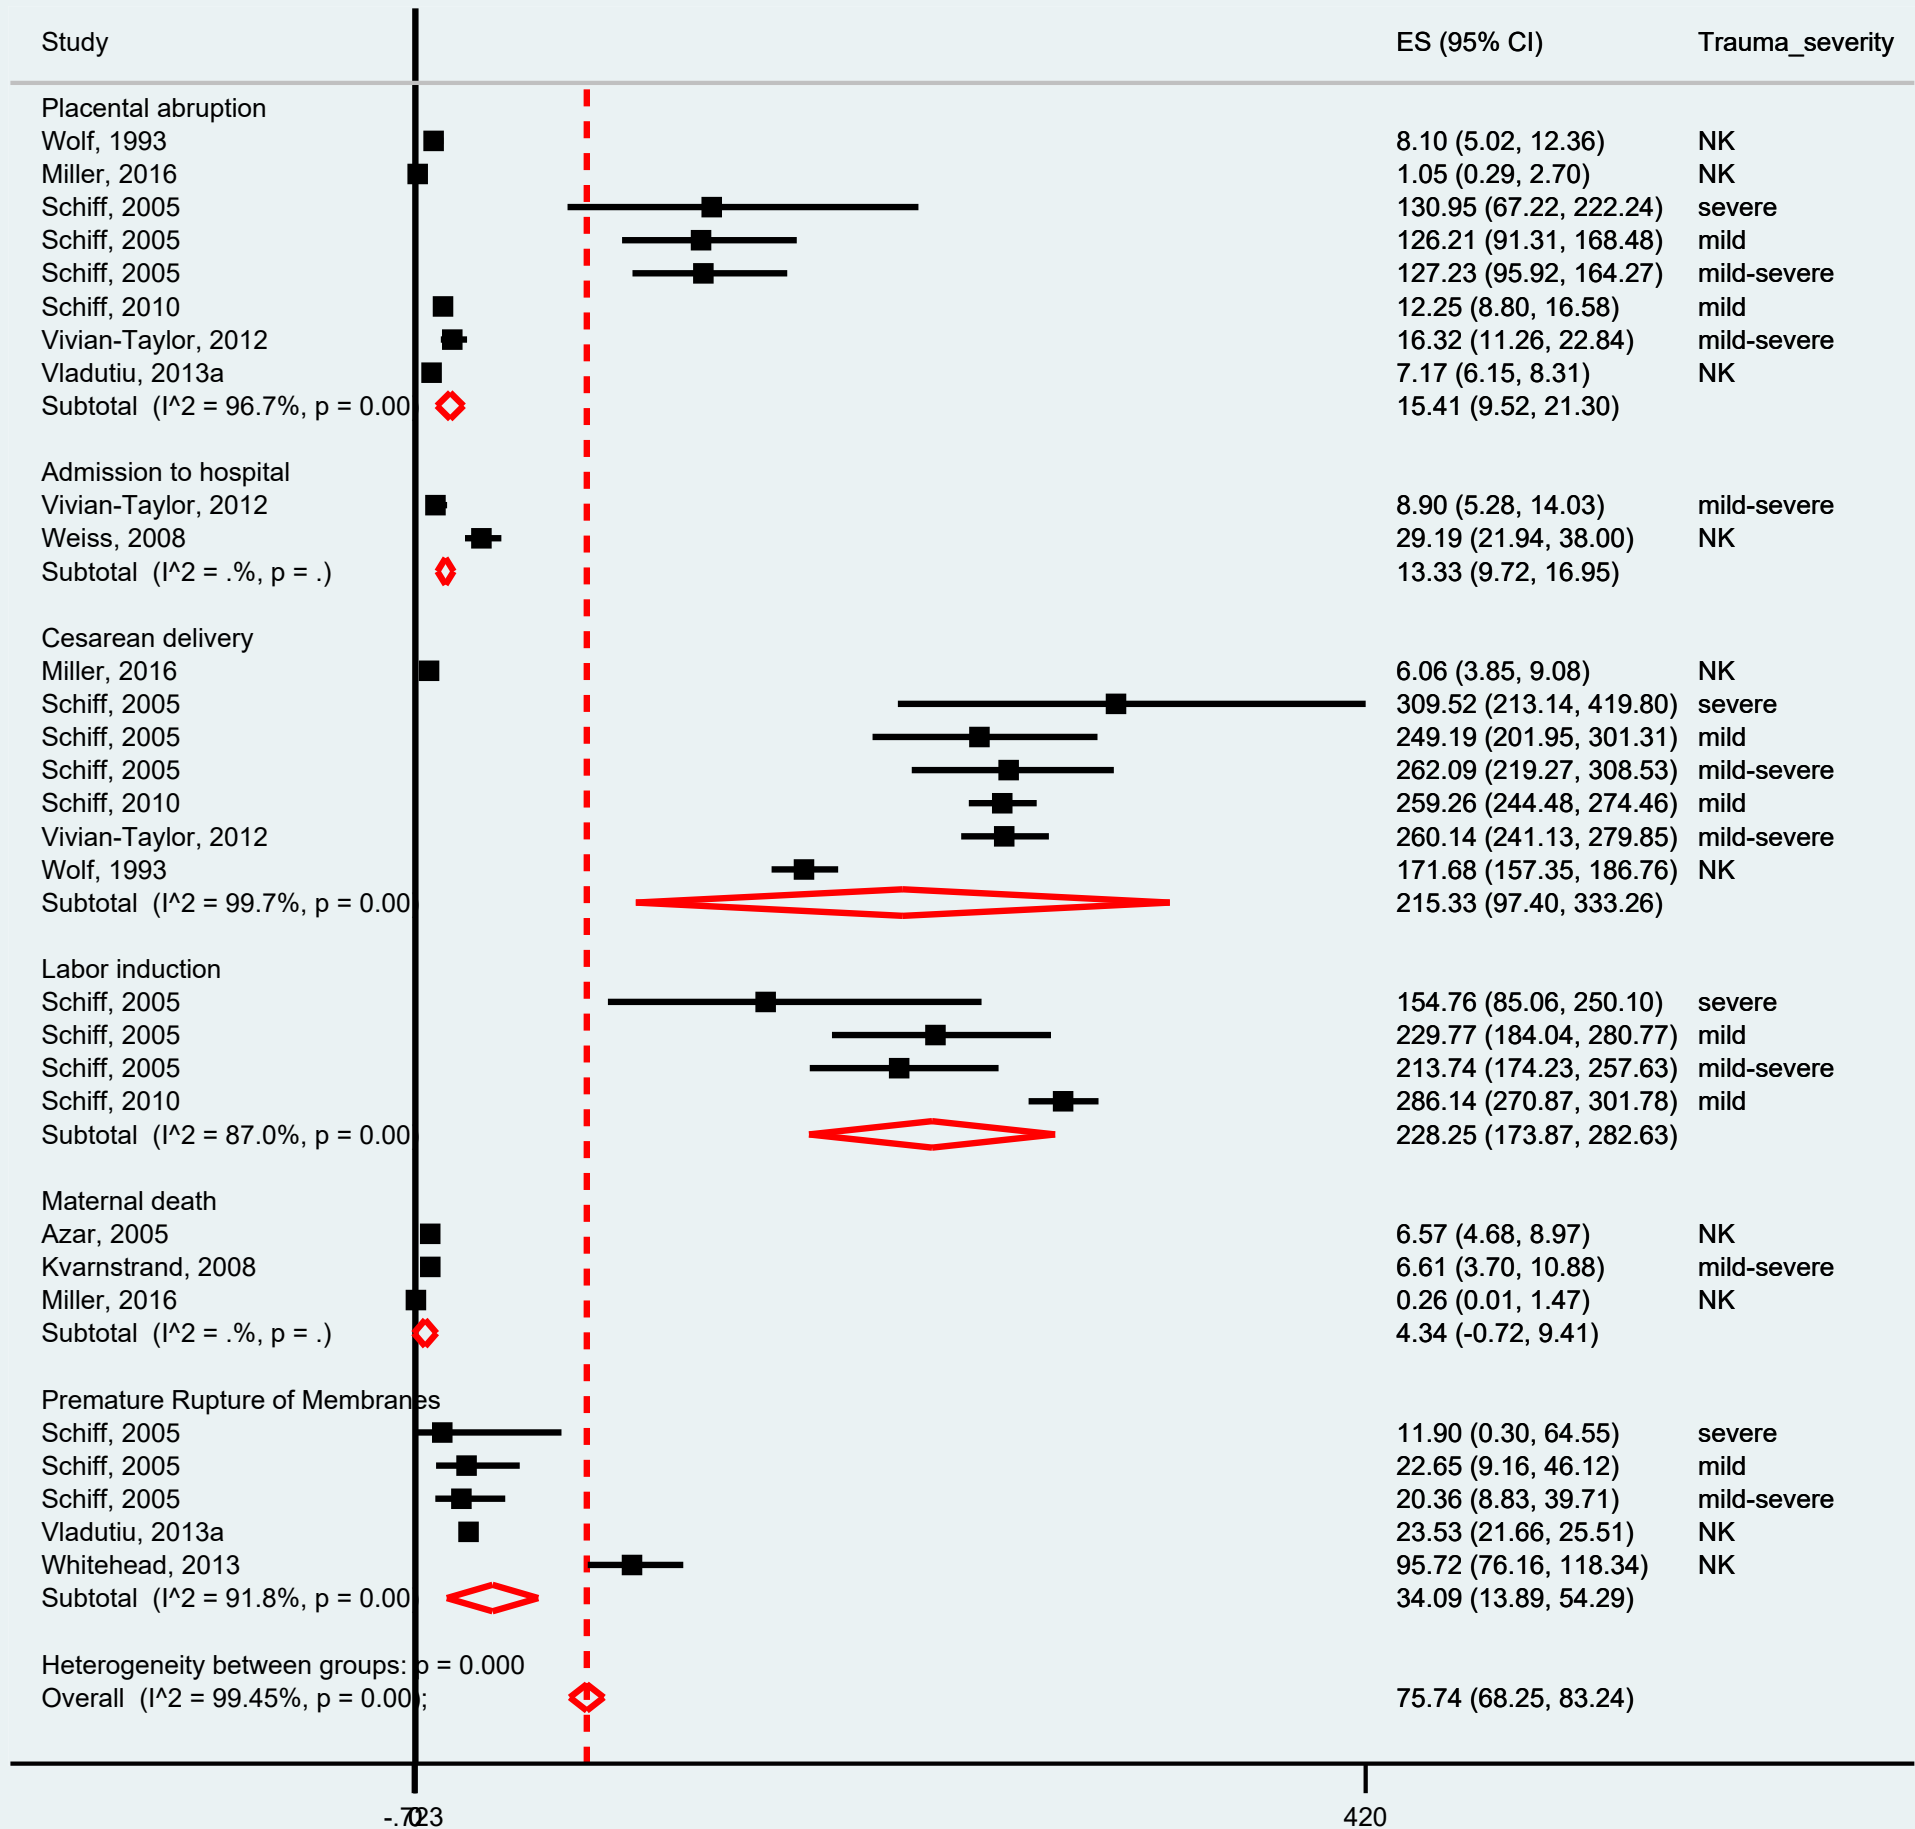

-0.723

420

Proportion

# offspring outcomes

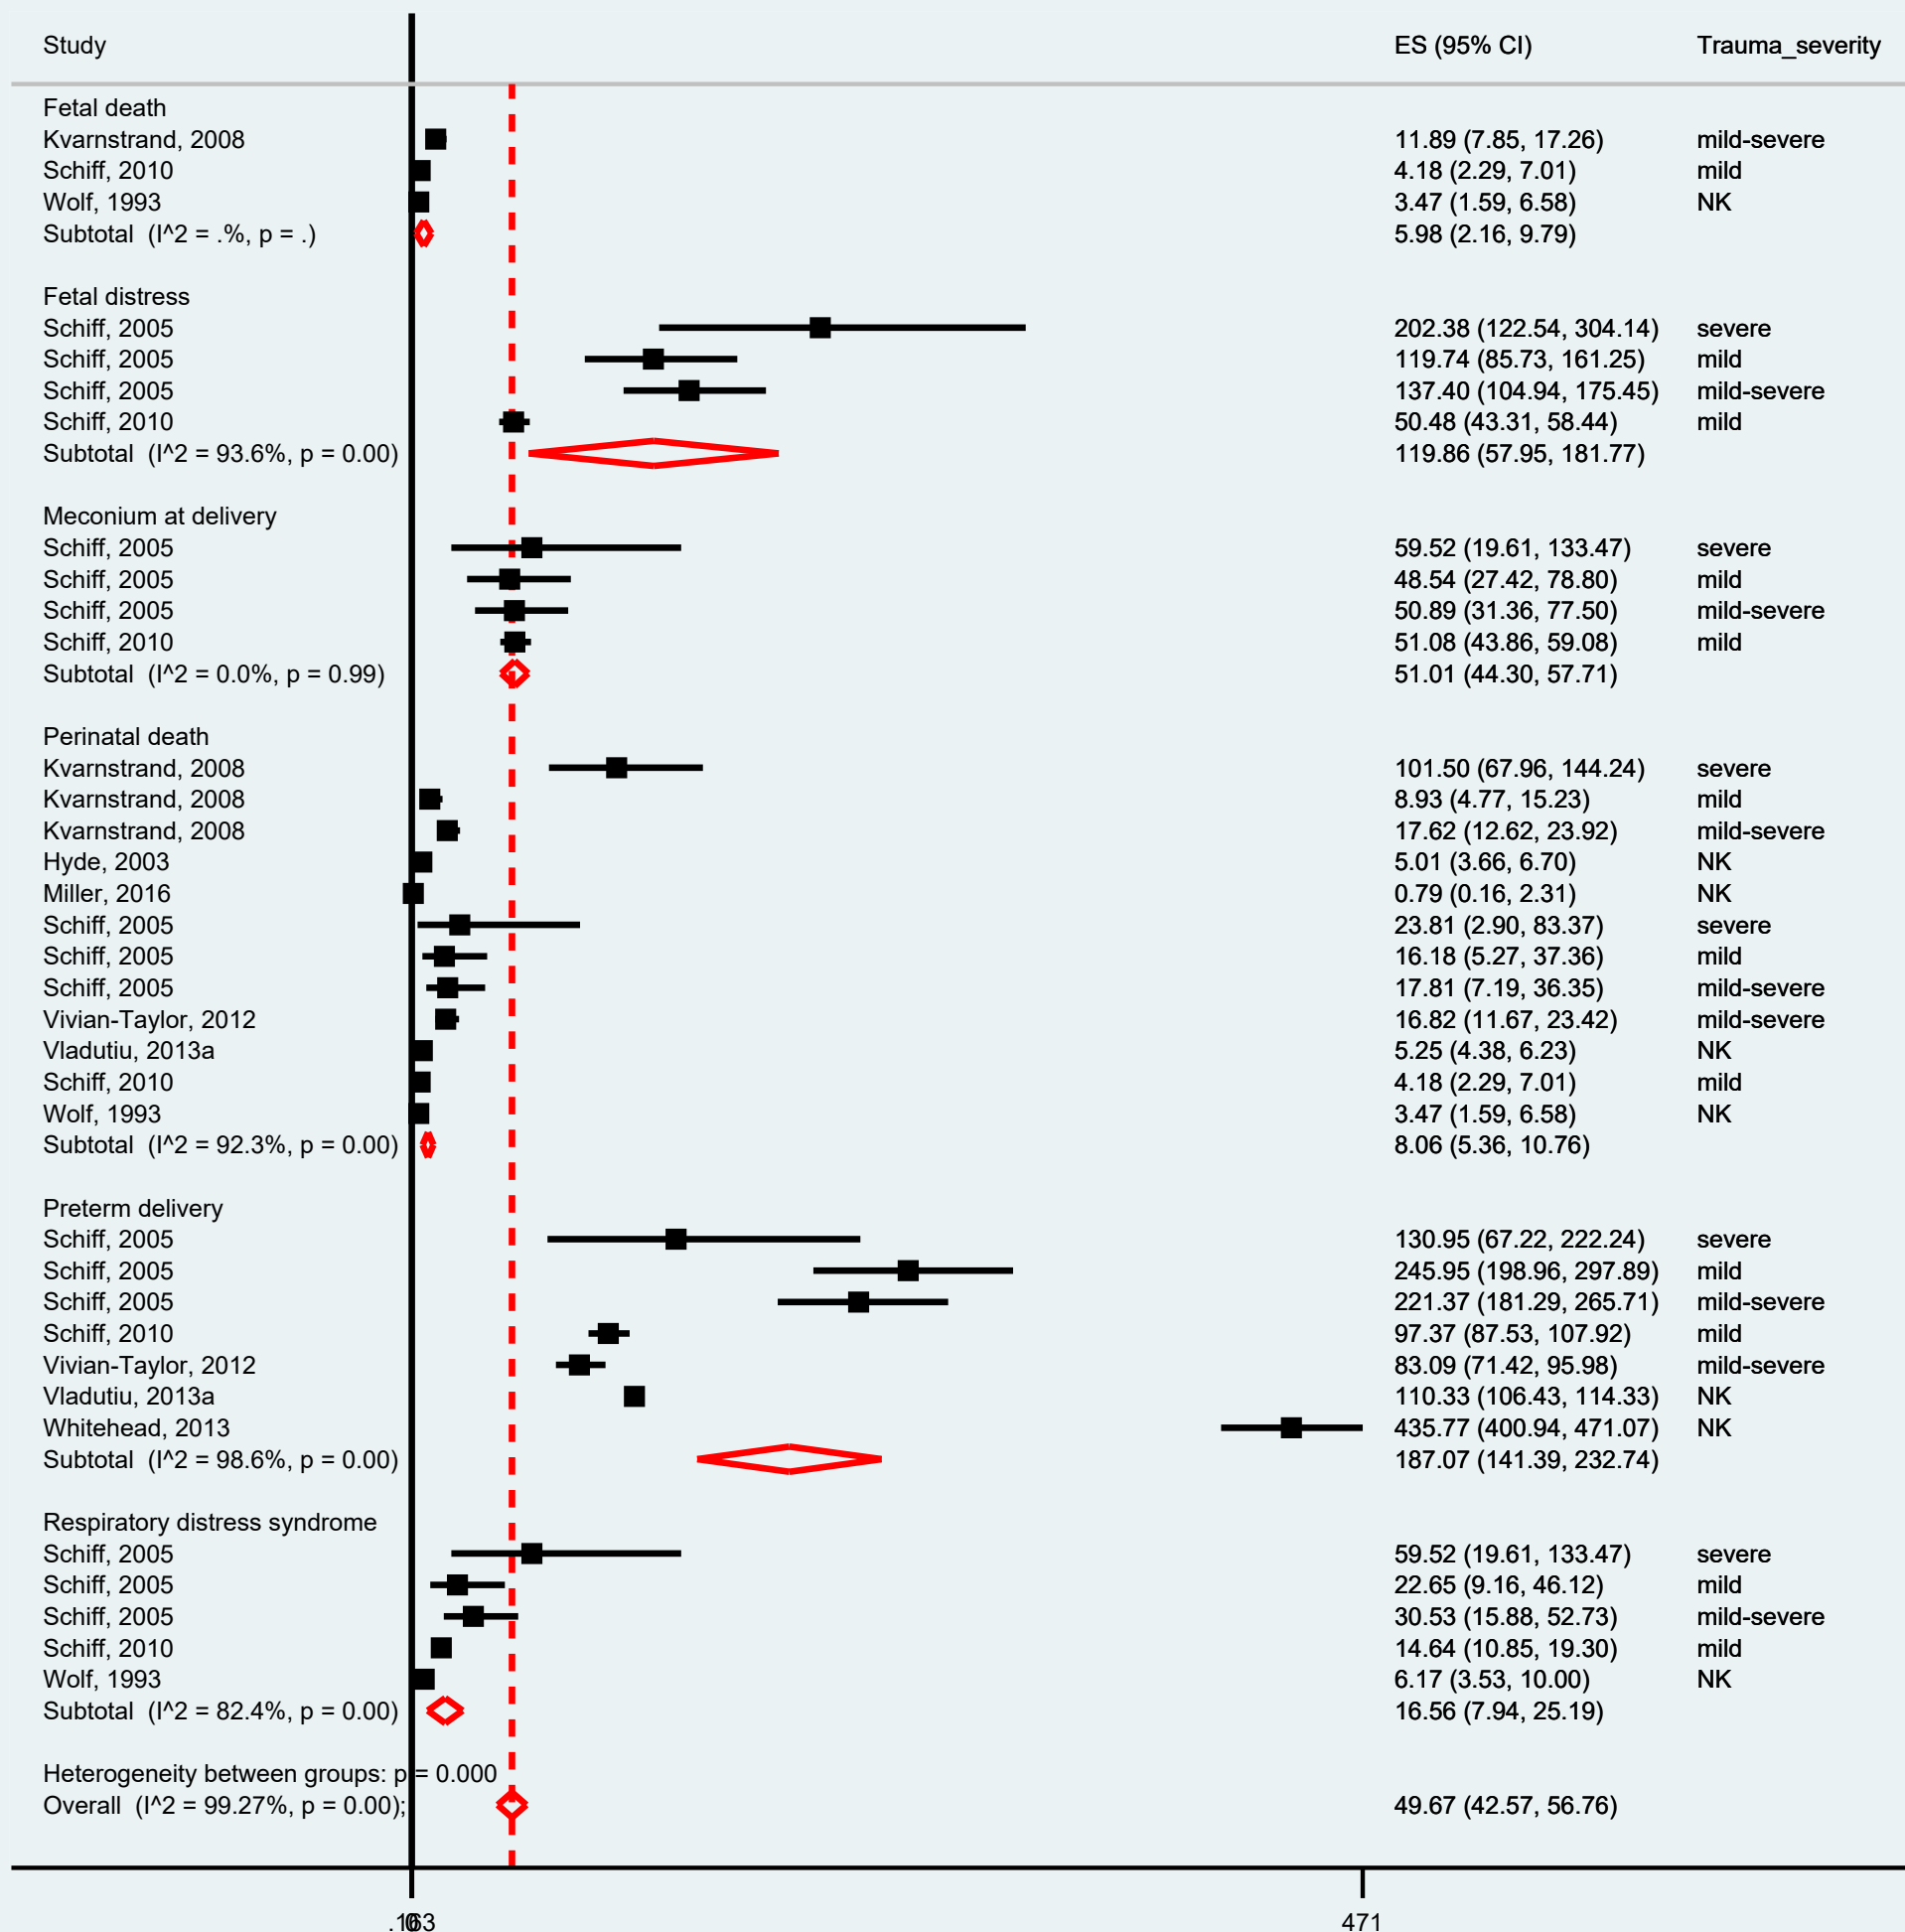

## Appendix 5. Incidence of maternal, fetal &amp; neonatal complications from single studies

| Outcome                           | Total sample size | Incidence estimate per 1,000 women (95%CI) |
|-----------------------------------|-------------------|--------------------------------------------|
| <b>Maternal outcomes</b>          |                   |                                            |
| Placental problems                | 235329            | 100.00 (98.79, 101.22)                     |
| Miscarriage                       | 3794              | 1.85 (0.74, 3.80)                          |
| Antepartum haemorrhage            | 2022              | 47.48 (38.62, 57.67)                       |
| Postpartum haemorrhage            | 2022              | 77.65 (66.35, 90.18)                       |
| Vaginal bleeding                  | 235329            | 247.00 (245.26, 248.75)                    |
| Hospital stay $\geq 6$ days       | 5936              | 117.92 (109.82, 126.40)                    |
| Maternal death or hospitalisation | 32810             | 135.05 (131.37, 138.80)                    |
| <b>Fetal and neonatal</b>         |                   |                                            |
| Hypoxia                           | 582               | 22.34 (11.95, 37.89)                       |
| Neonatal death                    | 2270              | 5.73 (3.05, 9.77)                          |
| Neonatal transfer                 | 2022              | 42.53 (34.16, 52.26)                       |

## Appendix 6. Incidence in non-population level data

| Outcome                      | Study ID            | Number of events | Group size | Trauma severity level |
|------------------------------|---------------------|------------------|------------|-----------------------|
| <b>Admission to hospital</b> | Brookfield, 2013    | 182              | 256        | Not given             |
|                              | Chibber, 2015       | 648              | 728        | Not given             |
| <b>Caesarean delivery</b>    | Chibber, 2015       | 529              | 728        | Not given             |
|                              | Luley 2013          | 32               | 126        | Not given             |
|                              | Orji, 2002          | 2                | 84         | Not given             |
| <b>Fetal death</b>           | Aboutanos, 2007     | 1                | 148        | Not given             |
|                              | Chibber, 2015       | 78               | 728        | Not given             |
| <b>Fetal distress</b>        | Chibber, 2015       | 412              | 728        | Not given             |
| <b>Fetal tachycardia</b>     | Orji, 2002          | 10               | 84         | Not given             |
| <b>Hydrops fetalis</b>       | Aboutanos, 2007     | 1                | 148        | Not given             |
| <b>Maternal death</b>        | Aboutanos, 2007     | 0                | 148        | Not given             |
|                              | Baerga-Varela, 2000 | 1                | 39         | Severe                |
|                              | Brookfield, 2013    | 7                | 256        | Not given             |
|                              | Chibber, 2015       | 100              | 728        | Not given             |
| <b>Maternal death</b>        | Orji, 2002          | 2                | 84         | Not given             |
| <b>Miscarriage</b>           | Aboutanos, 2007     | 5                | 148        | Not given             |
|                              | Baerga-Varela, 2000 | 7                | 39         | Mild to severe        |
| <b>Perinatal death</b>       | Baerga-Varela, 2000 | 23               | 39         | Mild to severe        |
|                              | Luley 2013          | 6                | 126        | Not given             |
|                              | Orji, 2002          | 3                | 84         | Not given             |
| <b>Placental abruption</b>   | Chibber, 2015       | 428              | 728        | Not given             |
|                              | Luley 2013          | 7                | 126        | Not given             |
|                              | Orji, 2002          | 1                | 84         | Not given             |
| <b>Preterm delivery</b>      | Chibber, 2015       | 97               | 728        | Not given             |
| <b>Uterine rupture</b>       | Chibber, 2015       | 12               | 728        | Not given             |
|                              | Orji, 2002          | 1                | 84         | Not given             |

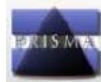

# PRISMA 2009 Checklist

| Section/topic                      | #  | Checklist item                                                                                                                                                                                                                                                                                              | Reported on page # |
|------------------------------------|----|-------------------------------------------------------------------------------------------------------------------------------------------------------------------------------------------------------------------------------------------------------------------------------------------------------------|--------------------|
| <b>TITLE</b>                       |    |                                                                                                                                                                                                                                                                                                             |                    |
| Title                              | 1  | Identify the report as a systematic review, meta-analysis, or both.                                                                                                                                                                                                                                         | 1                  |
| <b>ABSTRACT</b>                    |    |                                                                                                                                                                                                                                                                                                             |                    |
| Structured summary                 | 2  | Provide a structured summary including, as applicable: background; objectives; data sources; study eligibility criteria, participants, and interventions; study appraisal and synthesis methods; results; limitations; conclusions and implications of key findings; systematic review registration number. | 2-3                |
| <b>INTRODUCTION</b>                |    |                                                                                                                                                                                                                                                                                                             |                    |
| Rationale                          | 3  | Describe the rationale for the review in the context of what is already known.                                                                                                                                                                                                                              | 4                  |
| Objectives                         | 4  | Provide an explicit statement of questions being addressed with reference to participants, interventions, comparisons, outcomes, and study design (PICOS).                                                                                                                                                  | 5                  |
| <b>METHODS</b>                     |    |                                                                                                                                                                                                                                                                                                             |                    |
| Protocol and registration          | 5  | Indicate if a review protocol exists, if and where it can be accessed (e.g., Web address), and, if available, provide registration information including registration number.                                                                                                                               | 5                  |
| Eligibility criteria               | 6  | Specify study characteristics (e.g., PICOS, length of follow-up) and report characteristics (e.g., years considered, language, publication status) used as criteria for eligibility, giving rationale.                                                                                                      | 5-7                |
| Information sources                | 7  | Describe all information sources (e.g., databases with dates of coverage, contact with study authors to identify additional studies) in the search and date last searched.                                                                                                                                  | 5                  |
| Search                             | 8  | Present full electronic search strategy for at least one database, including any limits used, such that it could be repeated.                                                                                                                                                                               | Appendix 1         |
| Study selection                    | 9  | State the process for selecting studies (i.e., screening, eligibility, included in systematic review, and, if applicable, included in the meta-analysis).                                                                                                                                                   | 5                  |
| Data collection process            | 10 | Describe method of data extraction from reports (e.g., piloted forms, independently, in duplicate) and any processes for obtaining and confirming data from investigators.                                                                                                                                  | 6                  |
| Data items                         | 11 | List and define all variables for which data were sought (e.g., PICOS, funding sources) and any assumptions and simplifications made.                                                                                                                                                                       | 5-7                |
| Risk of bias in individual studies | 12 | Describe methods used for assessing risk of bias of individual studies (including specification of whether this was done at the study or outcome level), and how this information is to be used in any data synthesis.                                                                                      | 8                  |
| Summary measures                   | 13 | State the principal summary measures (e.g., risk ratio, difference in means).                                                                                                                                                                                                                               | 8                  |
| Synthesis of results               | 14 | Describe the methods of handling data and combining results of studies, if done, including measures of consistency (e.g., $I^2$ for each meta-analysis).                                                                                                                                                    | 8                  |

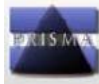

# PRISMA 2009 Checklist

Page 1 of 2

| Section/topic                 | #  | Checklist item                                                                                                                                                                                           | Reported on page # |
|-------------------------------|----|----------------------------------------------------------------------------------------------------------------------------------------------------------------------------------------------------------|--------------------|
| Risk of bias across studies   | 15 | Specify any assessment of risk of bias that may affect the cumulative evidence (e.g., publication bias, selective reporting within studies).                                                             | 8                  |
| Additional analyses           | 16 | Describe methods of additional analyses (e.g., sensitivity or subgroup analyses, meta-regression), if done, indicating which were pre-specified.                                                         | 8                  |
| <b>RESULTS</b>                |    |                                                                                                                                                                                                          |                    |
| Study selection               | 17 | Give numbers of studies screened, assessed for eligibility, and included in the review, with reasons for exclusions at each stage, ideally with a flow diagram.                                          | 9                  |
| Study characteristics         | 18 | For each study, present characteristics for which data were extracted (e.g., study size, PICOS, follow-up period) and provide the citations.                                                             | 9                  |
| Risk of bias within studies   | 19 | Present data on risk of bias of each study and, if available, any outcome level assessment (see item 12).                                                                                                | -                  |
| Results of individual studies | 20 | For all outcomes considered (benefits or harms), present, for each study: (a) simple summary data for each intervention group (b) effect estimates and confidence intervals, ideally with a forest plot. | 9                  |
| Synthesis of results          | 21 | Present results of each meta-analysis done, including confidence intervals and measures of consistency.                                                                                                  | 10                 |
| Risk of bias across studies   | 22 | Present results of any assessment of risk of bias across studies (see Item 15).                                                                                                                          | 9                  |
| Additional analysis           | 23 | Give results of additional analyses, if done (e.g., sensitivity or subgroup analyses, meta-regression [see Item 16]).                                                                                    | 10                 |
| <b>DISCUSSION</b>             |    |                                                                                                                                                                                                          |                    |
| Summary of evidence           | 24 | Summarize the main findings including the strength of evidence for each main outcome; consider their relevance to key groups (e.g., healthcare providers, users, and policy makers).                     | 11                 |
| Limitations                   | 25 | Discuss limitations at study and outcome level (e.g., risk of bias), and at review-level (e.g., incomplete retrieval of identified research, reporting bias).                                            | 11                 |
| Conclusions                   | 26 | Provide a general interpretation of the results in the context of other evidence, and implications for future research.                                                                                  | 13                 |
| <b>FUNDING</b>                |    |                                                                                                                                                                                                          |                    |
| Funding                       | 27 | Describe sources of funding for the systematic review and other support (e.g., supply of data); role of funders for the systematic review.                                                               | 3                  |

From: Moher D, Liberati A, Tetzlaff J, Altman DG, The PRISMA Group (2009). Preferred Reporting Items for Systematic Reviews and Meta-Analyses: The PRISMA Statement. PLoS Med 6(7): e1000097. doi:10.1371/journal.pmed1000097

For more information, visit: [www.prisma-statement.org](http://www.prisma-statement.org).

Page 2 of 2

For peer review only - <http://bmjopen.bmj.com/site/about/guidelines.xhtml>

# BMJ Open

## Maternal trauma due to motor vehicle crashes and pregnancy outcomes: A systematic review and meta-analysis

|                                 |                                                                                                                                                                                                                                                                                                                                                                                                                                                                                                                                                                                                                                                                                                                                                                                                                                                                                                                                                                                                                                                                                                                                                                                                                           |
|---------------------------------|---------------------------------------------------------------------------------------------------------------------------------------------------------------------------------------------------------------------------------------------------------------------------------------------------------------------------------------------------------------------------------------------------------------------------------------------------------------------------------------------------------------------------------------------------------------------------------------------------------------------------------------------------------------------------------------------------------------------------------------------------------------------------------------------------------------------------------------------------------------------------------------------------------------------------------------------------------------------------------------------------------------------------------------------------------------------------------------------------------------------------------------------------------------------------------------------------------------------------|
| Journal:                        | <i>BMJ Open</i>                                                                                                                                                                                                                                                                                                                                                                                                                                                                                                                                                                                                                                                                                                                                                                                                                                                                                                                                                                                                                                                                                                                                                                                                           |
| Manuscript ID                   | bmjopen-2019-035562.R1                                                                                                                                                                                                                                                                                                                                                                                                                                                                                                                                                                                                                                                                                                                                                                                                                                                                                                                                                                                                                                                                                                                                                                                                    |
| Article Type:                   | Original research                                                                                                                                                                                                                                                                                                                                                                                                                                                                                                                                                                                                                                                                                                                                                                                                                                                                                                                                                                                                                                                                                                                                                                                                         |
| Date Submitted by the Author:   | 03-Apr-2020                                                                                                                                                                                                                                                                                                                                                                                                                                                                                                                                                                                                                                                                                                                                                                                                                                                                                                                                                                                                                                                                                                                                                                                                               |
| Complete List of Authors:       | Amezcuca-Prieto, Carmen; University of Granada, Department of Preventive Medicine and Public Health, School of Medicine<br>Ross, Jennifer; Centre for Trauma Sciences, Blizard Institute, Barts and the London School of Medicine and Dentistry<br>Rogozińska, Ewelina; Queen Mary University of London, Women's Health Research Unit, Barts and the London School of Medicine and Dentistry, Queen Mary University of London; Meta-analysis Group, MRC Clinical Trials Unit, University College London, London, United Kingdom<br>Mighiu, Patricia; Queen Mary University of London, Yvonne Carter Building, E12AB London, United Kingdom<br>Martínez-Ruiz, Virginia; University of Granada, Preventive Medicine and Public Health<br>Brohi, Karim; Queen Mary University of London, Centre for Trauma Sciences; Barts Health NHS Trust<br>Bueno Cavanillas, Aurora; Universidad de Granada, Medicina Preventiva y Salud Pública<br>Khan, Khalid; Women's Health Research Unit; University of Granada, Preventive Medicine and Public Health<br>Thangaratinam, Shakila; Birmingham Womens Hospital; Queen Mary University of London, Women's Health Research Unit, Barts and the London School of Medicine and Dentistry |
| <b>Primary Subject Heading</b>: | Public health                                                                                                                                                                                                                                                                                                                                                                                                                                                                                                                                                                                                                                                                                                                                                                                                                                                                                                                                                                                                                                                                                                                                                                                                             |
| Secondary Subject Heading:      | Obstetrics and gynaecology, Medical publishing and peer review                                                                                                                                                                                                                                                                                                                                                                                                                                                                                                                                                                                                                                                                                                                                                                                                                                                                                                                                                                                                                                                                                                                                                            |
| Keywords:                       | ACCIDENT & EMERGENCY MEDICINE, EPIDEMIOLOGY, OBSTETRICS                                                                                                                                                                                                                                                                                                                                                                                                                                                                                                                                                                                                                                                                                                                                                                                                                                                                                                                                                                                                                                                                                                                                                                   |
|                                 |                                                                                                                                                                                                                                                                                                                                                                                                                                                                                                                                                                                                                                                                                                                                                                                                                                                                                                                                                                                                                                                                                                                                                                                                                           |

SCHOLARONE™  
Manuscripts



I, the Submitting Author has the right to grant and does grant on behalf of all authors of the Work (as defined in the below author licence), an exclusive licence and/or a non-exclusive licence for contributions from authors who are: i) UK Crown employees; ii) where BMJ has agreed a CC-BY licence shall apply, and/or iii) in accordance with the terms applicable for US Federal Government officers or employees acting as part of their official duties; on a worldwide, perpetual, irrevocable, royalty-free basis to BMJ Publishing Group Ltd ("BMJ") its licensees and where the relevant Journal is co-owned by BMJ to the co-owners of the Journal, to publish the Work in this journal and any other BMJ products and to exploit all rights, as set out in our [licence](#).

The Submitting Author accepts and understands that any supply made under these terms is made by BMJ to the Submitting Author unless you are acting as an employee on behalf of your employer or a postgraduate student of an affiliated institution which is paying any applicable article publishing charge ("APC") for Open Access articles. Where the Submitting Author wishes to make the Work available on an Open Access basis (and intends to pay the relevant APC), the terms of reuse of such Open Access shall be governed by a Creative Commons licence – details of these licences and which [Creative Commons](#) licence will apply to this Work are set out in our licence referred to above.

Other than as permitted in any relevant BMJ Author's Self Archiving Policies, I confirm this Work has not been accepted for publication elsewhere, is not being considered for publication elsewhere and does not duplicate material already published. I confirm all authors consent to publication of this Work and authorise the granting of this licence.



1  
2  
3 **1 Maternal trauma due to motor vehicle crashes and pregnancy outcomes: A systematic review**  
4 **and meta-analysis**  
5  
6  
7

8 *Amezcuca-Prieto C<sup>1,2,3</sup>, Ross J<sup>4</sup>, Rogozińska E,<sup>5,6</sup>Mighiu P<sup>5</sup>, Martínez-Ruiz V<sup>1,2,3</sup>, Brohi K<sup>4</sup>, Bueno-*  
9 *Cavanillas A<sup>1,2,3\*</sup>, Khan KS<sup>1,5</sup>, Thangaratinam S<sup>5</sup>*  
10  
11  
12  
13

14 <sup>1</sup>*Department of Preventive Medicine and Public Health. Faculty of Medicine. University of Granada.*  
15 *Avenida de la Investigación, 11; 18071 Granada, Spain*  
16

17 <sup>2</sup>*CIBER de Epidemiología y Salud Pública. (CIBERESP), Granada, Spain*  
18

19 <sup>3</sup>*Instituto de Investigación Biosanitaria ibs.GRANADA, Granada, Spain*  
20

21 <sup>4</sup>*Centre for Trauma Sciences, Queen Mary University of London, London, United Kingdom*  
22

23 <sup>5</sup>*Women's Health Research Unit, Barts and the London School of Medicine and Dentistry, London,*  
24 *United Kingdom*

25 <sup>6</sup>*Meta-analysis Group, MRC Clinical Trials Unit, University College London, London, United*  
26 *Kingdom*  
27  
28  
29

30 **18 Correspondence to:**

31 **19 Aurora Bueno-Cavanillas, PhD, Professor**

32 Professor of Preventive Medicine and Public Health

33 Department of Preventive Medicine and Public Health, Faculty of Medicine, The University of  
34 Granada, Avenida de la Investigación, 11; 18016 Granada, Spain

35 CIBER de Epidemiología y Salud Pública. (CIBERESP), Granada, Spain,

36 Instituto de Investigación Biosanitaria ibs.GRANADA, Granada, Spain  
37

38 Email: [abueno@ugr.es](mailto:abueno@ugr.es)  
39  
40  
41  
42  
43  
44  
45  
46  
47  
48  
49  
50  
51  
52  
53  
54  
55  
56  
57  
58  
59  
60

1  
2  
3 **28 Abstract**

4  
5 **29 Objectives**

6  
7 30 To systematically review and quantify the effect of motor vehicle crashes (MVC) in pregnancy on  
8  
9 31 maternal and offspring outcomes.

10  
11 **32 Design**

12  
13 33 Systematic review and meta-analysis of observational data searched from inception until July 1, 2018.  
14  
15 34 Searching was from June to August 2018 in Medline, Embase, Web of Science, Scopus, LILACS  
16  
17 35 SciELO, TRANSPORT, IRRD, TRANSDOC, CDSR, and Cochrane Central Register CENTRAL.

18  
19 **36 Participants**

20  
21 37 Studies were selected if they focused on the effects of exposure MVC during pregnancy vs. non-  
22  
23 38 exposure, with follow up to verify outcomes in various settings, including secondary care, collision  
24  
25 39 and emergency, and inpatient care.

26  
27 **40 Data synthesis**

28  
29 41 For incidence data, we calculated a pooled estimate per 1,000 women. For comparison of outcomes  
30  
31 42 between women involved and those not involved in MVC, we calculated odds ratios with 95%  
32  
33 43 confidence intervals. Where possible, we statistically pooled the data using the random-effects model.  
34  
35 44 The quality of studies used in the comparative analysis was assessed with Newcastle-Ottawa Scale.

36  
37 **45 Results**

38  
39 46 We included 19 studies (3,222,066 women) of which the majority was carried out in high-income  
40  
41 47 countries (18/19). In population-level studies of women involved in MVC, maternal death occurred in  
42  
43 48 3.6 per 1,000 (95% CI 0.25 to 10.42; 3 studies, 12,000 women; Tau= 1.77), and fetal death or  
44  
45 49 stillbirth in 6.6 per 1,000 (95% CI 3.81 to 10.12; 8 studies, 47,992 women; I<sup>2</sup>=92.6%). Pooled  
46  
47 50 incidence of complications per 1,000 women involved in MVC was labour induction (276.43),  
48  
49 51 preterm delivery (191.90) and caesarean section (166.65). Compared to women not involved in MVC,  
50  
51 52 those involved had increased odds of placental abruption (OR 1.43, 95% CI 1.27 to 1.63; 3 studies,  
52  
53 53 1,500,825 women) and maternal death (OR 202.27; 95% CI 110.60 to 369.95; 1 study, 1,094,559  
54  
55 54 women).

1  
2  
3 55 **Conclusion:** Pregnant women involved in MVC were at higher risk of maternal death and  
4  
5 56 complications than those not involved.

6  
7 57 **PROSPERO registration:** CRD42018100788

8  
9 58 **Key terms:** Pregnancy; motor vehicle crashes; pregnancy complications

10  
11 59 **Word count:** 300

### 12 13 14 60 **Strengths and limitations of this study**

- 15  
16 61 • This is the first systematic review examining the link between involvement in MVC,  
17  
18 62 mortality and adverse outcomes that includes evaluation of study quality assessment.
- 19  
20 63 • This is the second systematic review looking at outcomes following MVC in pregnancy.
- 21  
22 64 • We conducted our review using a prospectively registered protocol and reported it in  
23  
24 65 accordance with the international standards.
- 25  
26 66 • Outcomes variables correspond to any trimester, not to specific trimesters.
- 27  
28 67 • Outcomes according to seatbelt use are scarce, since only two studies use population-level  
29  
30 68 data.

### 31 32 33 69 **Funding statement**

34  
35 70 This research received no specific grant from any funding agency in the public, commercial  
36  
37  
38 71 or not-for-profit sectors.

### 39 40 72 **Competing interest's statement**

41  
42 73 There are non-financial associations that may be relevant to the submitted manuscript.  
43  
44  
45 74



## 75 **Introduction**

76  
77 Up to half of all women in developed countries drive motor vehicles (1) and the consequences of road  
78 traffic-related injuries involving pregnant women can be severe (2). Indeed, motor vehicle crashes  
79 (MVC) are the most common cause of non-obstetric trauma associated with fetal deaths (2.3 per  
80 100,000 live births) (3). The risk of adverse outcomes resulting from an MVC increases in the second  
81 trimester of pregnancy if the pregnant women were the driver (4); however, this does not appear to be  
82 the case for pregnant passengers or pedestrians (5). A maternal mortality rate of 3.5 women per  
83 100,000 is reported following MVCs in pregnant women (6). Mechanisms of injury recorded within  
84 the pregnant population of the UK national trauma registry, the Trauma Audit and Research Network  
85 (TARN), saw an increased rate of vehicular collision in pregnant women when compared to the non-  
86 pregnant cohort (7). In 2001-2008, 2.9% of pregnant women in North Carolina were drivers in one or  
87 more crashes (8). In the USA, data from the National Automotive Sampling System (NASS/CDS)  
88 reflects that when vehicles with pregnant women are involved in collision, 50% of those women will  
89 sustain an injury(9). There are few safety guidelines on travelling by car during pregnancy (10-12).  
90 The focus of these tends to be on questions around the use of seatbelts and the activation of airbags in  
91 the car (12).

92  
93 There is a reported association between MVC and maternal mortality (13). Moreover, further  
94 associations such as the trigger for immediate delivery or being more likely to die are reported with  
95 severe blunt injury (Injury Severity Score (ISS) of 9 or above, or systolic blood pressure (SBP)  
96 <90mmHg on arrival) (14). Involvement in MVC is also associated with perinatal mortality (15),  
97 injuries to the abdominal region (16), placental abruption secondary to increased intra-abdominal  
98 pressure (17), preterm birth, and caesarean section (6). However, more data are required in relation to  
99 areas such as fetal outcomes and higher risk pregnancies, particularly regarding sociodemographic  
100 characteristics of the mother, specific trimester of pregnancy when exposed to trauma, socioeconomic  
101 country conditions, severity and type of trauma, and collision characteristics such as speed. A  
102 systematic review on trauma in pregnancy (including five studies reporting complications of

1  
2  
3 103 involvement in MVC, and fourteen other studies on others form of trauma) showed that MVC and  
4  
5 104 domestic violence were the most common causes of traumatic injury during pregnancy (4). No quality  
6  
7 105 assessment of the included studies was reported in this review. Previous non-systematic reviews have  
8  
9 106 published strategies used to monitor women and fetuses after a crash (18-21). However, to our  
10  
11 107 knowledge there is no systematic review or meta-analysis focused on the maternal and fetal outcomes  
12  
13  
14 108 after MVC in pregnancy.

15 109

### 18 110 *Review objectives*

20 111 As the clinical impact on the mother and fetus after MVC has not been well documented, we  
21  
22 112 conducted a systematic review of the effect on maternal and fetal outcomes of MVC in pregnant  
23  
24 113 women, compared to those not involved in a collision.

26 114

### 28 115 **Methods**

30 116 We conducted a systematic review and reported it according to recommended standards (22). The  
31  
32 117 review was prospectively registered with PROSPERO (no. CRD42018100788).

34 118

### 36 119 *Literature search*

38 120 Searching was from June to August 2018. The following databases were used to identify relevant  
39  
40 121 literature: Medline, Embase, Web of Science, Scopus, LILACS (Latin-American and Caribbean  
41  
42 122 System on Health Sciences Information), Science Citation Index, SciELO (Scientific Electronic  
43  
44 123 Library Online), TRANSPORT, IRRD (International Road Research Documentation), TRANSDOC  
45  
46 124 (European Conference of Ministers of Transportation databases), Cochrane Database of Systematic  
47  
48 125 Reviews (CDSR), and Cochrane Central Register of Controlled Trials (CENTRAL). We also sought  
49  
50 126 to identify unpublished research or research reported in the grey literature by searching a range of  
51  
52 127 relevant databases, including the Inside Conferences, Systems for Information on Grey Literature  
53  
54 128 (SIGLE) and Dissertation Abstracts. Furthermore, the searches of the medical database were  
55  
56 129 supplemented with the Internet search using a general search engine (e.g. Google,  
57  
58 130 [www.google.co.uk/](http://www.google.co.uk/)) and safetylit.org. Language and date restrictions were not applied to electronic

1  
2  
3 131 searches. Relevant studies were identified using a combination of, but not limited to, the medical  
4  
5 132 subject headings (MeSH) and keywords for “motor vehicle collision” (OR road traffic collision OR  
6  
7 133 crash OR collision) and “pregnancy” (OR pregnant women OR gravid women OR childbearing  
8  
9 134 women OR maternal).

10 135

11  
12  
13  
14 136 *Review inclusion criteria*

15  
16 137 Papers were selected if they studied the effects of exposure to trauma due to involvement in an MVC  
17  
18 138 during pregnancy vs. non-exposure, with follow up to verify outcomes in various settings including  
19  
20 139 secondary care, collision and emergency, and inpatient care. Observational studies (cohort studies,  
21  
22 140 case-control design, non-intervention arms of randomised controlled trials) were included. Case series  
23  
24 141 and case reports were excluded. Appendix 1 shows the search strategy for Medline (via Ovid) and  
25  
26 142 Appendix 2 the excluded studies with reasons.

27  
28  
29 14330  
31 144 *Data extraction and study quality assessment*

32  
33 145 A double screening of papers was carried out. Two reviewers (CAP & JR) independently extracted  
34  
35 146 the relevant data from each full-text article and data were recorded using a standardized data  
36  
37 147 extraction form. A data extraction form was piloted for each study design and amended as required.  
38  
39 148 Discrepancies were resolved by consensus or by a discussion with a third senior author (ER). We  
40  
41 149 extracted data on a) severe adverse maternal outcomes such as maternal death, miscarriage and  
42  
43 150 preterm birth (<37/40 and <34/40); b) severe adverse fetal outcomes such as intrauterine  
44  
45 151 death/stillbirth and neonatal death. Secondary outcomes were: a) individual components of maternal  
46  
47 152 outcomes such as preterm labour, mode of delivery (vaginal delivery vs caesarean section), premature  
48  
49 153 rupture of membranes (PROM), preterm premature rupture of membranes (PPROM), placental  
50  
51 154 abruption, chorioamnionitis/sepsis and maternal admission to an intensive care unit (ICU) or high  
52  
53 155 dependency unit (HDU); b) individual components of fetal outcomes: respiratory distress syndrome,  
54  
55  
56 156 neonatal ICU admission, low birth weight (LBW) and small for gestational age (SGA).

57  
58 157  
59  
60

1  
2  
3 158 We also extracted data on 1) adverse outcomes in pregnant women involved in MVC and their  
4  
5 159 offspring in subgroups according to maternal characteristics (low, high and any risk), trimester of  
6  
7 160 exposure, country (low and middle income, high income), type of trauma (penetrating, blunt, burns),  
8  
9 161 severity of trauma (mild, moderate, severe), seatbelt use (yes, no), study quality (low, high); 2) risk  
10  
11 162 factors for pregnancy complications following MVC such as maternal characteristics (age, parity,  
12  
13 163 high risk pregnancy, gestational age), type of trauma, type of motor vehicle, type of collision,  
14  
15 164 collision characteristic (stationary, high or moderate speed) and seat belt use.  
16  
17  
18 165

19  
20 166 The quality assessment of studies was independently evaluated by two reviewers (JR and CAP) using  
21  
22 167 the Newcastle-Ottawa Scale (23). This scale includes 8 items, 4 items about selection criteria of cases  
23  
24 168 or cohorts in case-control or cohort designs, respectively; 2 items about comparability between groups  
25  
26 169 (in both designs); and 3 items about exposure criteria in case-control designs and about outcomes in  
27  
28 170 cohort designs. Any of those studies could be awarded a maximum of one star for each numbered  
29  
30 171 item within the selection and exposure categories. A maximum of two stars could be given for  
31  
32 172 comparability. For the incidence analysis, we considered six aspects (24): 1) representativeness of  
33  
34 173 cohort; 2) design; 3) method of sampling; 4) adequacy of follow-up; 5) if the outcomes were  
35  
36 174 adequately ascertained and 4) if measurement or misclassification bias were minimized. Studies  
37  
38 175 without these features or with unclear reporting were classified to have a high risk of bias.  
39  
40

#### 41 176 *Patient and Public Involvement*

42  
43 177 "No patient involved"

#### 44 178 *Data synthesis*

45  
46  
47 179 We undertook random-effects meta-analysis to determine the odds ratios (OR) with 95% confidence  
48  
49 180 intervals (CI) for maternal and offspring complications from MVC. We estimated heterogeneity  
50  
51 181 between the included studies with Chi-Square test of Q (I<sup>2</sup>) excepting when not enough studies were  
52  
53 182 in the meta-analysis (2-3), and we pooled the rates of maternal/fetal complications and reported with  
54  
55 183 95% CI. For each primary outcome, a meta-analysis was conducted for studies sufficiently  
56  
57 184 homogeneous in terms of the characteristics of participants and exposure. The subgroup analysis was  
58  
59 185 applied in: a) trimester of pregnancy during which the trauma occurred; b) maternal risk status (low,

1  
2  
3 186 high, any risk); c) type of trauma; d) severity of trauma (using the ISS to categorize the severity of  
4  
5 187 trauma sustained following MVC) (25); e) setting (low and middle income, high-income country); f)  
6  
7 188 year of study publication: (before or after the introduction of mandatory seatbelt legislature in the  
8  
9 189 country of study); and g) study quality according to the Newcastle and Ottawa Scale (23).

10  
11  
12 190

## 13 14 191 **Results**

### 15 16 192 *Study selection*

17  
18 193 Out of 1,739 retrieved references, 19 studies met the eligibility criteria (Figure 1). Five of these  
19  
20 194 reported data allowing us to compare pregnancy complications between pregnant women involved in  
21  
22 195 MVC and those not involved in MVC (6, 26-29). The totality of the studies (n = 19) contributed to the  
23  
24 196 analysis of the incidence of pregnancy complications among women involved in MVC (6, 17, 26-42).

25  
26 197

### 27 28 198 *Characteristics of included studies*

29  
30 199 The characteristics of included studies are in Table 1. Included studies were published between 1993  
31  
32 200 and 2016. Most of them were carried out in developed, high-income countries such as USA (14/18)  
33  
34 201 (26, 28-31, 33-41), Sweden (1/19) (27), Kuwait (1/19) (17) and Israel (1/19) (42). The number of  
35  
36 202 included pregnant women varies, ranging from 39 to 1,094,559. The data was sourced from hospital  
37  
38 203 records/trauma registries (7/19) (17, 31, 32, 35, 38, 39, 42) or from population-level databases (12/19)  
39  
40 204 (6, 26-30, 33, 34, 36, 37, 40, 41). The majority of studies collected information on outcomes of  
41  
42 205 pregnant women involved in MVC during any trimester of pregnancy. 8 out of 19 studies reported  
43  
44 206 information about the use of safety devices such as seatbelts and/or airbag (26, 29, 30, 33, 35, 37-39).  
45  
46 207 Also in eight studies, the authors assessed the severity of MVC injuries with five of these using a  
47  
48 208 validated tool (28, 31, 35, 38, 42) – most of them reporting ISS (28, 31, 35, 42) and one the Revised  
49  
50 209 Trauma Scale (38) .

51  
52 210

### 53 54 211 *Quality assessment*

55  
56 212 60% of studies had a low risk of bias with regards to the adequacy of representativeness and random  
57  
58 213 sample selection (12/19). None of the studies was prospective. The categories of follow up of more  
59  
60



1  
2  
3 214 than 80% of participants, outcome ascertainment and misclassification bias showed low risk (Figure  
4  
5 215 2). The five papers included for comparison of complication rates between pregnant women exposed  
6  
7 216 to MVC and those who were not exposed (assessed using the Newcastle-Ottawa Scale) showed  
8  
9 217 generally high quality, with four papers scoring 9/9 (6, 26, 28, 29). The remaining paper scored 8/9,  
10  
11 218 losing one point for the comparability as it did not control for any secondary factors (27).  
12  
13  
14 219

#### 16 220 *Incidence of complications among pregnant women involved in motor vehicle crashes*

17  
18 221 The assessment of adverse outcome incidence among women involved in MVC (using population-  
19  
20 222 level data) demonstrated incidence estimations of 276.43 per 1000 for induction of labour (95% CI  
21  
22 223 262.54 to 290.54), 191.90 per 1000 for preterm delivery (95% CI 45.98 to 405.74), and 166.65 per  
23  
24 224 1000 for caesarean section (95% CI 47.34 to 339.00). The estimated incidence rates for other  
25  
26 225 complications included 42.33 per 1000 for PROM, 17.08 per 1000 requiring admission to hospital,  
27  
28 226 16.14 per 1000 for placental abruption and 15.19 per 1000 for neonatal respiratory distress. A pooled  
29  
30 227 incidence of maternal death was 3.60 per 1000 women (95% CI 0.25 to 10.42, 3 studies, 12,000  
31  
32 228 women, Tau=1.77). The pooled incidence of perinatal death (fetal death or stillbirth) per 1000 women  
33  
34 229 was 6.60, (95% CI 3.81 to 10.12; 8 studies, 47,992 women;  $I^2=92.6%$ ) (Table 2). The representation  
35  
36 230 of the maternal and offspring outcomes according to trauma severity are in appendices (Appendices 3  
37  
38 231 and 4). Using data from single hospital centres, the random pooled estimation for the incidence of  
39  
40 232 admission to hospital was 117.92 per 1000 women (95% CI 109.82 to 126.40) (17, 38); for maternal  
41  
42 233 death was 135.05 per 1000 women (95% CI 131.37 to 138.80) and for fetal death was 5.73 per 1000  
43  
44 234 women (95% CI 3.05 to 9.77) (Appendices 5 and 6).  
45  
46  
47 235

#### 49 236 *Pregnancy complications in women involved vs not involved in motor vehicle crashes*

50  
51 237 We observed a statistically significant link between involvement in MVC and maternal death (OR  
52  
53 238 202.3, 95% CI 110.60 to 370.00; single study) (27) (data not shown in table or graphic). Figure 3  
54  
55 239 shows pooled results from population-level data, demonstrating a positive association between MVC  
56  
57 240 and placental abruption (OR 1.43 95% CI 1.27 to 1.63). Two studies contributed data used in  
58  
59 241 sensitivity analyses stratifying by seatbelt use, where the pooled estimation (26, 29) of fetal death

1  
2  
3 242 decreased with seatbelt devices, but the association was not statistically significant (OR 0.66 95% CI  
4 0.36 to 1.19) (Figure 1, supplementary). The review manager forest plot displays a positive but not  
5 243 statistically significant association between fetal death and MVC without seatbelt use (OR 5.78 95%  
6 244 CI 0.17 to 201.12,  $Tau^2 = 6.51$ ) (Figure 2, supplementary).  
7 245  
8 246

## 13 247 **Discussion**

### 15 248 *Statement of principal findings*

17 249 This review estimated that for women involved in MVC, maternal death occurrence was 3.6 per 1000  
18 250 and perinatal death 6.6 per 1000 women. Compared to women not involved in MVC, those involved  
19 251 had an increased odds of placental abruption, antepartum haemorrhage and maternal death. The  
20 252 pooled incidence of complications per 1,000 women involved in MVC was, from the higher incidence  
21 253 to the lower, induction of labour, preterm delivery, caesarean section, premature rupture of  
22 254 membrane, and placental abruption (population level-data).  
23 255

### 24 256 *Strengths and weaknesses of this study*

25 257 This is the second systematic review, after the one of Mendez Figueroa et al., in 2013 (4), looking at  
26 258 outcomes following MVC in pregnancy. We conducted our review using a prospectively registered  
27 259 protocol (PROSPERO) and reported it in accordance with the international standards (43). This  
28 260 review, to our best knowledge, is the first one examining the link between involvement in MVC,  
29 261 mortality and adverse outcomes that involves evaluation of study quality assessment; 14 studies  
30 262 looking at outcome incidence related to MVC (17, 30-42) and 5 studies comparing outcomes in  
31 263 pregnant women involved in MVC and those who were not (6, 26-29). We used established tools to  
32 264 assess outcome reporting quality for the incidence rates (44) and comparability (45). We included data  
33 265 from population-level and single centre studies, but the analysis and reporting of the results were  
34 266 independent in order to get precision and validity in the estimations. However, a couple of graphics of  
35 267 the maternal and offspring's outcomes incidences have been included as Appendix 3 and 4. Between  
36 268 August 2018 and March 2020, there have been no new studies eligible to include in the systematic  
37 269 review.

1  
2  
3 270  
4  
5 271  
6  
7 272  
8  
9 273  
10  
11 274  
12  
13 275  
14  
15 276  
16  
17 277  
18  
19  
20 278  
21  
22 279  
23  
24 280  
25  
26 281  
27  
28 282  
29  
30 283  
31  
32 284  
33  
34 285  
35  
36 286  
37  
38 287  
39  
40 288  
41  
42 289  
43  
44 290  
45  
46 291  
47  
48 292  
49  
50 293  
51  
52 294  
53  
54 295  
55  
56 296  
57  
58 297  
59  
60

For the incidence analysis, we evaluated the quality of the 19 studies of this systematic review. The highest risk was in the design. None of the studies had a prospective design. The representativeness of cohort and the random method of sampling were other limitations of the quality of studies, with 7 out of 19 studies having a high risk of bias in these areas (17, 31, 32, 35, 38, 39, 42). However, the quality assessment of the five papers included for comparison of complication rates between pregnant women involved and not involved in MVC using the Newcastle-Ottawa Scale showed generally high quality, with four papers scoring 9/9 (6, 26, 28, 29).

The weaknesses of this systematic review are as follows. Firstly, outcomes were not reported by trimester, with 13 out of 19 papers focused on MVC at any trimester. Secondly, outcomes, according to seatbelt use, are scarce as only two studies using population-level data looked at safety features as a stratification factor (26, 29). Two studies with data sourced from hospital records/single-site trauma registries (38, 39) and three studies utilising population-level databases (26, 29, 30) reported some outcomes regarding seatbelt-use. Thirdly, we found a limited number of relevant studies comparing outcomes between women involved and not involved in MVC. The majority of the studies were carried out in the USA (26, 28, 29) with most recent one published in 2013 (29). Fourthly, the included studies differed in study design with seven of them using hospital records/single-site trauma registry (17, 31, 32, 35, 38, 39, 42) and twelve population database (6, 26-30, 33, 34, 36, 37, 40, 41). Despite analysing the data within the respective study designs and incorporation of anticipated variation into the statistical model (random-effects) (46), we encountered substantial statistical heterogeneity in the pooled estimates that could not be formally explored due to a limited number of studies and poor reporting of important factors such as trauma severity. As a fifth point, these data apply to developed countries - only one of the papers included data from an underdeveloped country, perhaps influencing the outcomes that might otherwise be seen in the developed world. Finally, in only eight studies did authors assess severity of MVC injuries, with only five of these using a validated tool (28, 31, 35, 38, 42). This was a challenge when aiming to analyse results according to the severity of the crash.

298

### 299 *Meaning of the study*

300 The strongest association was found between placental abruption (6, 28, 29) and MVC. Maternal  
301 death was associated with involvement in MVC but this finding needs to be treated with caution as the  
302 data come from a single study (27). The outcomes in descending order of incidence estimate per 1000  
303 (population-level data) were the induction of labour, preterm delivery, caesarean section, premature  
304 rupture of membranes, and admission to hospital, placental abruption and maternal death. In the  
305 analyses stratified by use of seatbelt, we observed an association of fetal death with lack of seatbelt  
306 use by pregnant women involved in an MVC. However, this finding was not statistically significant  
307 and informed by a limited number of studies. Previous studies have shown that pregnant women  
308 wearing seatbelt during the MVC did not experience a significantly higher risk of adverse fetal  
309 outcomes than women who were not involved in MVC (47) Furthermore, airbags seem to be  
310 contributing to the protection of both pregnant drivers and their fetuses (48).

311 The results of this systematic review provide evidence informing primary prevention measures,  
312 recommendations and educational interventions for pregnant women in the context of MVC that  
313 should be incorporated into the primary care guidelines.

314

### 315 *Unanswered questions and future research*

316 The effects of MVC in pregnant women is a specific field that requires further research and an  
317 improved methodological approach to determine the risks of adverse maternal and fetal outcomes.

318 Additional variables such as trauma severity, the position of the women in the car, use of seatbelt,  
319 deployment or non-deployment of an airbag, severity of the crash and gestational week of pregnancy  
320 should be recorded in relation to MVC exposure in order to allow more precision when analysing  
321 outcomes. A greater number of well-designed studies in a variety of global settings would strengthen  
322 current evidence-base.

323

### 324 *Conclusions*

1  
2  
3 325 Pregnant women involved in MVC seem to be at increased risk of maternal death and complications,  
4  
5 326 especially placental abruption, than those not involved in MVC. The risk of complications such as  
6  
7 327 preterm delivery, premature rupture of membranes and caesarean section were also increased.  
8  
9 328 However, these findings need to be treated with caution due to considerable between study  
10  
11 329 differences. Road traffic authorities should be conscious and strict in targeting preventive measures  
12  
13 330 aimed at pregnant users of motor vehicles due to risk associated with potential involvement in MVC.  
14  
15

16 331

17 332 **Word count:** 3,137

18 333

19 334 **Author's contribution**

20  
21  
22 335 PM conducted literature searches and screened publications jointly with JR. CAP and JR extracted the  
23  
24 336 data. CAP and ER drafted the manuscript and conducted the statistical analyses. KSK and ST  
25  
26 337 designed the study review. CAP is the guarantor. Authors VMR, KB, ABC, ST and KSK gave critical  
27  
28 338 revision of the manuscript. All authors had full access to the data and take responsibility for the data  
29  
30 339 analyses.

31 340 The corresponding author attests that all listed authors meet authorship criteria.  
32  
33 341

34 342 **Acknowledgement**

35  
36 343 Professor Khalid S. Khan is distinguished investigator at the University of Granada through a Beatriz  
37  
38 344 Galindo (Senior Modality) Program grant of the Spanish Ministry of Science, Innovation and  
39  
40 345 Universities.  
41  
42

43 346

44 347 **Data sharing Statement**

45  
46 348 Data have been extracted for original papers. Dataset generated has been used for the meta-analyses.  
47  
48 349  
49  
50  
51  
52  
53  
54  
55  
56  
57  
58  
59  
60

Table 1. Characteristics of included studies

| Study ID<br>Author, year,<br>Country         | Design                                                                            | Sample<br>size                        | Time<br>period | Inclusion criteria                                                             | Data source                                                                    | Trimester       | Seatbelt<br>use<br>(with data) | Assessment<br>of trauma<br>severity<br>(with data) | Method of<br>assessing<br>trauma<br>severity  | Maternal<br>outcomes                                                              | Offspring<br>outcomes                                              |
|----------------------------------------------|-----------------------------------------------------------------------------------|---------------------------------------|----------------|--------------------------------------------------------------------------------|--------------------------------------------------------------------------------|-----------------|--------------------------------|----------------------------------------------------|-----------------------------------------------|-----------------------------------------------------------------------------------|--------------------------------------------------------------------|
| <b>Population-level data</b>                 |                                                                                   |                                       |                |                                                                                |                                                                                |                 |                                |                                                    |                                               |                                                                                   |                                                                    |
| <b>Azar, 2005</b><br>USA                     | population-based<br>matched<br>retrospective<br>cohort<br><i>(incidence only)</i> | 5936                                  | 2003-<br>2011  | Admitted to<br>hospital<br>following MVC<br>while pregnant                     | Population-based<br>cohort                                                     | any             | no                             | no                                                 | N/A                                           | Maternal death                                                                    | -----                                                              |
| <b>Hyde, 2003</b><br>USA                     | retrospective<br>cohort<br><i>(incidence and<br/>comparison)</i>                  | 322704                                | 1992-<br>1999  | Pregnant<br>drivers involved<br>in MVC                                         | Linked databases<br>(police registry &<br>birth/death<br>certificates)         | any             | yes                            | yes                                                | Study-<br>specific<br>definition <sup>1</sup> | -----                                                                             | Fetal death                                                        |
| <b>Kvarnstrand,<br/>2008</b><br>Sweden       | retrospective<br>cohort <i>(incidence<br/>and comparison)</i>                     | 1094559                               | 1991-<br>2001  | Maternal<br>inclusion on<br>the accident<br>register > 28 GW                   | Linked databases<br>(police registry &<br>birth/death<br>certificates)         | 2 <sup>nd</sup> | no                             | yes                                                | Study<br>specific<br>definition <sup>2</sup>  | Maternal death                                                                    | Fetal/neonatal<br>death                                            |
| <b>Kuo, 2007</b><br>USA                      | retrospective<br>chart/database<br>review <i>(incidence<br/>only)</i>             | 16982<br>injuries<br>4479 (in<br>MVC) | 2002           | Pregnant women<br>hospitalized with<br>injury (only MVC<br>used)               | Sample from<br>population level<br>cohort (National<br>Inpatient Sample)       | any             | no                             | no                                                 | N/A                                           | Delivery,<br>hospitalization                                                      | -----                                                              |
| <b>Schiff, 2005</b><br>USA                   | retrospective<br>cohort<br><i>(incidence and<br/>comparison)</i>                  | 17899                                 | 1989-<br>2001  | Hospitalized for<br>MVC and with<br>a singleton<br>livebirth or<br>fetal death | Linked databases<br>(hospital discharge<br>data & birth/death<br>certificates) | any             | no                             | yes                                                | ISS                                           | Preterm birth,<br>PROM,<br>C-section,<br>placental<br>abruption                   | Stillbirth<br>LBW, SGA,<br>Fetal distress,<br>RDS,<br>Meconium     |
| <b>Schiff, 2010</b><br>USA                   | retrospective<br>cohort <i>(incidence<br/>only)</i>                               | 3348                                  | 2002-<br>2005  | Nonrollover<br>MVC among<br>pregnant<br>front seat<br>occupants                | Linked databases<br>(hospital discharge<br>data & birth/death<br>certificates) | any             | yes (airbag)<br>no (seatbelt)  | no                                                 | N/A                                           | Preterm birth,<br>placental<br>abruption, labour<br>induction, C-<br>section      | Stillbirth,<br>LBW<br>SGA, RDS<br>Fetal distress<br>Meconium       |
| <b>Vivian-<br/>Taylor, 2012</b><br>Australia | retrospective<br>cohort<br><i>(incidence and<br/>comparison)</i>                  | 604380                                | 2000-<br>2007  | Women who gave<br>birth exposed and<br>not exposed to<br>MVC                   | Linked databases<br>(hospital discharge<br>data & birth/death<br>certificates) | 2 <sup>nd</sup> | no                             | yes                                                | Study-<br>specific<br>definition <sup>3</sup> | Admission,<br>placental<br>abruption,<br>APH,PPH,<br>preterm birth, C-<br>section | Perinatal death<br>(>20 <sup>th</sup> GW),<br>neonatal<br>transfer |

|                                                |                                                                                  |        |           |                                                                                   |                                                                       |                                   |                                |     |             |                                               |                                |
|------------------------------------------------|----------------------------------------------------------------------------------|--------|-----------|-----------------------------------------------------------------------------------|-----------------------------------------------------------------------|-----------------------------------|--------------------------------|-----|-------------|-----------------------------------------------|--------------------------------|
| <b>Vladutiu, 2013</b><br>USA                   | retrospective cohort<br>( <i>incidence and comparison</i> )                      | 878546 | 2001-2008 | Pregnant women 16-46 years, > 20GW, delivering a live/stillbirth singleton infant | Linked databases (police registry & birth/death certificates)         | 2 <sup>nd</sup>                   | yes (seatbelt)<br>yes (airbag) | no  | N/A         | Placental abruption, PROM, preterm birth      | Stillbirth                     |
| <b>Weiss, 2002</b><br>USA                      | crash database pregnant vs. non-pregnant (NASS/CDS)<br>( <i>incidence only</i> ) | 32810  | 1995-1999 | Pregnant and non-pregnant women 15-39 years                                       | Sample from population-level database of traffic accidents            | any                               | yes                            | no  | N/A         | Maternal death                                | -----                          |
| <b>Weiss, 2008</b><br>USA                      | retrospective cohort<br>( <i>incidence only</i> )                                | 1816   | 1999-2002 | Injury-related emergency department visits by pregnant women (only MVC used)      | Linked databases (hospital discharge data & birth/death certificates) | any                               | no                             | no  | N/A         | Hospital admission                            | -----                          |
| <b>Whitehead, 2013*</b><br>USA                 | PRAMS survey database<br>( <i>incidence only</i> )                               | 235329 | 2000-2005 | Survey of women who recently delivered a live-born infant                         | Population-based cohort (PRAMS)                                       | any                               | no                             | no  | N/A         | Preterm birth, UTI, PROM                      | -----                          |
| <b>Wolf, 1993</b><br>USA                       | population-based retrospective cohort<br>( <i>incidence only</i> )               | 2582   | 1980-1988 | Pregnant women drivers involved in MVC >20GW                                      | Linked databases (police registry & birth/death certificates)         | 2 <sup>nd</sup> & 3 <sup>rd</sup> | yes                            | no  | N/A         | Preterm birth, placental abruption, C-section | Stillbirth, LBW, RDS           |
| <b>Single hospital records/trauma registry</b> |                                                                                  |        |           |                                                                                   |                                                                       |                                   |                                |     |             |                                               |                                |
| <b>Aboutanos, 2007</b><br>USA                  | retrospective chart/database review<br>( <i>incidence only</i> )                 | 148    | 2001-2005 | Pregnant women presenting to ED following MVC                                     | Single hospital records from trauma centre                            | any                               | yes (only in miscarriage)      | yes | ISS         | Maternal death, miscarriage                   | Fetal death<br>hydrops fetalis |
| <b>Baerga-Varela, 2000</b><br>USA              | retrospective chart/database review<br>( <i>incidence only</i> )                 | 39     | 1986-1996 | Admitted to hospital after MVC while pregnant                                     | Single hospital records                                               | any                               | no                             | yes | ISS         | Maternal death, miscarriage                   | Stillbirth                     |
| <b>Brookfield, 2013</b><br>USA                 | retrospective chart/database review<br>( <i>incidence only</i> )                 | 256    | 1990-2007 | Pregnant women presenting to ED following MVC                                     | Single hospital records from trauma centre                            | any                               | yes                            | yes | ISS and RTS | Maternal death, admission to hospital         | -----                          |

|                                |                                                         |      |           |                                                                        |                                 |                                   |     |    |     |                                                                                           |                                                  |
|--------------------------------|---------------------------------------------------------|------|-----------|------------------------------------------------------------------------|---------------------------------|-----------------------------------|-----|----|-----|-------------------------------------------------------------------------------------------|--------------------------------------------------|
| <b>Chibber, 2015</b><br>Kuwait | retrospective chart/database review<br>(incidence only) | 728  | 2009-2012 | MVC, pregnant, treated at major tertiary hospitals                     | Single hospital records         | 2 <sup>nd</sup>                   | no  | no | N/A | Maternal death, placental abruption, preterm birth, uterine rupture, C-Section, admission | Fetal death, fetal distress                      |
| <b>Luley, 2013</b><br>USA      | retrospective chart/database review<br>(incidence only) | 126  | 1994-2010 | Pregnant women after an MVC >14/40 GA                                  | Single hospital trauma database | 2 <sup>nd</sup> & 3 <sup>rd</sup> | yes | no | N/A | Maternal death, placental abruption, C-section                                            | Stillbirth                                       |
| <b>Miller, 2016</b><br>Israel  | retrospective cohort<br>(incidence only)                | 3794 | 2006-2013 | Women 18-40 years, in MVC and hospitalized (only pregnant cohort used) | National trauma registry        | any                               | no  | no | ISS | Maternal death, miscarriage, placental abruption, C-section                               | Stillbirth                                       |
| <b>Orji, 2002</b><br>Nigeria   | retrospective chart/database review<br>(incidence only) | 84   | 1980-2000 | Pregnant women in MVC managed in tertiary hospitals                    | Single hospital records**       | any                               | no  | no | N/A | Maternal death, placental abruption, uterine rupture, C-section                           | Perinatal death (fetal death), fetal tachycardia |

ISS: Injury Severity Score; RTS: Revised Trauma Score; ICU: Intensive Care Unit, N/A not applicable; GA: Gestational Age; LBW: Low birth weight; SGA: Small for gestational age; RDS: Respiratory distress syndrome. \*National survey; \*\*Two hospitals in same region included; <sup>1</sup>Possible/probable/incapacitated/fatal; <sup>2</sup>Fatal/major/minor/uninjured; <sup>3</sup>'Severe' = admission to ICU and/or blood transfusion and/or injury to abdomen/pelvis/lower back.



Table 2. Incidence of adverse outcomes per 1,000 women involved in motor vehicle crashes.

| Outcome and study            | Number of studies | Number of women | Incidence estimate per 1,000 women | 95% CI                    |
|------------------------------|-------------------|-----------------|------------------------------------|---------------------------|
| <b>Maternal</b>              |                   |                 |                                    |                           |
| <b>Maternal death</b>        | <b>3</b>          | <b>12000</b>    | <b>3.60</b>                        | <b>(0.25 to 10.42)</b>    |
| Azar, 2005                   |                   |                 | 6.57                               | (4.68 to 8.97 )           |
| Kvarnstrand, 2008            |                   |                 | 6.61                               | (3.70 to 10.88)           |
| Miller, 2016                 |                   |                 | 0.26                               | (0.01 to 1.47)            |
| <b>Admission to hospital</b> | <b>2</b>          | <b>3838</b>     | <b>17.08</b>                       | <b>(13.20 to 21.46)</b>   |
| Vivian-Taylor, 2012          |                   |                 | 8.90                               | (5.28 to 14.03)           |
| Weiss, 2008                  |                   |                 | 29.19                              | (21.94 to 38.0)           |
| <b>Placenta abruption</b>    | <b>6</b>          | <b>36737</b>    | <b>16.14</b>                       | <b>(7.04 to 28.78)</b>    |
| Wolf, 1993                   |                   |                 | 8.10                               | (5.02 to 12.36)           |
| Miller, 2016                 |                   |                 | 1.05                               | (0.29 to 2.70)            |
| Schiff, 2005                 |                   |                 | 113.40                             | (88.80 to 142.01)         |
| Schiff, 2010                 |                   |                 | 12.25                              | (8.80 to 16.58)           |
| Vivian-Taylor, 2012          |                   |                 | 16.32                              | (11.26 to 22.84)          |
| Vladutiu, 2013               |                   |                 | 7.17                               | (6.15 to 8.31)            |
| <b>Preterm delivery</b>      | <b>5</b>          | <b>265680</b>   | <b>191.90</b>                      | <b>(45.98 to 405.74)</b>  |
| Schiff, 2005                 |                   |                 | 316.15                             | (278.53 to 355.65)        |
| Schiff, 2010                 |                   |                 | 97.37                              | (87.53 to 107.92)         |
| Vivian-Taylor, 2012          |                   |                 | 83.09                              | (71.42 to 95.98)          |
| Vladutiu, 2013               |                   |                 | 110.33                             | (106.43 to 114.33)        |
| Whitehead, 2013              |                   |                 | 437.00                             | (435.00 to 439.01)        |
| <b>PROM</b>                  | <b>3</b>          | <b>260310</b>   | <b>42.33</b>                       | <b>(5.87 to 109.24)</b>   |
| Schiff, 2005                 |                   |                 | 22.34                              | (11.95 to 37.89)          |
| Vladutiu, 2013               |                   |                 | 23.53                              | (21.66 to 25.51)          |
| Whitehead, 2013              |                   |                 | 96.00                              | (94.81 to 97.20)          |
| <b>Labour induction</b>      | <b>2</b>          | <b>3930</b>     | <b>276.43</b>                      | <b>(262.54 to 290.54)</b> |

|                             |                |              |               |                          |
|-----------------------------|----------------|--------------|---------------|--------------------------|
| Schiff, 2005                |                |              | 223.37        | (190.15 to 259.42)       |
| Schiff, 2010                |                |              | 286.14        | (270.87 to 301.78)       |
| <b>Caesarean section</b>    | <b>5</b>       | <b>12338</b> | <b>166.65</b> | <b>(47.34 to 339.00)</b> |
| Miller, 2016                |                |              | 6.06          | (3.85 to 9.08)           |
| Schiff, 2005                |                |              | 254.30        | (219.38 to 291.73)       |
| Schiff, 2010                |                |              | 259.26        | (244.48 to 274.46)       |
| Vivian-Taylor, 2012         |                |              | 260.14        | (241.13 to 279.85)       |
| Wolf, 1993                  |                |              | 171.68        | (157.35 to 186.76)       |
| <b>Offspring</b>            |                |              |               |                          |
| <b>Perinatal death</b>      | <b>8</b>       | <b>47992</b> | <b>6.60</b>   | <b>(3.81 to 10.12)</b>   |
| Kvarnstrand, 2008           | fetal/neonatal |              | 17.62         | (12.62 to 23.92)         |
| Hyde, 2003                  | fetal          |              | 5.01          | (3.66 to 6.70)           |
| Miller, 2016                | stillbirth     |              | 0.79          | (0.16 to 2.31)           |
| Schiff, 2005                | fetal          |              | 12.03         | (4.85 to 24.62)          |
| Vivian-Taylor, 2012         | stillbirth     |              | 16.82         | (11.67 to 23.42)         |
| Vladutiu, 2013              | stillbirth     |              | 5.25          | (4.38 to 6.23)           |
| Schiff, 2010                | fetal          |              | 4.18          | (2.29 to 7.01)           |
| Wolf, 1993                  | fetal          |              | 3.47          | (1.59 to 6.58)           |
| <b>Fetal distress</b>       | <b>2</b>       | <b>3930</b>  | <b>60.09</b>  | <b>(52.85 to 67.77)</b>  |
| Schiff, 2005                |                |              | 132.30        | (105.84 to 162.56)       |
| Schiff, 2010                |                |              | 50.48         | (43.31 to 58.44)         |
| <b>Meconium at delivery</b> | <b>2</b>       | <b>3930</b>  | <b>52.61</b>  | <b>(45.82 to 59.85)</b>  |
| Schiff, 2005                |                |              | 63.57         | (45.15 to 86.57)         |
| Schiff, 2010                |                |              | 51.08         | (43.86 to 59.08)         |
| <b>RDS</b>                  | <b>3</b>       | <b>6522</b>  | <b>15.19</b>  | <b>(5.83 to 28.68)</b>   |
| Schiff, 2005                |                |              | 32.65         | (19.77 to 50.51)         |
| Schiff, 2010                |                |              | 14.64         | (10.85 to 19.30)         |
| Wolf, 1993                  |                |              | 6.17          | (3.53 to 10.00)          |

*Data source: population database; CI, Confidence Interval; PROM: Premature Rupture of Membranes; RDS: Respiratory Distress Syndrome.*

**Figures**

Figure 1. The study selection process in the systematic review of outcomes on pregnant women involved in motor vehicle crashes

Figure 2. The quality assessment of the included studies

Figure 3. Comparison of outcomes between women involved and not involved in motor vehicle crashes

Figure 1. (Supplementary). Comparison of pregnancy complications between women involved and not involved in motor vehicle crashes stratified by seatbelt use

Figure 2. (Supplementary). Comparison of fetal death between women involved and not involved in motor vehicle crashes stratified by seatbelt use

## References

1. Sivak M. Female drivers in the United States, 1963-2010: from a minority to a majority? *Traffic Inj Prev*. 2013;14(3):259-60.
2. Azar T, Longo C, Oddy L, Abenhaim HA. Motor vehicle collision-related accidents in pregnancy. *Journal of Obstetrics and Gynaecology Research*. 2015;41(9):1370-6.
3. Weiss HB, Songer TJ, Fabio A. Fetal deaths related to maternal injury. *Jama-Journal of the American Medical Association*. 2001;286(15):1863-8.
4. Mendez-Figueroa H, Dahlke JD, Vrees RA, Rouse DJ. Trauma in pregnancy: an updated systematic review. *Am J Obstet Gynecol*. 2013;209(1):1-10.
5. Redelmeier DA, May SC, Thiruchelvam D, Barrett JF. Pregnancy and the Risk of a Traffic Crash. *Canadian Medical Association Journal*. 2014;186(10):pp 742-50.
6. Vivian-Taylor J, Roberts CL, Chen JS, Ford JB. Motor vehicle accidents during pregnancy: a population-based study. *Bjog-an International Journal of Obstetrics and Gynaecology*. 2012;119(4):499-503.
7. Battaloglu E, McDonnell D, Chu J, Lecky F, Porter K. Epidemiology and outcomes of pregnancy and obstetric complications in trauma in the United Kingdom. *Injury*. 2016;47(1):184-7.
8. Vladutiu CJ, Marshall SW, Poole C, Casteel C, Menard MK, Weiss HB. Adverse pregnancy outcomes following motor vehicle crashes. *Am J Prev Med*. 2013;45(5):629-36.
9. Manoogian S. Comparison of pregnant and non-pregnant occupant crash and injury characteristics based on national crash data. *Accident Analysis & Prevention*. 2015;74:pp 69-76.
10. Service NH. Car travel in pregnancy [Available from: <https://www.nhs.uk/conditions/pregnancy-and-baby/travel-pregnant/-car-travel-in-pregnancy>.
11. Trust NC. Safety Guidelines on travelling by car during pregnancy UK [Available from: <https://www.nct.org.uk>.
12. Gynecologist ACoOa. Car safety for pregnant women, babies and children. 2016.
13. Deshpande NA, Kucirka LM, Smith RN, Oxford CM. Pregnant trauma victims experience nearly 2-fold higher mortality compared to their nonpregnant counterparts. *American Journal of Obstetrics & Gynecology*. 2017;217(5):590.e1-.e9.
14. Schuster M, Becker N, Young A, Paglia MJ, Mackeen AD. Trauma in pregnancy: A review of the Pennsylvania Trauma Systems Foundation database. *Trauma (United Kingdom)*. 2018;20(1):30-7.
15. Gibbins KJ, Silver RM. Trauma/motor vehicle crashes and stillbirth. *American Journal of Obstetrics and Gynecology*. 2017;216 (1 Supplement 1):S552-S3.
16. Lien C, Ali A, Culhane J. Blunt abdominal trauma with uterine rupture and fetal demise. *Trauma (United Kingdom)*. 2017;19(3):219-21.
17. Chibber R, Al-Harmi J, Fouda M, El-Saleh E. Motor-vehicle injury in pregnancy and subsequent feto-maternal outcomes: Of grave concern. *Journal of Maternal-Fetal and Neonatal Medicine*. 2015;28(4):399-402.
18. Brown S, Mozurkewich E. Trauma during pregnancy. *Obstetrics and gynecology clinics of North America*. 2013;40(1):47-57.
19. Einav S, Sela HY, Weiniger CF. Management and outcomes of trauma during pregnancy. *Anesthesiology clinics*. 2013;31(1):141-56.
20. Mirza FG, Devine PC, Gaddipati S. Trauma in pregnancy: a systematic approach. *Am J Perinatol*. 2010;27(7):579-86.
21. Smith KA, Bryce S. Trauma in the pregnant patient: an evidence-based approach to management. *Emergency medicine practice*. 2013;15(4):1-18; quiz -9.
22. Moher D, Liberati A, Tetzlaff J, Altman DG. Preferred reporting items for systematic reviews and meta-analyses: the PRISMA statement. *Bmj*. 2009;339:b2535.
23. Lo CK-L, Mertz D, Loeb M. Newcastle-Ottawa Scale: comparing reviewers' to authors' assessments. *BMC Medical Research Methodology*. 2014;14(1):45.

24. Cheong-See F, Schuit E, Arroyo-Manzano D, Khalil A, Barrett J, Joseph KS, et al. Prospective risk of stillbirth and neonatal complications in twin pregnancies: systematic review and meta-analysis. *Bmj*. 2016;354:i4353.
25. Deng Q, Tang B, Xue C, Liu Y, Liu X, Lv Y, et al. Comparison of the Ability to Predict Mortality between the Injury Severity Score and the New Injury Severity Score: A Meta-Analysis. *Int J Environ Res Public Health*. 2016;13(8).
26. Hyde LK, Cook LJ, Olson LM, Weiss HB, Dean JM. Effect of motor vehicle crashes on adverse fetal outcomes. *Obstetrics & Gynecology*. 2003;102(2):279-86.
27. Kvarnstrand L, Milsom I, Lekander T, Druid H, Jacobsson B. Maternal Fatalities, Fetal and Neonatal Deaths Related to Motor Vehicle Crashes During Pregnancy: A National Population-Based Study. *Acta Obstetrica et Gynecologica Scandinavica*. 2008;87(9):9 p.
28. Schiff MA, Holt VL. Pregnancy outcomes following hospitalization for motor vehicle crashes in Washington State from 1989 to 2001.[Erratum appears in *Am J Epidemiol*. 2005 Jul 15;162(2):197]. *American Journal of Epidemiology*. 2005;161(6):503-10.
29. Vladutiu CJ, Marshall SW, Poole C, Casteel C, Menard MK, Weiss HB. Adverse Pregnancy Outcomes Following Motor Vehicle Crashes. *American Journal of Preventive Medicine*. 2013;45(5):629-36.
30. Wolf ME, Alexander BH, Rivara FP, Hickok DE, Maier RV, Starzyk PM. A retrospective cohort study of seat-belt use and pregnancy outcome after a motor-vehicle crash. *Journal of Trauma-Injury Infection and Critical Care*. 1993;34(1):116-9.
31. Baerga-Varela Y, Zietlow SP, Bannon MP, Harmsen WS, Ilstrup DM. Trauma in pregnancy. *Mayo Clinic Proceedings*. 2000;75(12):1243-8.
32. Orji EO, Fadiora SO, Ogunlola IO, Badru OS. Road traffic accidents in pregnancy in Southwest Nigeria: A 21-year review. *Journal of Obstetrics and Gynaecology*. 2002;22(5):516-8.
33. Weiss HB, Strotmeyer S, Group BMJP. Characteristics of pregnant women in motor vehicle crashes. *Injury Prevention*. 2002;8(3):p. 207-10.
34. Kuo C, Jamieson DJ, McPheeters ML, Meikle SF, Posner SF. Injury hospitalizations of pregnant women in the United States, 2002. *Am J Obstet Gynecol*. 2007;196(2):161.e1-6.
35. Aboutanos MB, Aboutanos SZ, Dompkowski D, Duane TM, Malhotra AK, Ivatury RR. Significance of motor vehicle crashes and pelvic injury on fetal mortality: A five-year institutional review. *Journal of Trauma - Injury, Infection and Critical Care*. 2008;65(3):616-20.
36. Weiss HB, Sauber-Schatz EK, Cook LJ. The epidemiology of pregnancy-associated emergency department injury visits and their impact on birth outcomes. *Accident Analysis & Prevention*. 2008;40(3):pp 1088-95.
37. Schiff MA, Mack CD, Kaufman RP, Holt VL, Grossman DC. The Effect of Air Bags on Pregnancy Outcomes in Washington State: 2002-2005. *Obstetrics and Gynecology*. 2010;115(1):pp 85-92.
38. Brookfield KF, Gonzalez-Quintero VH, Davis JS, Schulman CI. Maternal death in the emergency department from trauma. *Archives of Gynecology & Obstetrics*. 2013;288(3):507-12.
39. Luley T, Fitzpatrick CB, Grotegut CA, Hocker MB, Myers ER, Brown HL. Perinatal implications of motor vehicle accident trauma during pregnancy: Identifying populations at risk. *American Journal of Obstetrics and Gynecology*. 2013;208(6):466.e1-.e5.
40. Whitehead NS. Prenatal Counseling on Seat Belt Use and Crash-Related Medical Care. *Maternal and Child Health Journal*. 2013;17(9):pp 1527-32.
41. Azar T, Longo C, Oddy L, Abenhaim HA. Motor vehicle collision-related accidents in pregnancy. *Journal of Obstetrics and Gynaecology Research*. 2015;41(9):pp 1370-6.
42. Miller N, Biron-Shental T, Peleg K, Fishman A, Olsha O, Givon A, et al. Are pregnant women safer in motor vehicle accidents? *Journal of Perinatal Medicine*. 2016;44(3):329-32.
43. Liberati A, Altman DG, Tetzlaff J, Mulrow C, Gotzsche PC, Ioannidis JP, et al. The PRISMA statement for reporting systematic reviews and meta-analyses of studies that evaluate health care interventions: explanation and elaboration. *Annals of internal medicine*. 2009;151(4):W65-94.

- 1  
2  
3 44. Glasziou P, Irwig L, Bain C, Colditz G. Frequency and rate. In: Systematic reviews in health  
4 care: a practical guide, 2nd edn. Cambridge, UK: Cambridge University Press, 2001: 67–73.  
5  
6 45. Lo CK, Mertz D, Loeb M. Newcastle-Ottawa Scale: comparing reviewers' to authors'  
7 assessments. BMC Med Res Methodol. 2014;14:45.  
8 46. Colditz GA, Burdick E, Mosteller F. Heterogeneity in meta-analysis of data from  
9 epidemiologic studies: a commentary. Am J Epidemiol. 1995;142(4):371-82.  
10 47. Hyde LK, Cook LJ, Olson LM, Weiss HB, Dean JM. Effect of motor vehicle crashes on adverse  
11 fetal outcomes. Obstet Gynecol. 2003;102(2):279-86.  
12 48. Acar BS, Meric M. The effect of placenta location on the safety of pregnant driver and her  
13 fetus. International Journal of Crashworthiness. 2017;22(2):pp 163-8.  
14  
15  
16  
17  
18  
19  
20  
21  
22  
23  
24  
25  
26  
27  
28  
29  
30  
31  
32  
33  
34  
35  
36  
37  
38  
39  
40  
41  
42  
43  
44  
45  
46  
47  
48  
49  
50  
51  
52  
53  
54  
55  
56  
57  
58  
59  
60

For peer review only

1  
2  
3  
4  
5  
6  
7  
8  
9  
10  
11  
12  
13  
14  
15  
16  
17  
18  
19  
20  
21  
22  
23  
24  
25  
26  
27  
28  
29  
30  
31  
32  
33  
34  
35  
36  
37  
38  
39  
40  
41  
42  
43  
44  
45  
46  
47  
48  
49  
50  
51  
52  
53  
54  
55  
56  
57  
58  
59  
60

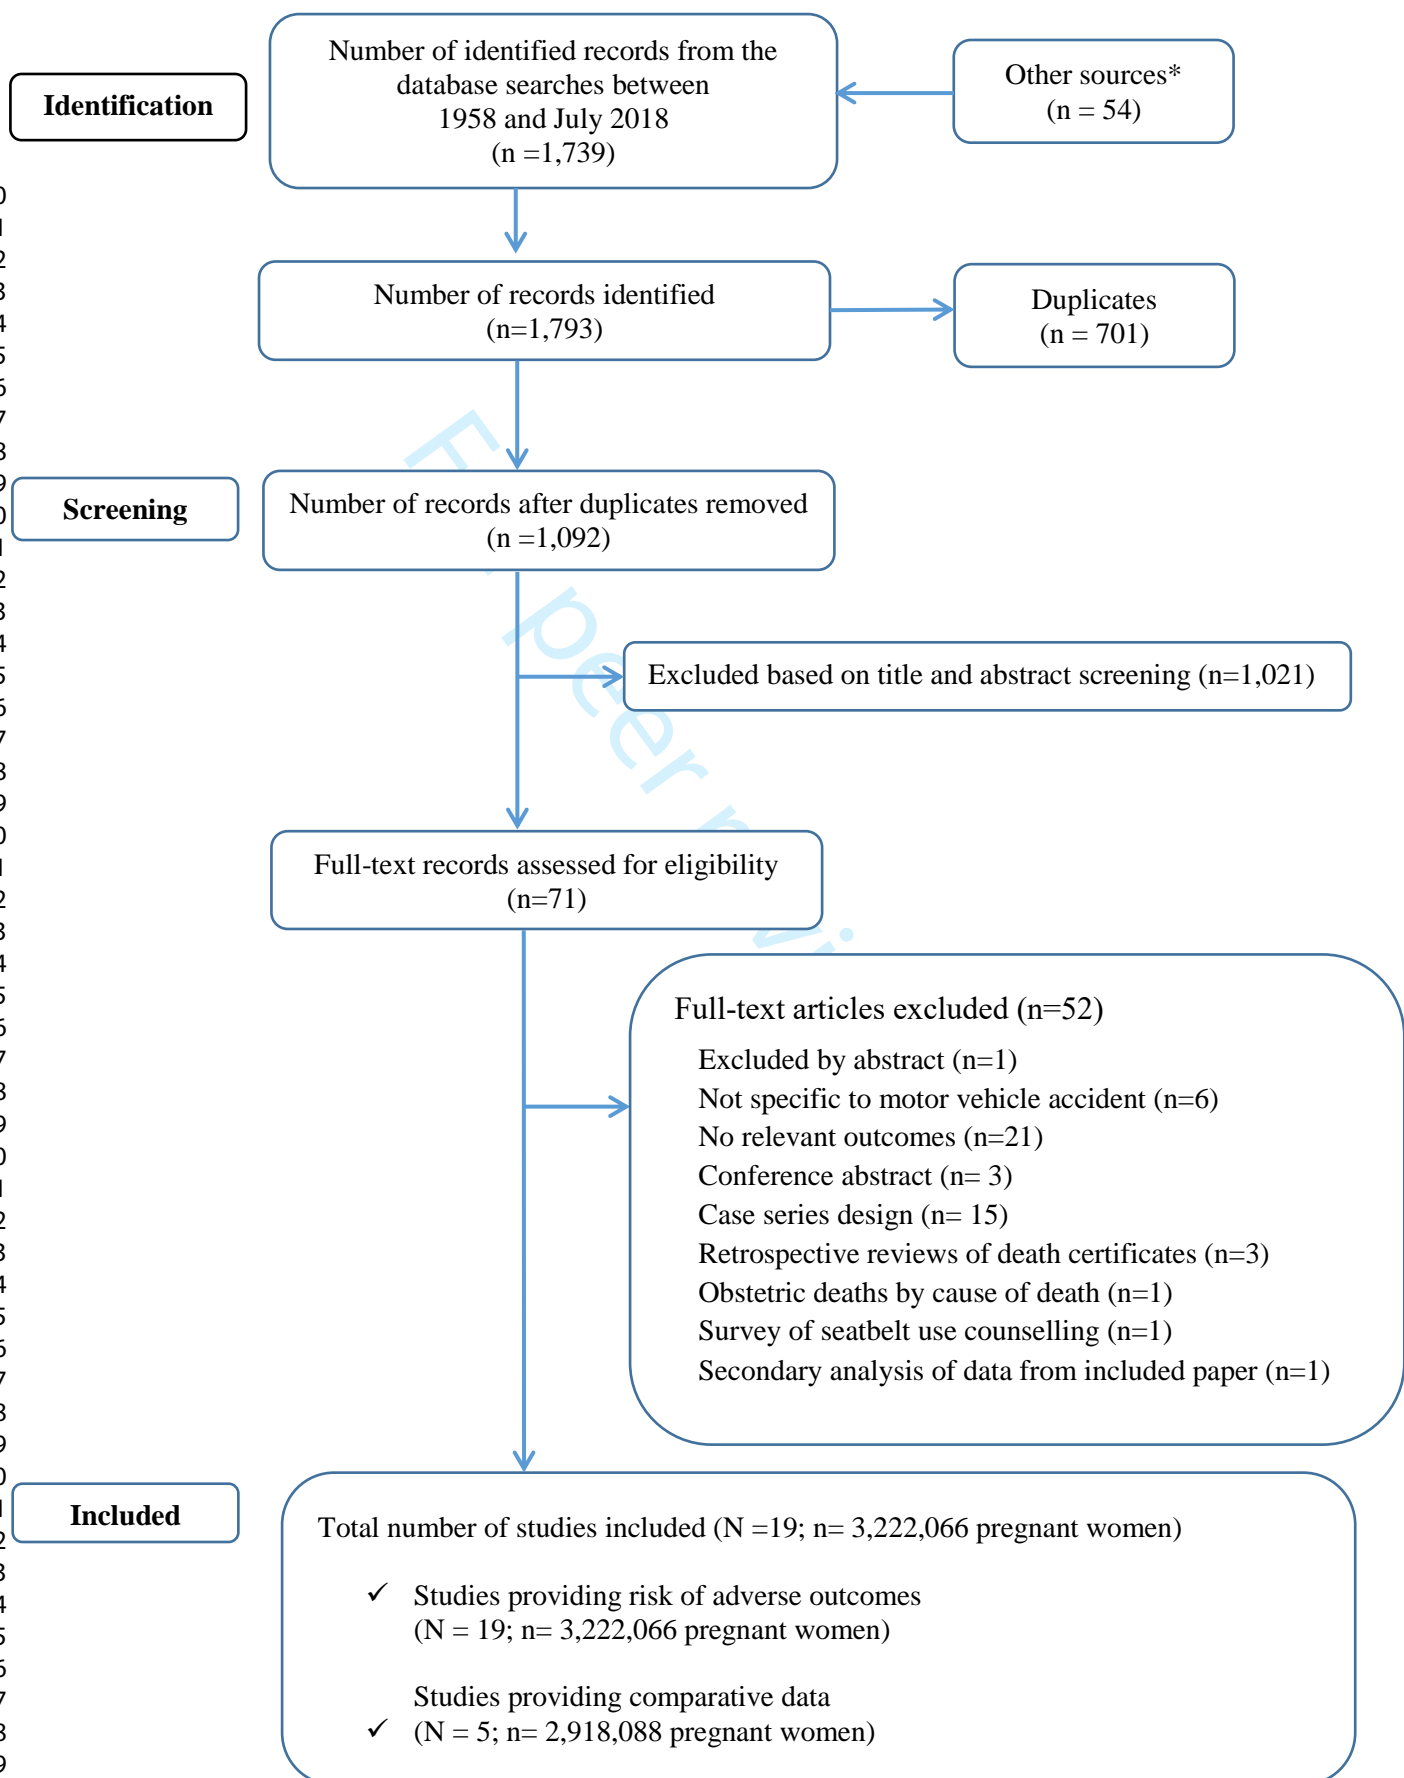

\*references of relevant non-systematic reviews and Google scholar

1  
2  
3  
4  
5  
6  
7  
8  
9  
10  
11  
12  
13  
14  
15  
16  
17  
18  
19  
20  
21  
22  
23  
24  
25  
26  
27  
28  
29  
30  
31  
32  
33  
34  
35  
36  
37  
38  
39  
40  
41  
42  
43  
44  
45  
46  
47  
48  
49  
50  
51  
52  
53  
54  
55  
56  
57  
58  
59  
60



review only



Outcome

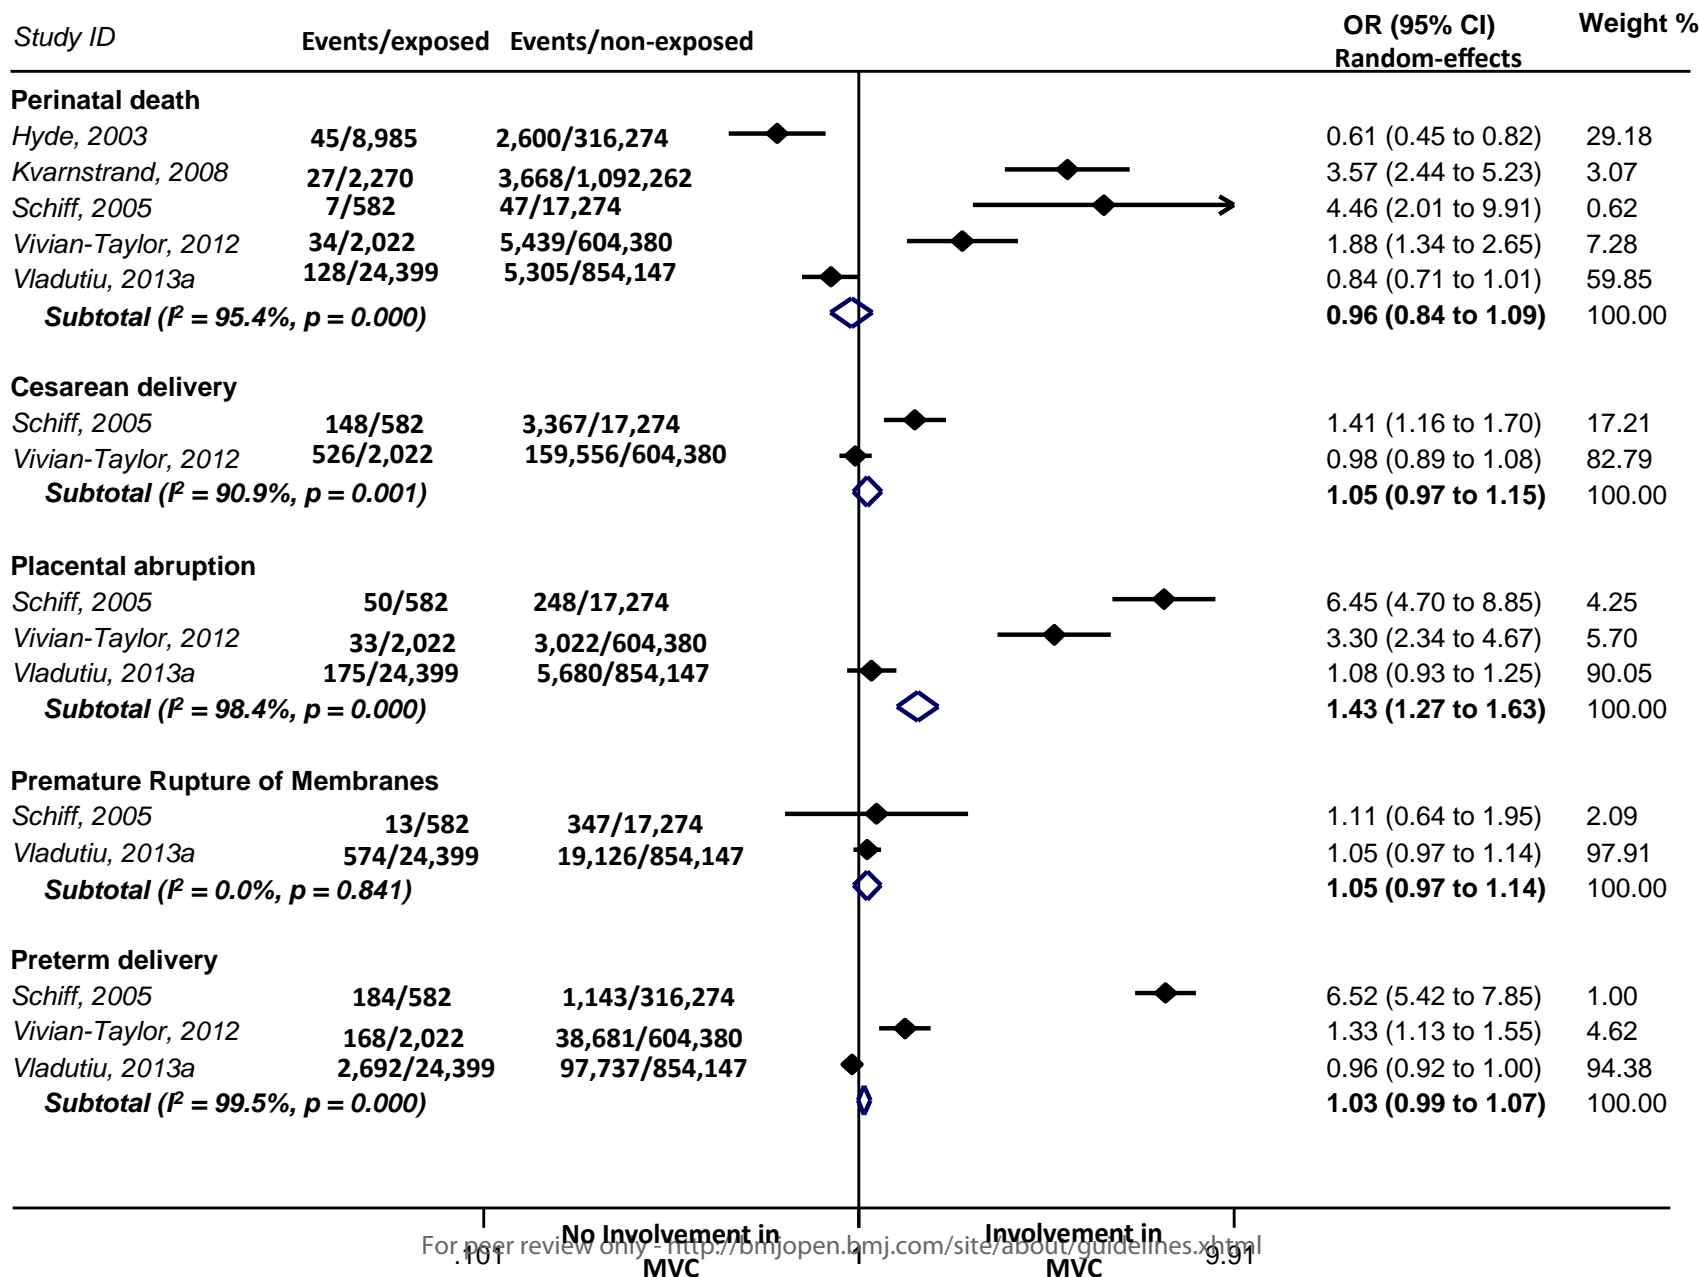

For peer review only - <http://bmjopen.bmj.com/site/about/guidelines.xhtml>

1  
2  
3  
4  
5  
6  
7  
8  
9  
10  
11  
12  
13  
14  
15  
16  
17  
18  
19  
20  
21  
22  
23  
24  
25  
26  
27  
28  
29  
30  
31  
32  
33  
34  
35  
36  
37  
38  
39  
40  
41



| Study ID (Subgroup)                  | MVC        |              | Non MVC     |                | Weight        | Odds Ratio M-H, Random, 95% CI |
|--------------------------------------|------------|--------------|-------------|----------------|---------------|--------------------------------|
|                                      | Events     | Total        | Events      | Total          |               |                                |
| <b>Fetal deaths (seatbelts used)</b> |            |              |             |                |               |                                |
| Hyde 2003                            | 28         | 7145         | 2600        | 313674         | 46.2%         | 0.47 (0.32 to 0.68)            |
| Madutiu 2013                         | 133        | 24531        | 5305        | 848073         | 53.8%         | 0.87 (0.73 to 1.03)            |
| <b>Subtotal (95% CI)</b>             |            | <b>31676</b> |             | <b>1161747</b> | <b>100.0%</b> | <b>0.65 (0.36 to 1.19)</b>     |
| <b>Total events</b>                  | <b>161</b> |              | <b>7905</b> |                |               |                                |

Heterogeneity: Tau<sup>2</sup> = 0.17; Chi<sup>2</sup> = 8.58, df = 1 (P = 0.003); I<sup>2</sup> = 88%  
 Test for overall effect: Z = 1.39 (P = 0.16)

|                                         |           |             |             |                |               |                              |
|-----------------------------------------|-----------|-------------|-------------|----------------|---------------|------------------------------|
| <b>Fetal death (seatbelts not used)</b> |           |             |             |                |               |                              |
| Hyde 2003                               | 12        | 1099        | 2600        | 313674         | 49.8%         | 1.32 (0.75 to 2.34)          |
| Madutiu 2013                            | 60        | 443         | 5305        | 848073         | 50.2%         | 24.89 (18.93 to 32.71)       |
| <b>Subtotal (95% CI)</b>                |           | <b>1542</b> |             | <b>1161747</b> | <b>100.0%</b> | <b>5.78 (0.17 to 201.12)</b> |
| <b>Total events</b>                     | <b>72</b> |             | <b>7905</b> |                |               |                              |

Heterogeneity: Tau<sup>2</sup> = 6.51; Chi<sup>2</sup> = 126.07, df = 1 (P < 0.00001); I<sup>2</sup> = 99%  
 Test for overall effect: Z = 0.97 (P = 0.33)  
 Test for subgroup differences: Chi<sup>2</sup> = 1.41, df = 1 (P = 0.24), I<sup>2</sup> = 28.9%



\*MVC, motor vehicle crash

## Appendix 1. Search strategy for MEDLINE (via Ovid) executed from database inception up to July 2018

| Item | Search term                                                                                                                                        |
|------|----------------------------------------------------------------------------------------------------------------------------------------------------|
| 1    | pregnancy.af.                                                                                                                                      |
| 2    | pregnan*.sh.                                                                                                                                       |
| 3    | gravidity.sh.                                                                                                                                      |
| 4    | gravid*.sh.                                                                                                                                        |
| 5    | gestation*.sh.                                                                                                                                     |
| 6    | pregnant women.sh.                                                                                                                                 |
| 7    | pregnant wom#n.sh.                                                                                                                                 |
| 8    | (child adj3 bearing).tw.                                                                                                                           |
| 9    | childbearing.af.                                                                                                                                   |
| 10   | matern*.sh.                                                                                                                                        |
| 11   | vehicle* crash*.af.                                                                                                                                |
| 12   | vehicle* accident*.af.                                                                                                                             |
| 13   | vehicle* collision*.af.                                                                                                                            |
| 14   | motor vehicle crash*.af.                                                                                                                           |
| 15   | motor vehicle accident*.af.                                                                                                                        |
| 16   | motor vehicle collision*.af.                                                                                                                       |
| 17   | motor vehicle injur*.af.                                                                                                                           |
| 18   | vehicle* injur*.af.                                                                                                                                |
| 19   | road traffic crash*.af.                                                                                                                            |
| 20   | road traffic accident*.af.                                                                                                                         |
| 21   | road traffic collision*.af.                                                                                                                        |
| 22   | road traffic injur*.af.                                                                                                                            |
| 23   | auto* crash*.af.                                                                                                                                   |
| 24   | auto* accident*.af.                                                                                                                                |
| 25   | auto* collision*.af.                                                                                                                               |
| 26   | auto* injur*.af.                                                                                                                                   |
| 27   | car crash*.af.                                                                                                                                     |
| 28   | car accident*.af.                                                                                                                                  |
| 29   | car collision*.af.                                                                                                                                 |
| 30   | car injur*.af.                                                                                                                                     |
| 31   | (car adj3 trauma).af.                                                                                                                              |
| 32   | (automobile adj3 trauma).af.                                                                                                                       |
| 33   | (automotive adj3 trauma).af.                                                                                                                       |
| 34   | (road traffic adj3 trauma).af.                                                                                                                     |
| 35   | (motor vehicle adj3 trauma).af.                                                                                                                    |
| 36   | 1 or 2 or 3 or 4 or 5 or 6 or 7 or 8 or 9 or 10                                                                                                    |
| 37   | 11 or 12 or 13 or 14 or 15 or 16 or 17 or 18 or 19 or 20 or 21 or 22 or 23 or 24 or 25 or 26 or 27 or 28 or 29 or 30 or 31 or 32 or 33 or 34 or 35 |
| 38   | 36 and 37                                                                                                                                          |

## Appendix 2 List of excluded studies with reasons

| Study ID                 | Reason                                                                                                                                                 | Reference                                                                                                |
|--------------------------|--------------------------------------------------------------------------------------------------------------------------------------------------------|----------------------------------------------------------------------------------------------------------|
| <b>Al Mulhim, 2012</b>   | Pregnancy loss or not after trauma in Arabic pregnant women                                                                                            | <i>EMHJ. Vol. 18 No. 5 2012</i>                                                                          |
| <b>Battaloglu 2016</b>   | From a cohort of 15,140 female patients, 173 were pregnant women in the trauma registry. 55.5% of them from vehicle collision                          | <b>SR Petrone, 2017</b><br><i>Injury, Int. J. Care Injured 47 (2016) 184-187</i>                         |
| <b>Barre 2006</b>        | Pregnant women with abdominal trauma during pregnancy (n=65). Half of them from a traffic accident.                                                    | <b>SR Petrone, 2017</b><br><i>La Revue Sage-Femme. Vol 5, Issue 6, 2006, 312-316</i>                     |
| <b>Cannada 2010</b>      | Pregnant women with orthopaedic injuries (n=65)                                                                                                        | <b>SR Petrone, 2017</b><br><i>Injury, Infection, and Critical Care.2010. Vol. 69 (3)</i>                 |
| <b>Chamberlain, 2011</b> | Communication abstract. Retrospective cohort study. Identification of 272 pregnant trauma victims. 78.6% of them incurred in a MVC. No data to extract | <i>American Journal of Obstetrics &amp; Gynecology Supplement to January 2011</i>                        |
| <b>Cheng, 2012</b>       | Maternal complications during delivery according to uninjured, minor and severe injuries. 2,881 pregnant women (47,4%) involved in MVC                 | <i>World J Surg (2012) 36:2767–2775</i>                                                                  |
| <b>Connolly, 1997</b>    | 476 maternal records of trauma cases. 54.6% were MVC. No more data available                                                                           | <i>American Journal of Perinatology.1997.Vol. 14 (6)</i>                                                 |
| <b>Corsi 1999</b>        | Twenty-seven traumatised pregnant women were analysed retrospectively over a period of 9 years in Sao Paulo, Brazil                                    | <b>SR Petrone, 2017</b><br><i>Injury, Int. J. Care Injured 30 (1999) 239-243</i>                         |
| <b>Dannenberg, 1995</b>  | Homicide and other injuries as causes of maternal death between 1987 and 1991 in New York                                                              | <i>Am J Obstet Gynecol Vol.172 (5)</i>                                                                   |
| <b>Deshpande, 2017</b>   | Trauma impact on maternal mortality. Comparability between pregnant vs. non pregnant women                                                             | <i>American Journal of Obstetrics &amp; Gynecology 2017. 590.e2</i>                                      |
| <b>El Kady 2004</b>      | Retrospective cohort study of women hospitalized for Trauma in California                                                                              | <b>SR Petrone, 2017</b><br><i>American Journal of Obstetrics and Gynecology (2004) 190, 1661-8</i>       |
| <b>El Kady D, 2006</b>   | Fractures injuries on maternal/neonatal outcomes in United States                                                                                      | <b>SR Méndez -Figuroa 2013</b><br><i>American Journal of Obstetrics and Gynecology (2006) 195, 711–6</i> |
| <b>Fischer 2011</b>      | Minor trauma and poor fetal outcomes in Tennessee, Memphis                                                                                             | <b>SR Petrone, 2017</b><br><i>Injury, Infection, and Critical Care. 2011. Vol. 71 (1)</i>                |
| <b>Gibbins, 2017</b>     | Communication. MVC and Stillbirth. Secondary analysis of 439 stillbirth                                                                                | <i>American Journal of Obstetrics &amp; Gynecology Supplement to January 2017</i>                        |
| <b>Goodwin, 1990</b>     | Case-series of trauma pregnant women between 1987 and 1988 in Los Angeles                                                                              | <b>SR Méndez -Figuroa 2013</b><br><i>Am J Obstet Gynecol. 1990 Vol. 162 (3).</i>                         |
| <b>Hardt, 2013</b>       | Prenatal risk screening to identify women at increased risk for traumatic pregnancy-                                                                   | <i>Women's Health Issues 23-3 (2013) e187–e193</i>                                                       |

|                          |                                                                                                                                                                                            |                                                                                                               |
|--------------------------|--------------------------------------------------------------------------------------------------------------------------------------------------------------------------------------------|---------------------------------------------------------------------------------------------------------------|
|                          | associated death                                                                                                                                                                           |                                                                                                               |
| <b>Hardy, 1974</b>       | Maternal mortality ratios at large urban charity hospitals from 1941 to 1971                                                                                                               | <i>Obstetric and Gynecology. 1974. Vol.43 (1)</i>                                                             |
| <b>Harland 2014</b>      | Risks factors of maternal injuries in a population-based sample of pregnant women from Iowa                                                                                                | <b>SR Petrone, 2017</b><br><i>Journal of Women's Health. 2014. Vol. 23 (12)</i>                               |
| <b>Hitosugi 2006</b>     | 135 traffic accidents involving Japanese pregnant women from insurance companies. The outcomes of neonates determined by their condition 1 month after birth (death/abortion/healthy)      | <b>SR Petrone, 2017</b><br><i>Forensic Science International 159 (2006) 51-54</i>                             |
| <b>Ikossi, 2005</b>      | Risks factors of trauma in pregnant women from San Francisco, California                                                                                                                   | <i>J Am Coll Surg. Vol. 2005. 200 (1)</i>                                                                     |
| <b>Lynch, 2011</b>       | Pregnancy associated- death in Ohio: 2003-2007                                                                                                                                             | American Journal of Obstetrics & Gynecology Supplement to January 2011                                        |
| <b>Manoogian, 2015</b>   | Injuries characteristics between pregnant vs non pregnant women occupants (not outcome)                                                                                                    | <i>Accident Analysis and Prevention 74 (2015). 69-76</i>                                                      |
| <b>Melamed 2012</b>      | Outcomes following blunt trauma in Pregnant women from Israel                                                                                                                              | <b>SR Petrone, 2017</b><br><i>The Journal of Maternal-Fetal and Neonatal Medicine. 2012; 25(9): 1612-1617</i> |
| <b>Mesdaghinia, 2012</b> | Causes of trauma in 32 pregnant women with trauma in a Hospital in Iran                                                                                                                    | <i>Arch Trauma Res. 2012;1(1):23-26</i>                                                                       |
| <b>Nannini, 2008</b>     | Risks of injury in pregnant women in Massachusets                                                                                                                                          | <i>Journal of Midwifery &amp; Women's Health.2008. Vol.53 (1)</i>                                             |
| <b>Omoke, 2013</b>       | Trauma during pregnancy in a Nigerian setting                                                                                                                                              | <i>Int J Crit Illn Inj Sci. 2013; 3(4): 269-273.</i>                                                          |
| <b>Osei-Ampofo, 2016</b> | A cross-sectional study with 134 pregnant women from Ghana visiting the emergency care. Leading injury MVC (23%). Not outcomes                                                             | <i>African Journal of Emergency Medicine (2016) 6, 87-93</i>                                                  |
| <b>Pak, 1998</b>         | Delivery outcomes after a blunt abdominal trauma in 85 pregnant women                                                                                                                      | <i>Am J Obstet Gynecol. 1998. Vol. 179 (5)</i>                                                                |
| <b>Patteson, 2007</b>    | High risk factors involved in trauma during pregnancy. Not outcomes                                                                                                                        | <i>The Journal of TRAUMA Injury, Infection, and Critical Care. 2007. Vol 62 (4)</i>                           |
| <b>Pearlman, 1990</b>    | Not possible to assess full text                                                                                                                                                           | SR Méndez -Figueroa 2013                                                                                      |
| <b>Schiff, 1997</b>      | Seat Bealt use. Protective factor of maternal mortality after a MVC in Mexico                                                                                                              | <i>WJM, 1997. Vol. 167 (1)</i>                                                                                |
| <b>Schuster, 2016</b>    | Communication abstract. Impact of blunt trauma on maternal and pregnancy outcome. MVC the most common injury mechanism (70%). Pennsylvania Trauma Systems Foundation Database (1996-2013). | <i>American Journal of Obstetrics &amp; Gynecology. Supplement to January 2016</i>                            |
| <b>Schuster, 2018</b>    | Pennsylvania Trauma Systems Foundation Database. ISS>9 and SBP<90mmHg are predictors for poor outcomes after trauma during pregnancy                                                       | <i>Trauma, 2018. Vol. 20(1) 30-37</i>                                                                         |
| <b>Sela, 2011</b>        | Treatment provided to pregnant motor vehicle accident (MVA) casualties in a mature trauma system in Israel                                                                                 | <i>Annals of Surgery, 2011.Vol.254 (2)</i>                                                                    |

|                            |                                                                                                                               |                                                                                                                                        |
|----------------------------|-------------------------------------------------------------------------------------------------------------------------------|----------------------------------------------------------------------------------------------------------------------------------------|
| <b>Shah, 1998</b>          | Trauma in general in pregnant women                                                                                           | <i>J Trauma. 1998 Jul;45(1):83-6</i>                                                                                                   |
| <b>Shakerian 2015</b>      | Determining adherence to recommended imaging guidelines in pregnant women from Victoria, Australia                            | <b>SR Petrone, 2017</b><br><i>J Trauma Acute Care Surg. 2015.Vol. 78 (1)</i>                                                           |
| <b>Shiff 2002</b>          | Retrospective cohort study to assess outcomes of pregnant women hospitalized for injury in Washington State from 1989 to 1997 | <b>SR Petrone, 2017</b><br><i>J Trauma. 2002; 53: 939–945.</i>                                                                         |
| <b>Sirin, 2007</b>         | Report the prevalence of seatbelt counselling by prenatal care providers during pregnancy in USA                              | <i>Matern Child Health J (2007) 11:505–510</i>                                                                                         |
| <b>Tinker 2010</b>         | Risks factors involved in injuries in pregnant women from the National Birth Defects Prevention Study, USA                    | <b>SR Petrone, 2017</b><br><i>Journal of Women’s Health. 2010. Vol. 19 (2)</i>                                                         |
| <b>Van der Knoop, 2015</b> | Effect of maternal trauma in fetal motility at term and at one year of age                                                    | <i>Early Human Development 91 (2015) 511–517</i>                                                                                       |
| <b>Van der Knoop, 2018</b> | Matched case-control study. Neurobehavioral outcome in 6-18 year old children after trauma in pregnancy                       | <i>European Journal of Paediatric Neurology (2018), 22(5):845-853</i>                                                                  |
| <b>Vladutiu, 2013b</b>     | Same sample Vladutiu 2013a; excluded as a secondary analysis from already included study                                      | <i>Accid Anal Prev. 2013; 55: 165–171</i>                                                                                              |
| <b>Wahabi, 2007</b>        | 45 MVC case series pregnant women collected over a 10- year period                                                            | <i>Saudi Med J. 2007. Vol. 28 (9)</i>                                                                                                  |
| <b>Wall 2014</b>           | Pregnant trauma patients from South Africa (mainly assaults)                                                                  | <b>SR Petrone, 2017</b><br><i>Injury, Int. J. Care Injured 45 (2014) 1220–1223</i>                                                     |
| <b>Weiner 2016</b>         | Minor trauma during pregnancy, not associated with adverse pregnancy outcomes, Israel                                         | <b>SR Petrone, 2017</b><br><i>European Journal Of Obstetrics &amp; Gynecology and Reproductive Biology 203 (2016): 78–81</i>           |
| <b>Weiss, 1999</b>         | Retrospect review of death certificates                                                                                       | <i>43rd Annual Proceedings Association for the Advancement of Automotive Medicine September 20-21, 1999. Barcelona (Sitges), Spain</i> |
| <b>Weiss, 2001</b>         | Retrospect review of death certificates                                                                                       | <i>JAMA, 2001. Vol. 286 (15)</i>                                                                                                       |
| <b>Weiss, 2002a</b>        | N/A                                                                                                                           |                                                                                                                                        |
| <b>Zangene, 2015</b>       | 102 cases of trauma in pregnancy registered in Iran from 2007 to 2010. MVC the most frequent (45%)                            | <i>Global Journal of Health Science. 2015. Vol 7 (2)</i>                                                                               |

## maternal outcomes

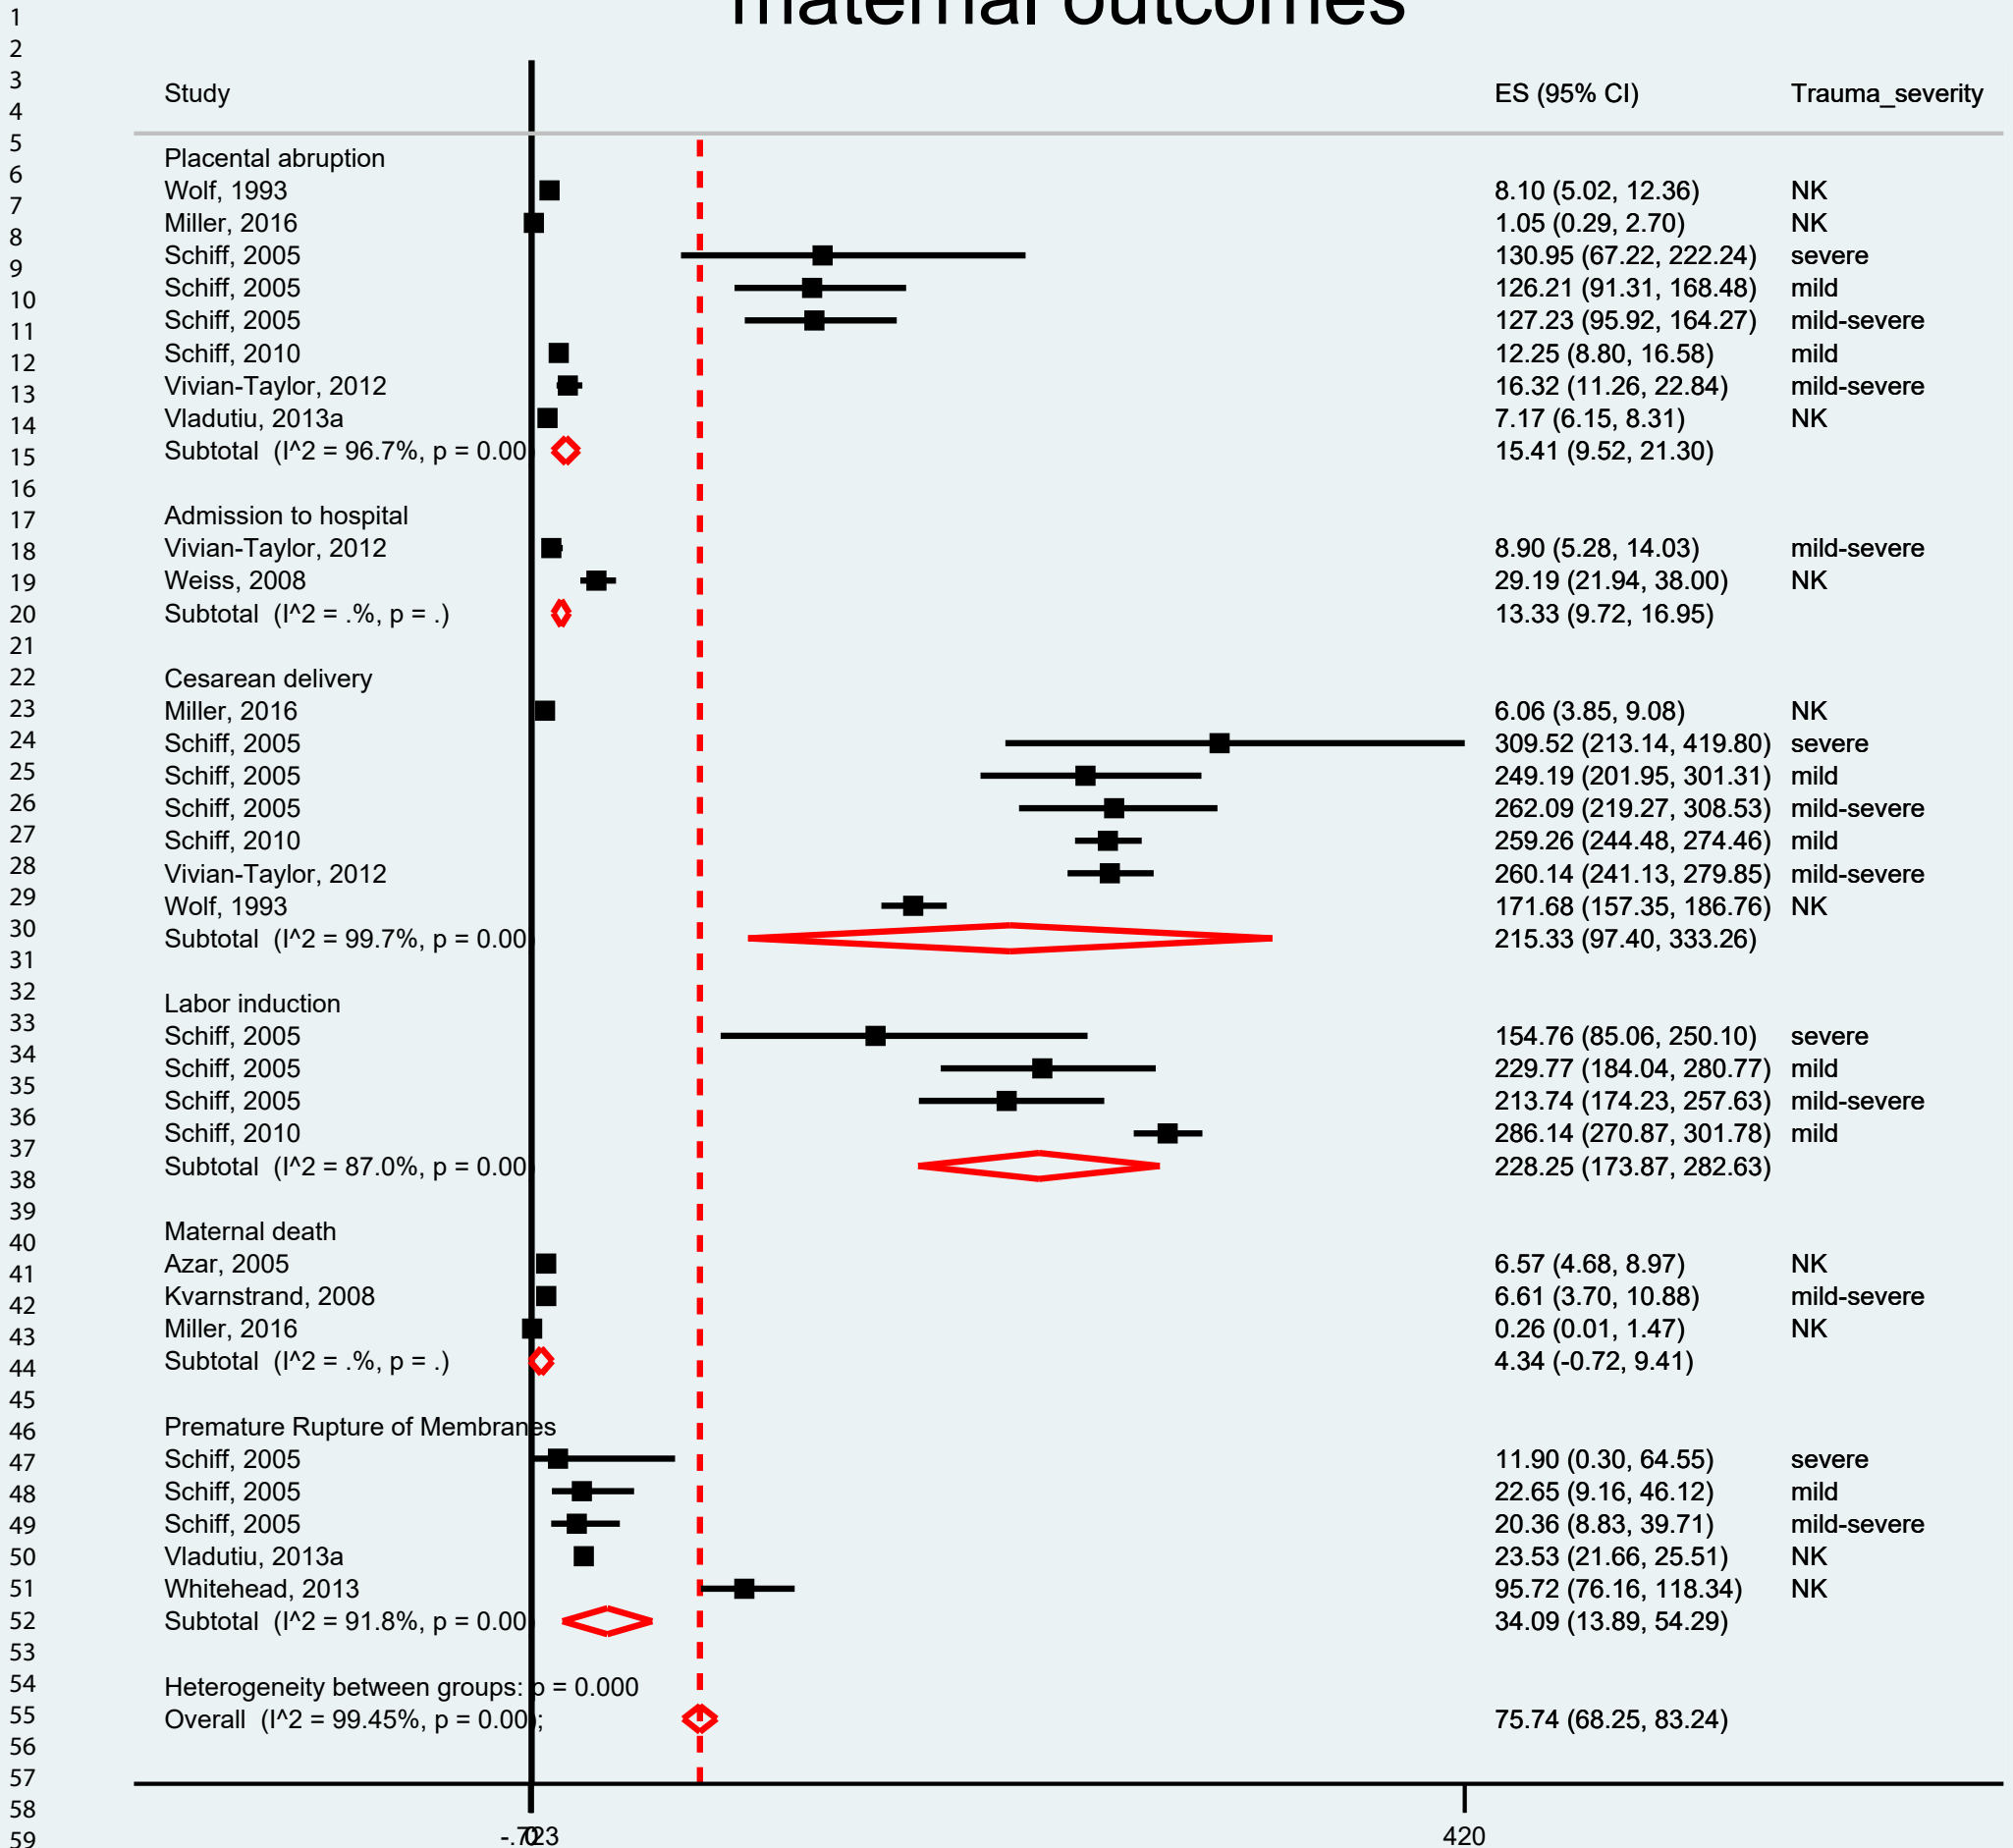



# offspring outcomes

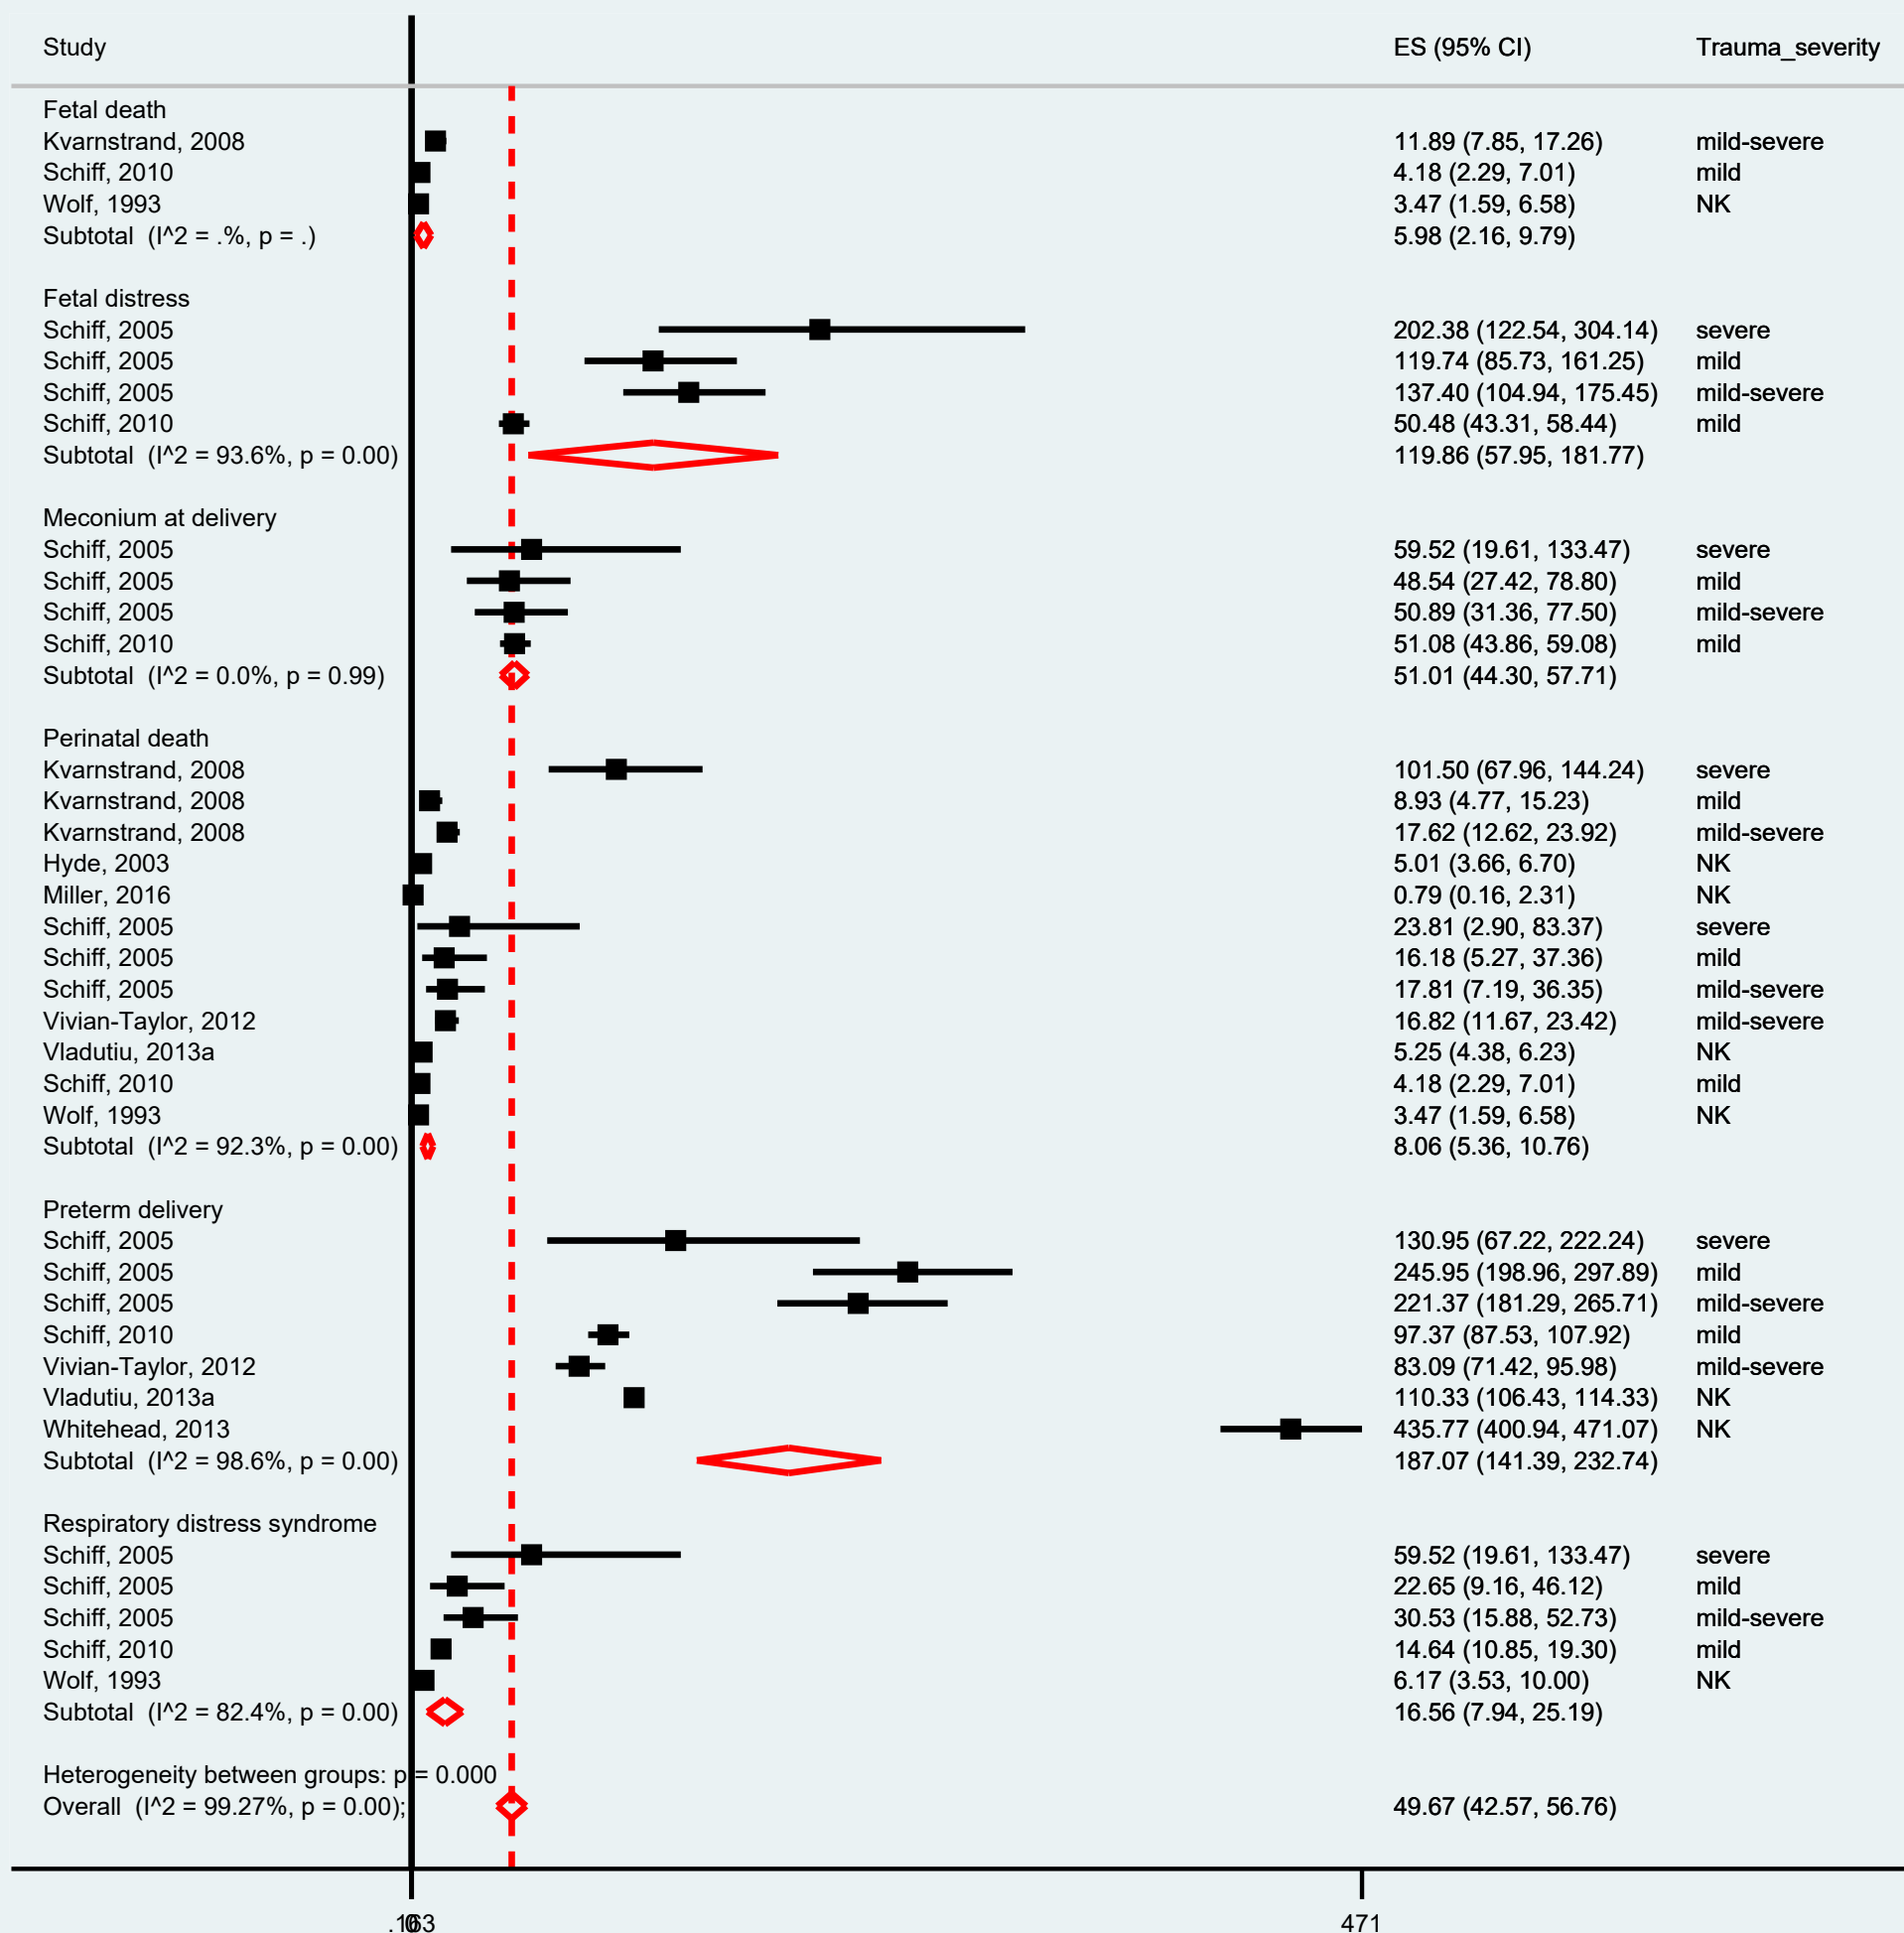

## Appendix 5. Incidence of maternal, fetal &amp; neonatal complications from single studies

| Outcome                           | Total sample size | Incidence estimate per 1,000 women (95%CI) |
|-----------------------------------|-------------------|--------------------------------------------|
| <b>Maternal outcomes</b>          |                   |                                            |
| Placental problems                | 235329            | 100.00 (98.79, 101.22)                     |
| Miscarriage                       | 3794              | 1.85 (0.74, 3.80)                          |
| Antepartum haemorrhage            | 2022              | 47.48 (38.62, 57.67)                       |
| Postpartum haemorrhage            | 2022              | 77.65 (66.35, 90.18)                       |
| Vaginal bleeding                  | 235329            | 247.00 (245.26, 248.75)                    |
| Hospital stay $\geq 6$ days       | 5936              | 117.92 (109.82, 126.40)                    |
| Maternal death or hospitalisation | 32810             | 135.05 (131.37, 138.80)                    |
| <b>Fetal and neonatal</b>         |                   |                                            |
| Hypoxia                           | 582               | 22.34 (11.95, 37.89)                       |
| Neonatal death                    | 2270              | 5.73 (3.05, 9.77)                          |
| Neonatal transfer                 | 2022              | 42.53 (34.16, 52.26)                       |

## Appendix 6. Incidence in non-population level data

| Outcome                      | Study ID            | Number of events | Group size | Trauma severity level |
|------------------------------|---------------------|------------------|------------|-----------------------|
| <b>Admission to hospital</b> | Brookfield, 2013    | 182              | 256        | Not given             |
|                              | Chibber, 2015       | 648              | 728        | Not given             |
| <b>Caesarean delivery</b>    | Chibber, 2015       | 529              | 728        | Not given             |
|                              | Luley 2013          | 32               | 126        | Not given             |
|                              | Orji, 2002          | 2                | 84         | Not given             |
| <b>Fetal death</b>           | Aboutanos, 2007     | 1                | 148        | Not given             |
|                              | Chibber, 2015       | 78               | 728        | Not given             |
| <b>Fetal distress</b>        | Chibber, 2015       | 412              | 728        | Not given             |
| <b>Fetal tachycardia</b>     | Orji, 2002          | 10               | 84         | Not given             |
| <b>Hydrops fetalis</b>       | Aboutanos, 2007     | 1                | 148        | Not given             |
|                              |                     |                  |            |                       |
| <b>Maternal death</b>        | Aboutanos, 2007     | 0                | 148        | Not given             |
|                              | Baerga-Varela, 2000 | 1                | 39         | Severe                |
|                              | Brookfield, 2013    | 7                | 256        | Not given             |
|                              | Chibber, 2015       | 100              | 728        | Not given             |
| <b>Maternal death</b>        | Orji, 2002          | 2                | 84         | Not given             |
| <b>Miscarriage</b>           | Aboutanos, 2007     | 5                | 148        | Not given             |
|                              | Baerga-Varela, 2000 | 7                | 39         | Mild to severe        |
| <b>Perinatal death</b>       | Baerga-Varela, 2000 | 23               | 39         | Mild to severe        |
|                              | Luley 2013          | 6                | 126        | Not given             |
|                              | Orji, 2002          | 3                | 84         | Not given             |
| <b>Placental abruption</b>   | Chibber, 2015       | 428              | 728        | Not given             |
|                              | Luley 2013          | 7                | 126        | Not given             |
|                              | Orji, 2002          | 1                | 84         | Not given             |
| <b>Preterm delivery</b>      | Chibber, 2015       | 97               | 728        | Not given             |
| <b>Uterine rupture</b>       | Chibber, 2015       | 12               | 728        | Not given             |
|                              | Orji, 2002          | 1                | 84         | Not given             |

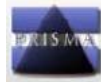

# PRISMA 2009 Checklist

| Section/topic                      | #  | Checklist item                                                                                                                                                                                                                                                                                              | Reported on page # |
|------------------------------------|----|-------------------------------------------------------------------------------------------------------------------------------------------------------------------------------------------------------------------------------------------------------------------------------------------------------------|--------------------|
| <b>TITLE</b>                       |    |                                                                                                                                                                                                                                                                                                             |                    |
| Title                              | 1  | Identify the report as a systematic review, meta-analysis, or both.                                                                                                                                                                                                                                         | 1                  |
| <b>ABSTRACT</b>                    |    |                                                                                                                                                                                                                                                                                                             |                    |
| Structured summary                 | 2  | Provide a structured summary including, as applicable: background; objectives; data sources; study eligibility criteria, participants, and interventions; study appraisal and synthesis methods; results; limitations; conclusions and implications of key findings; systematic review registration number. | 2-3                |
| <b>INTRODUCTION</b>                |    |                                                                                                                                                                                                                                                                                                             |                    |
| Rationale                          | 3  | Describe the rationale for the review in the context of what is already known.                                                                                                                                                                                                                              | 4                  |
| Objectives                         | 4  | Provide an explicit statement of questions being addressed with reference to participants, interventions, comparisons, outcomes, and study design (PICOS).                                                                                                                                                  | 5                  |
| <b>METHODS</b>                     |    |                                                                                                                                                                                                                                                                                                             |                    |
| Protocol and registration          | 5  | Indicate if a review protocol exists, if and where it can be accessed (e.g., Web address), and, if available, provide registration information including registration number.                                                                                                                               | 5                  |
| Eligibility criteria               | 6  | Specify study characteristics (e.g., PICOS, length of follow-up) and report characteristics (e.g., years considered, language, publication status) used as criteria for eligibility, giving rationale.                                                                                                      | 5-7                |
| Information sources                | 7  | Describe all information sources (e.g., databases with dates of coverage, contact with study authors to identify additional studies) in the search and date last searched.                                                                                                                                  | 5                  |
| Search                             | 8  | Present full electronic search strategy for at least one database, including any limits used, such that it could be repeated.                                                                                                                                                                               | Appendix 1         |
| Study selection                    | 9  | State the process for selecting studies (i.e., screening, eligibility, included in systematic review, and, if applicable, included in the meta-analysis).                                                                                                                                                   | 5-6,<br>Appendix 2 |
| Data collection process            | 10 | Describe method of data extraction from reports (e.g., piloted forms, independently, in duplicate) and any processes for obtaining and confirming data from investigators.                                                                                                                                  | 6-7                |
| Data items                         | 11 | List and define all variables for which data were sought (e.g., PICOS, funding sources) and any assumptions and simplifications made.                                                                                                                                                                       | 5-7                |
| Risk of bias in individual studies | 12 | Describe methods used for assessing risk of bias of individual studies (including specification of whether this was done at the study or outcome level), and how this information is to be used in any data synthesis.                                                                                      | 7                  |
| Summary measures                   | 13 | State the principal summary measures (e.g., risk ratio, difference in means).                                                                                                                                                                                                                               | 7-8                |
| Synthesis of results               | 14 | Describe the methods of handling data and combining results of studies, if done, including measures of consistency (e.g., $I^2$ ) for each meta-analysis                                                                                                                                                    | 8                  |

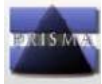

# PRISMA 2009 Checklist

Page 1 of 2

| Section/topic                 | #  | Checklist item                                                                                                                                                                                           | Reported on page #                                       |
|-------------------------------|----|----------------------------------------------------------------------------------------------------------------------------------------------------------------------------------------------------------|----------------------------------------------------------|
| Risk of bias across studies   | 15 | Specify any assessment of risk of bias that may affect the cumulative evidence (e.g., publication bias, selective reporting within studies).                                                             | 7-8                                                      |
| Additional analyses           | 16 | Describe methods of additional analyses (e.g., sensitivity or subgroup analyses, meta-regression), if done, indicating which were pre-specified.                                                         | 7-8                                                      |
| <b>RESULTS</b>                |    |                                                                                                                                                                                                          |                                                          |
| Study selection               | 17 | Give numbers of studies screened, assessed for eligibility, and included in the review, with reasons for exclusions at each stage, ideally with a flow diagram.                                          | 8, <b>Figure 1</b>                                       |
| Study characteristics         | 18 | For each study, present characteristics for which data were extracted (e.g., study size, PICOS, follow-up period) and provide the citations.                                                             | 8, <b>Table 1</b>                                        |
| Risk of bias within studies   | 19 | Present data on risk of bias of each study and, if available, any outcome level assessment (see item 12).                                                                                                | 8, 9, <b>Figure 2</b>                                    |
| Results of individual studies | 20 | For all outcomes considered (benefits or harms), present, for each study: (a) simple summary data for each intervention group (b) effect estimates and confidence intervals, ideally with a forest plot. | 9,10 <b>Table 2, Figure 3 Figure S1,S2 Appendix 5, 6</b> |
| Synthesis of results          | 21 | Present results of each meta-analysis done, including confidence intervals and measures of consistency.                                                                                                  | 10, <b>Appendix 3, 4</b>                                 |
| Risk of bias across studies   | 22 | Present results of any assessment of risk of bias across studies (see Item 15).                                                                                                                          | 8,9 <b>Figure 2</b>                                      |
| Additional analysis           | 23 | Give results of additional analyses, if done (e.g., sensitivity or subgroup analyses, meta-regression [see Item 16]).                                                                                    | 9,10 <b>Figure S1, S2</b>                                |
| <b>DISCUSSION</b>             |    |                                                                                                                                                                                                          |                                                          |
| Summary of evidence           | 24 | Summarize the main findings including the strength of evidence for each main outcome; consider their relevance to key groups (e.g., healthcare providers, users, and policy makers).                     | 10                                                       |
| Limitations                   | 25 | Discuss limitations at study and outcome level (e.g., risk of bias), and at review-level (e.g., incomplete retrieval of identified research, reporting bias).                                            | 11                                                       |

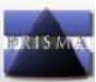

# PRISMA 2009 Checklist

1  
2  
3  
4  
5  
6  
7  
8  
9  
10  
11  
12  
13  
14  
15  
16  
17  
18  
19  
20  
21  
22  
23  
24  
25  
26  
27  
28  
29  
30  
31  
32  
33  
34  
35  
36  
37  
38  
39  
40  
41  
42  
43  
44  
45  
46  
47

|                |    |                                                                                                                                            |    |
|----------------|----|--------------------------------------------------------------------------------------------------------------------------------------------|----|
| Conclusions    | 26 | Provide a general interpretation of the results in the context of other evidence, and implications for future research.                    | 12 |
| <b>FUNDING</b> |    |                                                                                                                                            |    |
| Funding        | 27 | Describe sources of funding for the systematic review and other support (e.g., supply of data); role of funders for the systematic review. | 3  |

From: Moher D, Liberati A, Tetzlaff J, Altman DG, The PRISMA Group (2009). Preferred Reporting Items for Systematic Reviews and Meta-Analyses: The PRISMA Statement. PLoS Med 6(7): e1000097. doi:10.1371/journal.pmed1000097

For more information, visit: [www.prisma-statement.org](http://www.prisma-statement.org).

For peer review only

# BMJ Open

## Maternal trauma due to motor vehicle crashes and pregnancy outcomes: A systematic review and meta-analysis

|                                 |                                                                                                                                                                                                                                                                                                                                                                                                                                                                                                                                                                                                                                                                                                                                                                                                                                                                                                                                                                                                                                                                                                                                                                                                                                                     |
|---------------------------------|-----------------------------------------------------------------------------------------------------------------------------------------------------------------------------------------------------------------------------------------------------------------------------------------------------------------------------------------------------------------------------------------------------------------------------------------------------------------------------------------------------------------------------------------------------------------------------------------------------------------------------------------------------------------------------------------------------------------------------------------------------------------------------------------------------------------------------------------------------------------------------------------------------------------------------------------------------------------------------------------------------------------------------------------------------------------------------------------------------------------------------------------------------------------------------------------------------------------------------------------------------|
| Journal:                        | <i>BMJ Open</i>                                                                                                                                                                                                                                                                                                                                                                                                                                                                                                                                                                                                                                                                                                                                                                                                                                                                                                                                                                                                                                                                                                                                                                                                                                     |
| Manuscript ID                   | bmjopen-2019-035562.R2                                                                                                                                                                                                                                                                                                                                                                                                                                                                                                                                                                                                                                                                                                                                                                                                                                                                                                                                                                                                                                                                                                                                                                                                                              |
| Article Type:                   | Original research                                                                                                                                                                                                                                                                                                                                                                                                                                                                                                                                                                                                                                                                                                                                                                                                                                                                                                                                                                                                                                                                                                                                                                                                                                   |
| Date Submitted by the Author:   | 09-Jul-2020                                                                                                                                                                                                                                                                                                                                                                                                                                                                                                                                                                                                                                                                                                                                                                                                                                                                                                                                                                                                                                                                                                                                                                                                                                         |
| Complete List of Authors:       | Amezcuca-Prieto, Carmen; University of Granada Faculty of Medicine, Preventive Medicine and Public Health<br>Ross, Jennifer; Barts and The London School of Medicine and Dentistry Blizard Institute<br>Rogozińska, Ewelina; Queen Mary University of London, Women's Health Research Unit, Barts and the London School of Medicine and Dentistry, Queen Mary University of London; University College London, Clinical Trial Unit<br>Mighiu, Patricia; Barts and The London School of Medicine and Dentistry<br>Martínez-Ruiz, Virginia; University of Granada Faculty of Medicine, Preventive Medicine and Public Health<br>Brohi, Karim; Queen Mary University of London, Centre for Trauma Sciences; Barts Health NHS Trust<br>Bueno Cavanillas, Aurora; University of Granada Faculty of Medicine, Preventive Medicine and Public Health<br>Khan , Khalid; Barts and The London School of Medicine and Dentistry, Women's Health Institute; University of Granada Faculty of Medicine, Preventive Medicine and Public Health<br>Thangaratinam, Shakila; Birmingham Women's and Children's Hospitals NHS Foundation Trust; Queen Mary University of London, Women's Health Research Unit, Barts and the London School of Medicine and Dentistry |
| <b>Primary Subject Heading</b>: | Public health                                                                                                                                                                                                                                                                                                                                                                                                                                                                                                                                                                                                                                                                                                                                                                                                                                                                                                                                                                                                                                                                                                                                                                                                                                       |
| Secondary Subject Heading:      | Obstetrics and gynaecology, Medical publishing and peer review                                                                                                                                                                                                                                                                                                                                                                                                                                                                                                                                                                                                                                                                                                                                                                                                                                                                                                                                                                                                                                                                                                                                                                                      |
| Keywords:                       | ACCIDENT & EMERGENCY MEDICINE, EPIDEMIOLOGY, OBSTETRICS                                                                                                                                                                                                                                                                                                                                                                                                                                                                                                                                                                                                                                                                                                                                                                                                                                                                                                                                                                                                                                                                                                                                                                                             |
|                                 |                                                                                                                                                                                                                                                                                                                                                                                                                                                                                                                                                                                                                                                                                                                                                                                                                                                                                                                                                                                                                                                                                                                                                                                                                                                     |

SCHOLARONE™  
Manuscripts



I, the Submitting Author has the right to grant and does grant on behalf of all authors of the Work (as defined in the below author licence), an exclusive licence and/or a non-exclusive licence for contributions from authors who are: i) UK Crown employees; ii) where BMJ has agreed a CC-BY licence shall apply, and/or iii) in accordance with the terms applicable for US Federal Government officers or employees acting as part of their official duties; on a worldwide, perpetual, irrevocable, royalty-free basis to BMJ Publishing Group Ltd ("BMJ") its licensees and where the relevant Journal is co-owned by BMJ to the co-owners of the Journal, to publish the Work in this journal and any other BMJ products and to exploit all rights, as set out in our [licence](#).

The Submitting Author accepts and understands that any supply made under these terms is made by BMJ to the Submitting Author unless you are acting as an employee on behalf of your employer or a postgraduate student of an affiliated institution which is paying any applicable article publishing charge ("APC") for Open Access articles. Where the Submitting Author wishes to make the Work available on an Open Access basis (and intends to pay the relevant APC), the terms of reuse of such Open Access shall be governed by a Creative Commons licence – details of these licences and which [Creative Commons](#) licence will apply to this Work are set out in our licence referred to above.

Other than as permitted in any relevant BMJ Author's Self Archiving Policies, I confirm this Work has not been accepted for publication elsewhere, is not being considered for publication elsewhere and does not duplicate material already published. I confirm all authors consent to publication of this Work and authorise the granting of this licence.



1  
2  
3 **1 Maternal trauma due to motor vehicle crashes and pregnancy outcomes: A systematic review**  
4 **and meta-analysis**  
5  
6  
7

8 *Amezcuca-Prieto C<sup>1,2,3</sup>, Ross J<sup>4</sup>, Rogozińska E,<sup>5,6</sup>Mighiu P<sup>5</sup>, Martínez-Ruiz V<sup>1,2,3</sup>, Brohi K<sup>4</sup>, Bueno-*  
9 *Cavanillas A<sup>1,2,3\*</sup>, Khan KS<sup>1,5</sup>, Thangaratnam S<sup>5</sup>*  
10  
11  
12  
13

14 <sup>1</sup>*Department of Preventive Medicine and Public Health. Faculty of Medicine. University of Granada.*

15 *Avenida de la Investigación, 11; 18071 Granada, Spain*

16 <sup>2</sup>*CIBER de Epidemiología y Salud Pública. (CIBERESP), Granada, Spain*

17 <sup>3</sup>*Instituto de Investigación Biosanitaria ibs.GRANADA, Granada, Spain*

18 <sup>4</sup>*Centre for Trauma Sciences, Queen Mary University of London, London, United Kingdom*

19 <sup>5</sup>*Women's Health Research Unit, Barts and the London School of Medicine and Dentistry, London,*  
20 *United Kingdom*

21 <sup>6</sup>*Meta-analysis Group, MRC Clinical Trials Unit, University College London, London, United*  
22 *Kingdom*  
23  
24

25  
26  
27  
28  
29  
30 **18 Correspondence to:**

31 **19 Aurora Bueno-Cavanillas, PhD, Professor**

32 Professor of Preventive Medicine and Public Health

33 Department of Preventive Medicine and Public Health, Faculty of Medicine, The University of  
34 Granada, Avenida de la Investigación, 11; 18016 Granada, Spain

35 CIBER de Epidemiología y Salud Pública. (CIBERESP), Granada, Spain,

36 Instituto de Investigación Biosanitaria ibs.GRANADA, Granada, Spain

37 Email: [abueno@ugr.es](mailto:abueno@ugr.es)  
38  
39  
40  
41  
42  
43  
44  
45  
46  
47  
48  
49  
50  
51  
52  
53  
54  
55  
56  
57  
58  
59  
60

1  
2  
3 **28 Abstract**

4  
5 **29 Objectives**

6  
7 30 To systematically review and quantify the effect of motor vehicle crashes (MVC) in pregnancy on  
8  
9 31 maternal and offspring outcomes.

10  
11 **32 Design**

12  
13 33 Systematic review and meta-analysis of observational data searched from inception until July 1, 2018.  
14  
15 34 Searching was from June to August 2018 in Medline, Embase, Web of Science, Scopus, LILACS  
16  
17 35 SciELO, TRANSPORT, IRRD, TRANSDOC, CDSR, and Cochrane Central Register CENTRAL.

18  
19  
20 **36 Participants**

21  
22 37 Studies were selected if they focused on the effects of exposure MVC during pregnancy vs. non-  
23  
24 38 exposure, with follow up to verify outcomes in various settings, including secondary care, collision and  
25  
26 39 emergency, and inpatient care.

27  
28 **40 Data synthesis**

29  
30 41 For incidence data, we calculated a pooled estimate per 1,000 women. For comparison of outcomes  
31  
32 42 between women involved and those not involved in MVC, we calculated odds ratios with 95%  
33  
34 43 confidence intervals. Where possible, we statistically pooled the data using the random-effects model.  
35  
36 44 The quality of studies used in the comparative analysis was assessed with Newcastle-Ottawa Scale.

37  
38  
39 **45 Results**

40  
41 46 We included 19 studies (3,222,066 women) of which the majority was carried out in high-income  
42  
43 47 countries (18/19). In population-level studies of women involved in MVC, maternal death occurred in  
44  
45 48 3.6 per 1,000 (95% CI 0.25 to 10.42; 3 studies, 12,000 women; Tau= 1.77), and fetal death or stillbirth  
46  
47 49 in 6.6 per 1,000 (95% CI 3.81 to 10.12; 8 studies, 47,992 women; I<sup>2</sup>=92.6%). Pooled incidence of  
48  
49 50 complications per 1,000 women involved in MVC was labour induction (276.43), preterm delivery  
50  
51 51 (191.90) and caesarean section (166.65). Compared to women not involved in MVC, those involved  
51  
52 52 had increased odds of placental abruption (OR 1.43, 95% CI 1.27 to 1.63; 3 studies, 1,500,825 women)  
52  
53 53 and maternal death (OR 202.27; 95% CI 110.60 to 369.95; 1 study, 1,094,559 women).

54  
55  
56  
57  
58 **54 Conclusion:** Pregnant women involved in MVC were at higher risk of maternal death and  
59  
60 55 complications than those not involved.

1  
2  
3 56 **PROSPERO registration:** CRD42018100788  
4

5 57 **Key terms:** Pregnancy; motor vehicle crashes; pregnancy complications  
6

7 58 **Word count:** 300  
8

9 59 **Strengths and limitations of this study**  
10

- 11  
12 60 • This is the first systematic review examining the link between involvement in MVC,  
13 mortality and adverse outcomes that includes evaluation of study quality assessment.  
14 61  
15 62 • This is the second systematic review looking at outcomes following MVC in pregnancy.  
16 63  
17 64 • We conducted our review using a prospectively registered protocol and reported it in  
18 65 accordance with the international standards.  
19 66  
20 67 • Outcomes variables correspond to any trimester, not to specific trimesters.  
21 68  
22 69 • Outcomes according to seatbelt use are scarce, since only two studies use population-level  
23 70 data.  
24  
25  
26  
27  
28

29 68 **Funding statement**  
30

31 69 This research received no specific grant from any funding agency in the public, commercial or not-  
32 70 for-profit sectors.  
33  
34

35 71 **Competing interest's statement**  
36

37 72 There are non-financial associations that may be relevant to the submitted manuscript.  
38  
39  
40 73  
41  
42  
43  
44  
45  
46  
47  
48  
49  
50  
51  
52  
53  
54  
55  
56  
57  
58  
59  
60

only

## 74 **Introduction**

75  
76 Up to half of all women in developed countries drive motor vehicles (1) and the consequences of road  
77 traffic-related injuries involving pregnant women can be severe (2). Indeed, motor vehicle crashes  
78 (MVC) are the most common cause of non-obstetric trauma associated with fetal deaths (2.3 per  
79 100,000 live births) (3). The risk of adverse outcomes resulting from an MVC increases in the second  
80 trimester of pregnancy if the pregnant women were the driver (4); however, this does not appear to be  
81 the case for pregnant passengers or pedestrians (5). A maternal mortality rate of 3.5 women per 100,000  
82 is reported following MVCs in pregnant women (6). Mechanisms of injury recorded within the pregnant  
83 population of the UK national trauma registry, the Trauma Audit and Research Network (TARN), saw  
84 an increased rate of vehicular collision in pregnant women when compared to the non-pregnant cohort  
85 (7). In 2001-2008, 2.9% of pregnant women in North Carolina were drivers in one or more crashes (8).  
86 In the USA, data from the National Automotive Sampling System (NASS/CDS) reflects that when  
87 vehicles with pregnant women are involved in collision, 50% of those women will sustain an injury(9).  
88 There are few safety guidelines on travelling by car during pregnancy (10-12). The focus of these tends  
89 to be on questions around the use of seatbelts and the activation of airbags in the car (12).

90  
91 There is a reported association between MVC and maternal mortality (13). Moreover, further  
92 associations such as the trigger for immediate delivery or being more likely to die are reported with  
93 severe blunt injury (Injury Severity Score (ISS) of 9 or above, or systolic blood pressure (SBP)  
94 <90mmHg on arrival) (14). Involvement in MVC is also associated with perinatal mortality (15),  
95 injuries to the abdominal region (16), placental abruption secondary to increased intra-abdominal  
96 pressure (17), preterm birth, and caesarean section (6). However, more data are required in relation to  
97 areas such as fetal outcomes and higher risk pregnancies, particularly regarding sociodemographic  
98 characteristics of the mother, specific trimester of pregnancy when exposed to trauma, socioeconomic  
99 country conditions, severity and type of trauma, and collision characteristics such as speed. A  
100 systematic review on trauma in pregnancy (including five studies reporting complications of  
101 involvement in MVC, and fourteen other studies on others form of trauma) showed that MVC and

1  
2  
3 102 domestic violence were the most common causes of traumatic injury during pregnancy (4). No quality  
4  
5 103 assessment of the included studies was reported in this review. Previous non-systematic reviews have  
6  
7 104 published strategies used to monitor women and fetuses after a crash (18-21). However, to our  
8  
9 105 knowledge there is no systematic review or meta-analysis focused on the maternal and fetal outcomes  
10  
11 106 after MVC in pregnancy.

12 107

### 13 108 *Review objectives*

14  
15  
16 109 As the clinical impact on the mother and fetus after MVC has not been well documented, we conducted  
17  
18 110 a systematic review of the effect on maternal and fetal outcomes of MVC in pregnant women, compared  
19  
20 111 to those not involved in a collision.

21 112

### 22 113 **Methods**

23  
24  
25 114 We conducted a systematic review and reported it according to recommended standards (22). The  
26  
27 115 review was prospectively registered with PROSPERO (no. CRD42018100788).

28 116

### 29 117 *Literature search*

30  
31  
32 118 Searching was from June to August 2018. The following databases were used to identify relevant  
33  
34 119 literature: Medline, Embase, Web of Science, Scopus, LILACS (Latin-American and Caribbean System  
35  
36 120 on Health Sciences Information), Science Citation Index, SciELO (Scientific Electronic Library  
37  
38 121 Online), TRANSPORT, IRRD (International Road Research Documentation), TRANSDOC (European  
39  
40 122 Conference of Ministers of Transportation databases), Cochrane Database of Systematic Reviews  
41  
42 123 (CDSR), and Cochrane Central Register of Controlled Trials (CENTRAL). We also sought to identify  
43  
44 124 unpublished research or research reported in the grey literature by searching a range of relevant  
45  
46 125 databases, including the Inside Conferences, Systems for Information on Grey Literature (SIGLE) and  
47  
48 126 Dissertation Abstracts. Furthermore, the searches of the medical database were supplemented with the  
49  
50 127 Internet search using a general search engine (e.g. Google, [www.google.co.uk/](http://www.google.co.uk/)) and safetylit.org.  
51  
52 128 Language and date restrictions were not applied to electronic searches. Relevant studies were identified  
53  
54 129 using a combination of, but not limited to, the medical subject headings (MeSH) and keywords for

1  
2  
3 130 “motor vehicle collision” (OR road traffic collision OR crash OR collision) and “pregnancy” (OR  
4  
5 131 pregnant women OR gravid women OR childbearing women OR maternal).  
6

7 132  
8

9 133 *Review inclusion criteria*

11 134 Papers were selected if they studied the effects of exposure to trauma due to involvement in an MVC  
12  
13 135 during pregnancy vs. non-exposure, with follow up to verify outcomes in various settings including  
14  
15 136 secondary care, collision and emergency, and inpatient care. Observational studies (cohort studies, case-  
16  
17 137 control design, non-intervention arms of randomised controlled trials) were included. Case series and  
18  
19 138 case reports were excluded. Appendix 1 shows the search strategy for Medline (via Ovid) and Appendix  
20  
21 139 2 the excluded studies with reasons.  
22  
23

24 140  
25

26 141 *Data extraction and study quality assessment*

28 142 A double screening of papers was carried out. Two reviewers (CAP & JR) independently extracted the  
29  
30 143 relevant data from each full-text article and data were recorded using a standardized data extraction  
31  
32 144 form. A data extraction form was piloted for each study design and amended as required. Discrepancies  
33  
34 145 were resolved by consensus or by a discussion with a third senior author (ER). We extracted data on a)  
35  
36 146 severe adverse maternal outcomes such as maternal death, miscarriage and preterm birth (<37/40 and  
37  
38 147 <34/40); b) severe adverse fetal outcomes such as intrauterine death/stillbirth and neonatal death.  
39  
40 148 Secondary outcomes were: a) individual components of maternal outcomes such as preterm labour,  
41  
42 149 mode of delivery (vaginal delivery vs caesarean section), premature rupture of membranes (PROM),  
43  
44 150 preterm premature rupture of membranes (PPROM), placental abruption, chorioamnionitis/sepsis and  
45  
46 151 maternal admission to an intensive care unit (ICU) or high dependency unit (HDU); b) individual  
47  
48 152 components of fetal outcomes: respiratory distress syndrome, neonatal ICU admission, low birth weight  
49  
50 153 (LBW) and small for gestational age (SGA).  
51  
52

53 154  
54

55  
56 155 We also extracted data on 1) adverse outcomes in pregnant women involved in MVC and their offspring  
57  
58 156 in subgroups according to maternal characteristics (low, high and any risk), trimester of exposure,  
59  
60 157 country (low and middle income, high income), type of trauma (penetrating, blunt, burns), severity of

1  
2  
3 158 trauma (mild, moderate, severe), seatbelt use (yes, no), study quality (low, high); 2) risk factors for  
4  
5 159 pregnancy complications following MVC such as maternal characteristics (age, parity, high risk  
6  
7 160 pregnancy, gestational age), type of trauma, type of motor vehicle, type of collision, collision  
8  
9 161 characteristic (stationary, high or moderate speed) and seat belt use.  
10

11  
12 162  
13  
14 163 The quality assessment of studies was independently evaluated by two reviewers (JR and CAP) using  
15  
16 164 the Newcastle-Ottawa Scale (23). This scale includes 8 items, 4 items about selection criteria of cases  
17  
18 165 or cohorts in case-control or cohort designs, respectively; 2 items about comparability between groups  
19  
20 166 (in both designs); and 3 items about exposure criteria in case-control designs and about outcomes in  
21  
22 167 cohort designs. Any of those studies could be awarded a maximum of one star for each numbered item  
23  
24 168 within the selection and exposure categories. A maximum of two stars could be given for comparability.  
25  
26 169 For the incidence analysis, we considered six aspects (24): 1) representativeness of cohort; 2) design;  
27  
28 170 3) method of sampling; 4) adequacy of follow-up; 5) if the outcomes were adequately ascertained and  
29  
30 171 4) if measurement or misclassification bias were minimized. Studies without these features or with  
31  
32 172 unclear reporting were classified to have a high risk of bias.  
33

### 34 173 *Patient and Public Involvement*

35  
36  
37 174 "No patient involved"

### 38 39 175 *Data synthesis*

40  
41 176 We undertook random-effects meta-analysis to determine the odds ratios (OR) with 95% confidence  
42  
43 177 intervals (CI) for maternal and offspring complications from MVC. We estimated heterogeneity  
44  
45 178 between the included studies with Chi-Square test of Q (I<sup>2</sup>) excepting when not enough studies were in  
46  
47 179 the meta-analysis (2-3), and we pooled the rates of maternal/fetal complications and reported with 95%  
48  
49 180 CI. For each primary outcome, a meta-analysis was conducted for studies sufficiently homogeneous in  
50  
51 181 terms of the characteristics of participants and exposure. The subgroup analysis was applied in: a)  
52  
53 182 trimester of pregnancy during which the trauma occurred; b) maternal risk status (low, high, any risk);  
54  
55 183 c) type of trauma; d) severity of trauma (using the ISS to categorize the severity of trauma sustained  
56  
57 184 following MVC) (25); e) setting (low and middle income, high-income country); f) year of study  
58  
59  
60

185 publication: (before or after the introduction of mandatory seatbelt legislature in the country of study);  
186 and g) study quality according to the Newcastle and Ottawa Scale (23).

187

## 188 **Results**

### 189 *Study selection*

190 Out of 1,739 retrieved references, 19 studies met the eligibility criteria (Figure 1). Five of these reported  
191 data allowing us to compare pregnancy complications between pregnant women involved in MVC and  
192 those not involved in MVC (6, 26-29). The totality of the studies (n = 19) contributed to the analysis of  
193 the incidence of pregnancy complications among women involved in MVC (6, 17, 26-42).

194

### 195 *Characteristics of included studies*

196 The characteristics of included studies are in Table 1. Included studies were published between 1993  
197 and 2016. Most of them were carried out in developed, high-income countries such as USA (14/18) (26,  
198 28-31, 33-41), Sweden (1/19) (27), Kuwait (1/19) (17) and Israel (1/19) (42). The number of included  
199 pregnant women varies, ranging from 39 to 1,094,559. The data was sourced from hospital  
200 records/trauma registries (7/19) (17, 31, 32, 35, 38, 39, 42) or from population-level databases (12/19)  
201 (6, 26-30, 33, 34, 36, 37, 40, 41). The majority of studies collected information on outcomes of pregnant  
202 women involved in MVC during any trimester of pregnancy. 8 out of 19 studies reported information  
203 about the use of safety devices such as seatbelts and/or airbag (26, 29, 30, 33, 35, 37-39). Also in eight  
204 studies, the authors assessed the severity of MVC injuries with five of these using a validated tool (28,  
205 31, 35, 38, 42) – most of them reporting ISS (28, 31, 35, 42) and one the Revised Trauma Scale (38) .

206

### 207 *Quality assessment*

208 60% of studies had a low risk of bias with regards to the adequacy of representativeness and random  
209 sample selection (12/19). None of the studies was prospective. The categories of follow up of more than  
210 80% of participants, outcome ascertainment and misclassification bias showed low risk (Figure 2). The  
211 five papers included for comparison of complication rates between pregnant women exposed to MVC  
212 and those who were not exposed (assessed using the Newcastle-Ottawa Scale) showed generally high



1  
2  
3 213 quality, with four papers scoring 9/9 (6, 26, 28, 29). The remaining paper scored 8/9, losing one point  
4  
5 214 for the comparability as it did not control for any secondary factors (27).  
6

7 215  
8

9 216 *Incidence of complications among pregnant women involved in motor vehicle crashes*

11 217 The assessment of adverse outcome incidence among women involved in MVC (using population-level  
12  
13 218 data) demonstrated incidence estimations of 276.43 per 1000 for induction of labour (95% CI 262.54  
14  
15 219 to 290.54), 191.90 per 1000 for preterm delivery (95% CI 45.98 to 405.74), and 166.65 per 1000 for  
16  
17 220 caesarean section (95% CI 47.34 to 339.00). The estimated incidence rates for other complications  
18  
19 221 included 42.33 per 1000 for PROM, 17.08 per 1000 requiring admission to hospital, 16.14 per 1000 for  
20  
21 222 placental abruption and 15.19 per 1000 for neonatal respiratory distress. A pooled incidence of maternal  
22  
23 223 death was 3.60 per 1000 women (95% CI 0.25 to 10.42, 3 studies, 12,000 women, Tau=1.77). The  
24  
25 224 pooled incidence of perinatal death (fetal death or stillbirth) per 1000 women was 6.60, (95% CI 3.81  
26  
27 225 to 10.12; 8 studies, 47,992 women;  $I^2=92.6\%$ ) (Table 2). The representation of the maternal and  
28  
29 226 offspring outcomes according to trauma severity are in appendices (Appendices 3 and 4). Using data  
30  
31 227 from single hospital centres, the random pooled estimation for the incidence of admission to hospital  
32  
33 228 was 117.92 per 1000 women (95% CI 109.82 to 126.40) (17, 38); for maternal death was 135.05 per  
34  
35 229 1000 women (95% CI 131.37 to 138.80) and for fetal death was 5.73 per 1000 women (95% CI 3.05 to  
36  
37 230 9.77) (Appendices 5 and 6).  
38  
39  
40

41 231

42 232 *Pregnancy complications in women involved vs not involved in motor vehicle crashes*

44 233 We observed a statistically significant link between involvement in MVC and maternal death (OR  
45  
46 234 202.3, 95% CI 110.60 to 370.00; single study) (27) (data not shown in table or graphic). Figure 3 shows  
47  
48 235 pooled results from population-level data, demonstrating a positive association between MVC and  
49  
50 236 placental abruption (OR 1.43 95% CI 1.27 to 1.63). Two studies contributed data used in sensitivity  
51  
52 237 analyses stratifying by seatbelt use, where the pooled estimation (26, 29) of fetal death decreased with  
53  
54 238 seatbelt devices, but the association was not statistically significant (OR 0.66 95% CI 0.36 to 1.19)  
55  
56 239 (Figure 1, supplementary). The review manager forest plot displays a positive but not statistically  
57  
58  
59  
60

1  
2  
3 240 significant association between fetal death and MVC without seatbelt use (OR 5.78 95% CI 0.17 to  
4  
5 241 201.12,  $Tau^2 = 6.51$ ) (Figure 2, supplementary).  
6

7 242  
8

## 9 243 **Discussion**

### 10 244 *Statement of principal findings*

11  
12  
13 245 This review estimated that for women involved in MVC, maternal death occurrence was 3.6 per 1000  
14  
15 246 and perinatal death 6.6 per 1000 women. Compared to women not involved in MVC, those involved  
16  
17 247 had an increased odds of placental abruption, antepartum haemorrhage and maternal death. The pooled  
18  
19 248 incidence of complications per 1,000 women involved in MVC was, from the higher incidence to the  
20  
21 249 lower, induction of labour, preterm delivery, caesarean section, premature rupture of membrane, and  
22  
23 250 placental abruption (population level-data).  
24  
25

26 251

### 27 252 *Strengths and weaknesses of this study*

28  
29  
30 253 This is the second systematic review, after the one of Mendez Figueroa et al., in 2013 (4), looking at  
31  
32 254 outcomes following MVC in pregnancy. We conducted our review using a prospectively registered  
33  
34 255 protocol (PROSPERO) and reported it in accordance with the international standards (43). This review,  
35  
36 256 to our best knowledge, is the first one examining the link between involvement in MVC, mortality and  
37  
38 257 adverse outcomes that involves evaluation of study quality assessment; 14 studies looking at outcome  
39  
40 258 incidence related to MVC (17, 30-42) and 5 studies comparing outcomes in pregnant women involved  
41  
42 259 in MVC and those who were not (6, 26-29). We used established tools to assess outcome reporting  
43  
44 260 quality for the incidence rates (44) and comparability (45). We included data from population-level and  
45  
46 261 single centre studies, but the analysis and reporting of the results were independent in order to get  
47  
48 262 precision and validity in the estimations. However, a couple of graphics of the maternal and offspring's  
49  
50 263 outcomes incidences have been included as Appendix 3 and 4. Between August 2018 and March 2020,  
51  
52 264 there have been no new studies eligible to include in the systematic review.  
53  
54

55 265

56  
57  
58 266 For the incidence analysis, we evaluated the quality of the 19 studies of this systematic review. The  
59  
60 267 highest risk was in the design. None of the studies had a prospective design. The representativeness of

1  
2  
3 268 cohort and the random method of sampling were other limitations of the quality of studies, with 7 out  
4  
5 269 of 19 studies having a high risk of bias in these areas (17, 31, 32, 35, 38, 39, 42). However, the quality  
6  
7 270 assessment of the five papers included for comparison of complication rates between pregnant women  
8  
9 271 involved and not involved in MVC using the Newcastle-Ottawa Scale showed generally high quality,  
10  
11 272 with four papers scoring 9/9 (6, 26, 28, 29).  
12

13  
14 273

15 274 The weaknesses of this systematic review are as follows. Firstly, outcomes were not reported by  
16  
17 275 trimester, with 13 out of 19 papers focused on MVC at any trimester. Secondly, outcomes, according  
18  
19 276 to seatbelt use, are scarce as only two studies using population-level data looked at safety features as a  
20  
21 277 stratification factor (26, 29). Two studies with data sourced from hospital records/single-site trauma  
22  
23 278 registries (38, 39) and three studies utilising population-level databases (26, 29, 30) reported some  
24  
25 279 outcomes regarding seatbelt-use. Thirdly, we found a limited number of relevant studies comparing  
26  
27 280 outcomes between women involved and not involved in MVC. The majority of the studies were  
28  
29 281 carried out in the USA (26, 28, 29) with most recent one published in 2013 (29). Fourthly, the  
30  
31 282 included studies differed in study design with seven of them using hospital records/single-site trauma  
32  
33 283 registry (17, 31, 32, 35, 38, 39, 42) and twelve population database (6, 26-30, 33, 34, 36, 37, 40, 41).  
34  
35 284 Despite analysing the data within the respective study designs and incorporation of anticipated  
36  
37 285 variation into the statistical model (random-effects) (46), we encountered substantial statistical  
38  
39 286 heterogeneity in the pooled estimates that could not be formally explored due to a limited number of  
40  
41 287 studies and poor reporting of important factors such as trauma severity. As a fifth point, these data  
42  
43 288 apply to developed countries - only one of the papers included data from an underdeveloped country,  
44  
45 289 perhaps influencing the outcomes that might otherwise be seen in the developed world. Finally, in  
46  
47 290 only eight studies did authors assess severity of MVC injuries, with only five of these using a  
48  
49 291 validated tool (28, 31, 35, 38, 42). This was a challenge when aiming to analyse results according to  
50  
51 292 the severity of the crash.  
52  
53  
54  
55

56 293

57  
58 294 *Meaning of the study*  
59  
60

1  
2  
3 295 The strongest association was found between placental abruption (6, 28, 29) and MVC. Maternal death  
4  
5 296 was associated with involvement in MVC but this finding needs to be treated with caution as the data  
6  
7 297 come from a single study (27). The outcomes in descending order of incidence estimate per 1000  
8  
9 298 (population-level data) were the induction of labour, preterm delivery, caesarean section, premature  
10  
11 299 rupture of membranes, and admission to hospital, placental abruption and maternal death. In the  
12  
13 300 analyses stratified by use of seatbelt, we observed an association of fetal death with lack of seatbelt use  
14  
15 301 by pregnant women involved in an MVC. However, this finding was not statistically significant and  
16  
17 302 informed by a limited number of studies. Previous studies have shown that pregnant women wearing  
18  
19 303 seatbelt during the MVC did not experience a significantly higher risk of adverse fetal outcomes than  
20  
21 304 women who were not involved in MVC (47) Furthermore, airbags seem to be contributing to the  
22  
23 305 protection of both pregnant drivers and their fetuses (48).

26 306 The results of this systematic review provide evidence informing primary prevention measures,  
27  
28 307 recommendations and educational interventions for pregnant women in the context of MVC that should  
29  
30 308 be incorporated into the primary care guidelines.

32 309

### 35 310 *Unanswered questions and future research*

37 311 The effects of MVC in pregnant women is a specific field that requires further research and an improved  
38  
39 312 methodological approach to determine the risks of adverse maternal and fetal outcomes.

41 313 Additional variables such as trauma severity, the position of the women in the car, use of seatbelt,  
42  
43 314 deployment or non-deployment of an airbag, severity of the crash and gestational week of pregnancy  
44  
45 315 should be recorded in relation to MVC exposure in order to allow more precision when analysing  
46  
47 316 outcomes. A greater number of well-designed studies in a variety of global settings would strengthen  
48  
49 317 current evidence-base.

51 318

### 54 319 *Conclusions*

56 320 Pregnant women involved in MVC seem to be at increased risk of maternal death and complications,  
57  
58 321 especially placental abruption, than those not involved in MVC. The risk of complications such as  
59  
60 322 preterm delivery, premature rupture of membranes and caesarean section were also increased. However,

1  
2  
3 323 these findings need to be treated with caution due to the small number of studies included in the review  
4  
5 324 and considerable differences between studies. Road traffic authorities should be conscious and strict in  
6  
7 325 targeting preventive measures aimed at pregnant users of motor vehicles due to risk associated with  
8  
9 326 potential involvement in MVC.  
10

11 327

12  
13 328 **Word count:** 3,147  
14

15 329

### 16 17 330 **Author's contribution**

18  
19 331 PM conducted literature searches and screened publications jointly with JR. CAP and JR extracted the  
20  
21 332 data. CAP and ER drafted the manuscript and conducted the statistical analyses. KSK and ST designed  
22  
23 333 the study review. CAP is the guarantor. Authors VMR, KB, ABC, ST and KSK gave critical revision  
24  
25 334 of the manuscript. All authors had full access to the data and take responsibility for the data analyses.  
26  
27 335 The corresponding author attests that all listed authors meet authorship criteria.  
28  
29

30 336

### 31 337 **Acknowledgement**

32  
33 338 Professor Khalid S. Khan is distinguished investigator at the University of Granada through a Beatriz  
34  
35 339 Galindo (Senior Modality) Program grant of the Spanish Ministry of Science, Innovation and  
36  
37 340 Universities.  
38  
39

40 341

### 41 42 342 **Data sharing Statement**

43  
44 343 All data relevant to the study are included in the article or uploaded as supplementary information  
45  
46  
47  
48  
49  
50  
51  
52  
53  
54  
55  
56  
57  
58  
59  
60

Table 1. Characteristics of included studies

| Study ID<br>Author, year,<br>Country         | Design                                                                            | Sample<br>size                        | Time<br>period | Inclusion criteria                                                             | Data source                                                                    | Trimester       | Seatbelt<br>use<br>(with data) | Assessment<br>of trauma<br>severity<br>(with data) | Method of<br>assessing<br>trauma<br>severity  | Maternal<br>outcomes                                                           | Offspring<br>outcomes                                              |
|----------------------------------------------|-----------------------------------------------------------------------------------|---------------------------------------|----------------|--------------------------------------------------------------------------------|--------------------------------------------------------------------------------|-----------------|--------------------------------|----------------------------------------------------|-----------------------------------------------|--------------------------------------------------------------------------------|--------------------------------------------------------------------|
| <b>Population-level data</b>                 |                                                                                   |                                       |                |                                                                                |                                                                                |                 |                                |                                                    |                                               |                                                                                |                                                                    |
| <b>Azar, 2005</b><br>USA                     | population-based<br>matched<br>retrospective<br>cohort<br><i>(incidence only)</i> | 5936                                  | 2003-<br>2011  | Admitted to<br>hospital<br>following MVC<br>while pregnant                     | Population-based<br>cohort                                                     | any             | no                             | no                                                 | N/A                                           | Maternal death                                                                 | -----                                                              |
| <b>Hyde, 2003</b><br>USA                     | retrospective<br>cohort<br><i>(incidence and<br/>comparison)</i>                  | 322704                                | 1992-<br>1999  | Pregnant<br>drivers involved<br>in MVC                                         | Linked databases<br>(police registry &<br>birth/death<br>certificates)         | any             | yes                            | yes                                                | Study-<br>specific<br>definition <sup>1</sup> | -----                                                                          | Fetal death                                                        |
| <b>Kvarnstrand,<br/>2008</b><br>Sweden       | retrospective<br>cohort <i>(incidence<br/>and comparison)</i>                     | 1094559                               | 1991-<br>2001  | Maternal<br>inclusion on<br>the accident<br>register > 28 GW                   | Linked databases<br>(police registry &<br>birth/death<br>certificates)         | 2 <sup>nd</sup> | no                             | yes                                                | Study<br>specific<br>definition <sup>2</sup>  | Maternal death                                                                 | Fetal/neonatal<br>death                                            |
| <b>Kuo, 2007</b><br>USA                      | retrospective<br>chart/database<br>review <i>(incidence<br/>only)</i>             | 16982<br>injuries<br>4479 (in<br>MVC) | 2002           | Pregnant women<br>hospitalized with<br>injury (only MVC<br>used)               | Sample from<br>population level<br>cohort (National<br>Inpatient Sample)       | any             | no                             | no                                                 | N/A                                           | Delivery,<br>hospitalization                                                   | -----                                                              |
| <b>Schiff, 2005</b><br>USA                   | retrospective<br>cohort<br><i>(incidence and<br/>comparison)</i>                  | 17899                                 | 1989-<br>2001  | Hospitalized for<br>MVC and with<br>a singleton<br>livebirth or<br>fetal death | Linked databases<br>(hospital discharge<br>data & birth/death<br>certificates) | any             | no                             | yes                                                | ISS                                           | Preterm birth,<br>PROM,<br>C-section,<br>placental<br>abruption                | Stillbirth,<br>LBW, SGA,<br>Fetal distress,<br>RDS,<br>Meconium    |
| <b>Schiff, 2010</b><br>USA                   | retrospective<br>cohort <i>(incidence<br/>only)</i>                               | 3348                                  | 2002-<br>2005  | Non-rollover<br>MVC among<br>pregnant<br>front seat<br>occupants               | Linked databases<br>(hospital discharge<br>data & birth/death<br>certificates) | any             | yes (airbag)<br>no (seatbelt)  | no                                                 | N/A                                           | Preterm birth,<br>placental<br>abruption, labour<br>induction, C-<br>section   | Stillbirth,<br>LBW<br>SGA, RDS<br>Fetal distress<br>Meconium       |
| <b>Vivian-<br/>Taylor, 2012</b><br>Australia | retrospective<br>cohort<br><i>(incidence and<br/>comparison)</i>                  | 604380                                | 2000-<br>2007  | Women who gave<br>birth exposed and<br>not exposed to<br>MVC                   | Linked databases<br>(hospital discharge<br>data & birth/death<br>certificates) | 2 <sup>nd</sup> | no                             | yes                                                | Study-<br>specific<br>definition <sup>3</sup> | Admission,<br>placental<br>abruption, APH,<br>PPH, preterm<br>birth, C-section | Perinatal<br>death (>20 <sup>th</sup><br>GW), neonatal<br>transfer |

|                                                |                                                                                  |        |           |                                                                                   |                                                                       |                                   |                                |     |             |                                               |                                   |
|------------------------------------------------|----------------------------------------------------------------------------------|--------|-----------|-----------------------------------------------------------------------------------|-----------------------------------------------------------------------|-----------------------------------|--------------------------------|-----|-------------|-----------------------------------------------|-----------------------------------|
| <b>Vladutiu, 2013</b><br>USA                   | retrospective cohort<br>( <i>incidence and comparison</i> )                      | 878546 | 2001-2008 | Pregnant women 16-46 years, > 20GW, delivering a live/stillbirth singleton infant | Linked databases (police registry & birth/death certificates)         | 2 <sup>nd</sup>                   | yes (seatbelt)<br>yes (airbag) | no  | N/A         | Placental abruption, PROM, preterm birth      | Stillbirth                        |
| <b>Weiss, 2002</b><br>USA                      | crash database pregnant vs. non-pregnant (NASS/CDS)<br>( <i>incidence only</i> ) | 32810  | 1995-1999 | Pregnant and non-pregnant women 15-39 years                                       | Sample from population-level database of traffic accidents            | any                               | yes                            | no  | N/A         | Maternal death                                | -----                             |
| <b>Weiss, 2008</b><br>USA                      | retrospective cohort<br>( <i>incidence only</i> )                                | 1816   | 1999-2002 | Injury-related emergency department visits by pregnant women (only MVC used)      | Linked databases (hospital discharge data & birth/death certificates) | any                               | no                             | no  | N/A         | Hospital admission                            | -----                             |
| <b>Whitehead, 2013*</b><br>USA                 | PRAMS survey database<br>( <i>incidence only</i> )                               | 235329 | 2000-2005 | Survey of women who recently delivered a live-born infant                         | Population-based cohort (PRAMS)                                       | any                               | no                             | no  | N/A         | Preterm birth, UTI, PROM                      | -----                             |
| <b>Wolf, 1993</b><br>USA                       | population-based retrospective cohort<br>( <i>incidence only</i> )               | 2582   | 1980-1988 | Pregnant women drivers involved in MVC >20GW                                      | Linked databases (police registry & birth/death certificates)         | 2 <sup>nd</sup> & 3 <sup>rd</sup> | yes                            | no  | N/A         | Preterm birth, placental abruption, C-section | Stillbirth, LBW, RDS              |
| <b>Single hospital records/trauma registry</b> |                                                                                  |        |           |                                                                                   |                                                                       |                                   |                                |     |             |                                               |                                   |
| <b>Aboutanos, 2007</b><br>USA                  | retrospective chart/database review<br>( <i>incidence only</i> )                 | 148    | 2001-2005 | Pregnant women presenting to ED following MVC                                     | Single hospital records from trauma centre                            | any                               | yes (only in miscarriage)      | yes | ISS         | Maternal death, miscarriage                   | Fetal death<br>hydrops<br>fetalis |
| <b>Baerga-Varela, 2000</b><br>USA              | retrospective chart/database review<br>( <i>incidence only</i> )                 | 39     | 1986-1996 | Admitted to hospital after MVC while pregnant                                     | Single hospital records                                               | any                               | no                             | yes | ISS         | Maternal death, miscarriage                   | Stillbirth                        |
| <b>Brookfield, 2013</b><br>USA                 | retrospective chart/database review<br>( <i>incidence only</i> )                 | 256    | 1990-2007 | Pregnant women presenting to ED following MVC                                     | Single hospital records from trauma centre                            | any                               | yes                            | yes | ISS and RTS | Maternal death, admission to hospital         | -----                             |

|                                |                                                                |      |           |                                                                        |                                 |                                   |     |    |     |                                                                                           |                                                  |
|--------------------------------|----------------------------------------------------------------|------|-----------|------------------------------------------------------------------------|---------------------------------|-----------------------------------|-----|----|-----|-------------------------------------------------------------------------------------------|--------------------------------------------------|
| <b>Chibber, 2015</b><br>Kuwait | retrospective chart/database review<br><i>(incidence only)</i> | 728  | 2009-2012 | MVC, pregnant, treated at major tertiary hospitals                     | Single hospital records         | 2 <sup>nd</sup>                   | no  | no | N/A | Maternal death, placental abruption, preterm birth, uterine rupture, C-Section, admission | Fetal death, fetal distress                      |
| <b>Luley, 2013</b><br>USA      | retrospective chart/database review<br><i>(incidence only)</i> | 126  | 1994-2010 | Pregnant women after an MVC >14/40 GA                                  | Single hospital trauma database | 2 <sup>nd</sup> & 3 <sup>rd</sup> | yes | no | N/A | Maternal death, placental abruption, C-section                                            | Stillbirth                                       |
| <b>Miller, 2016</b><br>Israel  | retrospective cohort<br><i>(incidence only)</i>                | 3794 | 2006-2013 | Women 18-40 years, in MVC and hospitalized (only pregnant cohort used) | National trauma registry        | any                               | no  | no | ISS | Maternal death, miscarriage, placental abruption, C-section                               | Stillbirth                                       |
| <b>Orji, 2002</b><br>Nigeria   | retrospective chart/database review<br><i>(incidence only)</i> | 84   | 1980-2000 | Pregnant women in MVC managed in tertiary hospitals                    | Single hospital records**       | any                               | no  | no | N/A | Maternal death, placental abruption, uterine rupture, C-section                           | Perinatal death (fetal death), fetal tachycardia |

ISS: Injury Severity Score; RTS: Revised Trauma Score; ICU: Intensive Care Unit, N/A not applicable; GA: Gestational Age; LBW: Low birth weight; SGA: Small for gestational age; RDS: Respiratory distress syndrome. \*National survey; \*\*Two hospitals in same region included; <sup>1</sup>Possible/probable/incapacitated/fatal; <sup>2</sup>Fatal/major/minor/uninjured; <sup>3</sup>'Severe' = admission to ICU and/or blood transfusion and/or injury to abdomen/pelvis/lower back.



Table 2. Incidence of adverse outcomes per 1,000 women involved in motor vehicle crashes.

| Outcome and study            | Number of studies | Number of women | Incidence estimate per 1,000 women | 95% CI                    |
|------------------------------|-------------------|-----------------|------------------------------------|---------------------------|
| <b>Maternal</b>              |                   |                 |                                    |                           |
| <b>Maternal death</b>        | <b>3</b>          | <b>12000</b>    | <b>3.60</b>                        | <b>(0.25 to 10.42)</b>    |
| Azar, 2005                   |                   |                 | 6.57                               | (4.68 to 8.97)            |
| Kvarnstrand, 2008            |                   |                 | 6.61                               | (3.70 to 10.88)           |
| Miller, 2016                 |                   |                 | 0.26                               | (0.01 to 1.47)            |
| <b>Admission to hospital</b> | <b>2</b>          | <b>3838</b>     | <b>17.08</b>                       | <b>(13.20 to 21.46)</b>   |
| Vivian-Taylor, 2012          |                   |                 | 8.90                               | (5.28 to 14.03)           |
| Weiss, 2008                  |                   |                 | 29.19                              | (21.94 to 38.0)           |
| <b>Placenta abruption</b>    | <b>6</b>          | <b>36737</b>    | <b>16.14</b>                       | <b>(7.04 to 28.78)</b>    |
| Wolf, 1993                   |                   |                 | 8.10                               | (5.02 to 12.36)           |
| Miller, 2016                 |                   |                 | 1.05                               | (0.29 to 2.70)            |
| Schiff, 2005                 |                   |                 | 113.40                             | (88.80 to 142.01)         |
| Schiff, 2010                 |                   |                 | 12.25                              | (8.80 to 16.58)           |
| Vivian-Taylor, 2012          |                   |                 | 16.32                              | (11.26 to 22.84)          |
| Vladutiu, 2013               |                   |                 | 7.17                               | (6.15 to 8.31)            |
| <b>Preterm delivery</b>      | <b>5</b>          | <b>265680</b>   | <b>191.90</b>                      | <b>(45.98 to 405.74)</b>  |
| Schiff, 2005                 |                   |                 | 316.15                             | (278.53 to 355.65)        |
| Schiff, 2010                 |                   |                 | 97.37                              | (87.53 to 107.92)         |
| Vivian-Taylor, 2012          |                   |                 | 83.09                              | (71.42 to 95.98)          |
| Vladutiu, 2013               |                   |                 | 110.33                             | (106.43 to 114.33)        |
| Whitehead, 2013              |                   |                 | 437.00                             | (435.00 to 439.01)        |
| <b>PROM</b>                  | <b>3</b>          | <b>260310</b>   | <b>42.33</b>                       | <b>(5.87 to 109.24)</b>   |
| Schiff, 2005                 |                   |                 | 22.34                              | (11.95 to 37.89)          |
| Vladutiu, 2013               |                   |                 | 23.53                              | (21.66 to 25.51)          |
| Whitehead, 2013              |                   |                 | 96.00                              | (94.81 to 97.20)          |
| <b>Labour induction</b>      | <b>2</b>          | <b>3930</b>     | <b>276.43</b>                      | <b>(262.54 to 290.54)</b> |

|                             |                |              |               |                          |
|-----------------------------|----------------|--------------|---------------|--------------------------|
| Schiff, 2005                |                |              | 223.37        | (190.15 to 259.42)       |
| Schiff, 2010                |                |              | 286.14        | (270.87 to 301.78)       |
| <b>Caesarean section</b>    | <b>5</b>       | <b>12338</b> | <b>166.65</b> | <b>(47.34 to 339.00)</b> |
| Miller, 2016                |                |              | 6.06          | (3.85 to 9.08)           |
| Schiff, 2005                |                |              | 254.30        | (219.38 to 291.73)       |
| Schiff, 2010                |                |              | 259.26        | (244.48 to 274.46)       |
| Vivian-Taylor, 2012         |                |              | 260.14        | (241.13 to 279.85)       |
| Wolf, 1993                  |                |              | 171.68        | (157.35 to 186.76)       |
| <b>Offspring</b>            |                |              |               |                          |
| <b>Perinatal death</b>      | <b>8</b>       | <b>47992</b> | <b>6.60</b>   | <b>(3.81 to 10.12)</b>   |
| Kvarnstrand, 2008           | fetal/neonatal |              | 17.62         | (12.62 to 23.92)         |
| Hyde, 2003                  | fetal          |              | 5.01          | (3.66 to 6.70)           |
| Miller, 2016                | stillbirth     |              | 0.79          | (0.16 to 2.31)           |
| Schiff, 2005                | fetal          |              | 12.03         | (4.85 to 24.62)          |
| Vivian-Taylor, 2012         | stillbirth     |              | 16.82         | (11.67 to 23.42)         |
| Vladutiu, 2013              | stillbirth     |              | 5.25          | (4.38 to 6.23)           |
| Schiff, 2010                | fetal          |              | 4.18          | (2.29 to 7.01)           |
| Wolf, 1993                  | fetal          |              | 3.47          | (1.59 to 6.58)           |
| <b>Fetal distress</b>       | <b>2</b>       | <b>3930</b>  | <b>60.09</b>  | <b>(52.85 to 67.77)</b>  |
| Schiff, 2005                |                |              | 132.30        | (105.84 to 162.56)       |
| Schiff, 2010                |                |              | 50.48         | (43.31 to 58.44)         |
| <b>Meconium at delivery</b> | <b>2</b>       | <b>3930</b>  | <b>52.61</b>  | <b>(45.82 to 59.85)</b>  |
| Schiff, 2005                |                |              | 63.57         | (45.15 to 86.57)         |
| Schiff, 2010                |                |              | 51.08         | (43.86 to 59.08)         |
| <b>RDS</b>                  | <b>3</b>       | <b>6522</b>  | <b>15.19</b>  | <b>(5.83 to 28.68)</b>   |
| Schiff, 2005                |                |              | 32.65         | (19.77 to 50.51)         |
| Schiff, 2010                |                |              | 14.64         | (10.85 to 19.30)         |
| Wolf, 1993                  |                |              | 6.17          | (3.53 to 10.00)          |

**Data source: population database; CI, Confidence Interval; PROM: Premature Rupture of Membranes; RDS: Respiratory Distress Syndrome.**

## Figures

Figure 1. The study selection process in the systematic review of outcomes on pregnant women involved in motor vehicle crashes

Figure 2. The quality assessment of the included studies

Figure 3. Comparison of outcomes between women involved and not involved in motor vehicle crashes

Figure 1. (Supplementary). Comparison of pregnancy complications between women involved and not involved in motor vehicle crashes stratified by seatbelt use

Figure 2. (Supplementary). Comparison of fetal death between women involved and not involved in motor vehicle crashes stratified by seatbelt use

## References

1. Sivak M. Female drivers in the United States, 1963-2010: from a minority to a majority? *Traffic Inj Prev*. 2013;14(3):259-60.
2. Azar T, Longo C, Oddy L, Abenhaim HA. Motor vehicle collision-related accidents in pregnancy. *Journal of Obstetrics and Gynaecology Research*. 2015;41(9):1370-6.
3. Weiss HB, Songer TJ, Fabio A. Fetal deaths related to maternal injury. *Jama-Journal of the American Medical Association*. 2001;286(15):1863-8.
4. Mendez-Figueroa H, Dahlke JD, Vrees RA, Rouse DJ. Trauma in pregnancy: an updated systematic review. *Am J Obstet Gynecol*. 2013;209(1):1-10.
5. Redelmeier DA, May SC, Thiruchelvam D, Barrett JF. Pregnancy and the Risk of a Traffic Crash. *Canadian Medical Association Journal*. 2014;186(10):pp 742-50.
6. Vivian-Taylor J, Roberts CL, Chen JS, Ford JB. Motor vehicle accidents during pregnancy: a population-based study. *Bjog-an International Journal of Obstetrics and Gynaecology*. 2012;119(4):499-503.
7. Battaloglu E, McDonnell D, Chu J, Lecky F, Porter K. Epidemiology and outcomes of pregnancy and obstetric complications in trauma in the United Kingdom. *Injury*. 2016;47(1):184-7.
8. Vladutiu CJ, Marshall SW, Poole C, Casteel C, Menard MK, Weiss HB. Adverse pregnancy outcomes following motor vehicle crashes. *Am J Prev Med*. 2013;45(5):629-36.
9. Manoogian S. Comparison of pregnant and non-pregnant occupant crash and injury characteristics based on national crash data. *Accident Analysis & Prevention*. 2015;74:pp 69-76.
10. Service NH. Car travel in pregnancy [Available from: <https://www.nhs.uk/conditions/pregnancy-and-baby/travel-pregnant/-car-travel-in-pregnancy>.
11. Trust NC. Safety Guidelines on travelling by car during pregnancy UK [Available from: <https://www.nct.org.uk>.
12. Gynecologist ACoOa. Car safety for pregnant women, babies and children. 2016.
13. Deshpande NA, Kucirka LM, Smith RN, Oxford CM. Pregnant trauma victims experience nearly 2-fold higher mortality compared to their nonpregnant counterparts. *American Journal of Obstetrics & Gynecology*. 2017;217(5):590.e1-.e9.
14. Schuster M, Becker N, Young A, Paglia MJ, Mackeen AD. Trauma in pregnancy: A review of the Pennsylvania Trauma Systems Foundation database. *Trauma (United Kingdom)*. 2018;20(1):30-7.
15. Gibbins KJ, Silver RM. Trauma/motor vehicle crashes and stillbirth. *American Journal of Obstetrics and Gynecology*. 2017;216 (1 Supplement 1):S552-S3.
16. Lien C, Ali A, Culhane J. Blunt abdominal trauma with uterine rupture and fetal demise. *Trauma (United Kingdom)*. 2017;19(3):219-21.
17. Chibber R, Al-Harmi J, Fouda M, El-Saleh E. Motor-vehicle injury in pregnancy and subsequent feto-maternal outcomes: Of grave concern. *Journal of Maternal-Fetal and Neonatal Medicine*. 2015;28(4):399-402.
18. Brown S, Mozurkewich E. Trauma during pregnancy. *Obstetrics and gynecology clinics of North America*. 2013;40(1):47-57.
19. Einav S, Sela HY, Weiniger CF. Management and outcomes of trauma during pregnancy. *Anesthesiology clinics*. 2013;31(1):141-56.
20. Mirza FG, Devine PC, Gaddipati S. Trauma in pregnancy: a systematic approach. *Am J Perinatol*. 2010;27(7):579-86.
21. Smith KA, Bryce S. Trauma in the pregnant patient: an evidence-based approach to management. *Emergency medicine practice*. 2013;15(4):1-18; quiz -9.
22. Moher D, Liberati A, Tetzlaff J, Altman DG. Preferred reporting items for systematic reviews and meta-analyses: the PRISMA statement. *Bmj*. 2009;339:b2535.
23. Lo CK-L, Mertz D, Loeb M. Newcastle-Ottawa Scale: comparing reviewers' to authors' assessments. *BMC Medical Research Methodology*. 2014;14(1):45.

24. Cheong-See F, Schuit E, Arroyo-Manzano D, Khalil A, Barrett J, Joseph KS, et al. Prospective risk of stillbirth and neonatal complications in twin pregnancies: systematic review and meta-analysis. *Bmj*. 2016;354:i4353.
25. Deng Q, Tang B, Xue C, Liu Y, Liu X, Lv Y, et al. Comparison of the Ability to Predict Mortality between the Injury Severity Score and the New Injury Severity Score: A Meta-Analysis. *Int J Environ Res Public Health*. 2016;13(8).
26. Hyde LK, Cook LJ, Olson LM, Weiss HB, Dean JM. Effect of motor vehicle crashes on adverse fetal outcomes. *Obstetrics & Gynecology*. 2003;102(2):279-86.
27. Kvarnstrand L, Milsom I, Lekander T, Druid H, Jacobsson B. Maternal Fatalities, Fetal and Neonatal Deaths Related to Motor Vehicle Crashes During Pregnancy: A National Population-Based Study. *Acta Obstetrica et Gynecologica Scandinavica*. 2008;87(9):9 p.
28. Schiff MA, Holt VL. Pregnancy outcomes following hospitalization for motor vehicle crashes in Washington State from 1989 to 2001.[Erratum appears in *Am J Epidemiol*. 2005 Jul 15;162(2):197]. *American Journal of Epidemiology*. 2005;161(6):503-10.
29. Vladutiu CJ, Marshall SW, Poole C, Casteel C, Menard MK, Weiss HB. Adverse Pregnancy Outcomes Following Motor Vehicle Crashes. *American Journal of Preventive Medicine*. 2013;45(5):629-36.
30. Wolf ME, Alexander BH, Rivara FP, Hickok DE, Maier RV, Starzyk PM. A retrospective cohort study of seat-belt use and pregnancy outcome after a motor-vehicle crash. *Journal of Trauma-Injury Infection and Critical Care*. 1993;34(1):116-9.
31. Baerga-Varela Y, Zietlow SP, Bannon MP, Harmsen WS, Ilstrup DM. Trauma in pregnancy. *Mayo Clinic Proceedings*. 2000;75(12):1243-8.
32. Orji EO, Fadiora SO, Ogunlola IO, Badru OS. Road traffic accidents in pregnancy in Southwest Nigeria: A 21-year review. *Journal of Obstetrics and Gynaecology*. 2002;22(5):516-8.
33. Weiss HB, Strotmeyer S, Group BMJP. Characteristics of pregnant women in motor vehicle crashes. *Injury Prevention*. 2002;8(3):p. 207-10.
34. Kuo C, Jamieson DJ, McPheeters ML, Meikle SF, Posner SF. Injury hospitalizations of pregnant women in the United States, 2002. *Am J Obstet Gynecol*. 2007;196(2):161.e1-6.
35. Aboutanos MB, Aboutanos SZ, Dompkowski D, Duane TM, Malhotra AK, Ivatury RR. Significance of motor vehicle crashes and pelvic injury on fetal mortality: A five-year institutional review. *Journal of Trauma - Injury, Infection and Critical Care*. 2008;65(3):616-20.
36. Weiss HB, Sauber-Schatz EK, Cook LJ. The epidemiology of pregnancy-associated emergency department injury visits and their impact on birth outcomes. *Accident Analysis & Prevention*. 2008;40(3):pp 1088-95.
37. Schiff MA, Mack CD, Kaufman RP, Holt VL, Grossman DC. The Effect of Air Bags on Pregnancy Outcomes in Washington State: 2002-2005. *Obstetrics and Gynecology*. 2010;115(1):pp 85-92.
38. Brookfield KF, Gonzalez-Quintero VH, Davis JS, Schulman CI. Maternal death in the emergency department from trauma. *Archives of Gynecology & Obstetrics*. 2013;288(3):507-12.
39. Luley T, Fitzpatrick CB, Grotegut CA, Hocker MB, Myers ER, Brown HL. Perinatal implications of motor vehicle accident trauma during pregnancy: Identifying populations at risk. *American Journal of Obstetrics and Gynecology*. 2013;208(6):466.e1-.e5.
40. Whitehead NS. Prenatal Counseling on Seat Belt Use and Crash-Related Medical Care. *Maternal and Child Health Journal*. 2013;17(9):pp 1527-32.
41. Azar T, Longo C, Oddy L, Abenhaim HA. Motor vehicle collision-related accidents in pregnancy. *Journal of Obstetrics and Gynaecology Research*. 2015;41(9):pp 1370-6.
42. Miller N, Biron-Shental T, Peleg K, Fishman A, Olsha O, Givon A, et al. Are pregnant women safer in motor vehicle accidents? *Journal of Perinatal Medicine*. 2016;44(3):329-32.
43. Liberati A, Altman DG, Tetzlaff J, Mulrow C, Gotzsche PC, Ioannidis JP, et al. The PRISMA statement for reporting systematic reviews and meta-analyses of studies that evaluate health care interventions: explanation and elaboration. *Annals of internal medicine*. 2009;151(4):W65-94.

- 1  
2  
3 44. Glasziou P, Irwig L, Bain C, Colditz G. Frequency and rate. In: Systematic reviews in health  
4 care: a practical guide, 2nd edn. Cambridge, UK: Cambridge University Press, 2001: 67–73.  
5  
6 45. Lo CK, Mertz D, Loeb M. Newcastle-Ottawa Scale: comparing reviewers' to authors'  
7 assessments. BMC Med Res Methodol. 2014;14:45.  
8 46. Colditz GA, Burdick E, Mosteller F. Heterogeneity in meta-analysis of data from  
9 epidemiologic studies: a commentary. Am J Epidemiol. 1995;142(4):371-82.  
10 47. Hyde LK, Cook LJ, Olson LM, Weiss HB, Dean JM. Effect of motor vehicle crashes on adverse  
11 fetal outcomes. Obstet Gynecol. 2003;102(2):279-86.  
12 48. Acar BS, Meric M. The effect of placenta location on the safety of pregnant driver and her  
13 fetus. International Journal of Crashworthiness. 2017;22(2):pp 163-8.  
14  
15  
16  
17  
18  
19  
20  
21  
22  
23  
24  
25  
26  
27  
28  
29  
30  
31  
32  
33  
34  
35  
36  
37  
38  
39  
40  
41  
42  
43  
44  
45  
46  
47  
48  
49  
50  
51  
52  
53  
54  
55  
56  
57  
58  
59  
60

For peer review only

1  
2  
3  
4  
5  
6  
7  
8  
9  
10  
11  
12  
13  
14  
15  
16  
17  
18  
19  
20  
21  
22  
23  
24  
25  
26  
27  
28  
29  
30  
31  
32  
33  
34  
35  
36  
37  
38  
39  
40  
41  
42  
43  
44  
45  
46  
47  
48  
49  
50  
51  
52  
53  
54  
55  
56  
57  
58  
59  
60



\*references of relevant non-systematic reviews and Google scholar

1  
2  
3  
4  
5  
6  
7  
8  
9  
10  
11  
12  
13  
14  
15  
16  
17  
18  
19  
20  
21  
22  
23  
24  
25  
26  
27  
28  
29  
30  
31  
32  
33  
34  
35  
36  
37  
38  
39  
40  
41  
42  
43  
44  
45  
46  
47  
48  
49  
50  
51  
52  
53  
54  
55  
56  
57  
58  
59  
60



review only



Outcome



No Involvement in MVC | Involvement in MVC

For peer review only - <http://bmjopen.bmj.com/site/about/guidelines.xhtml>

0.101

9.91

MVC

MVC

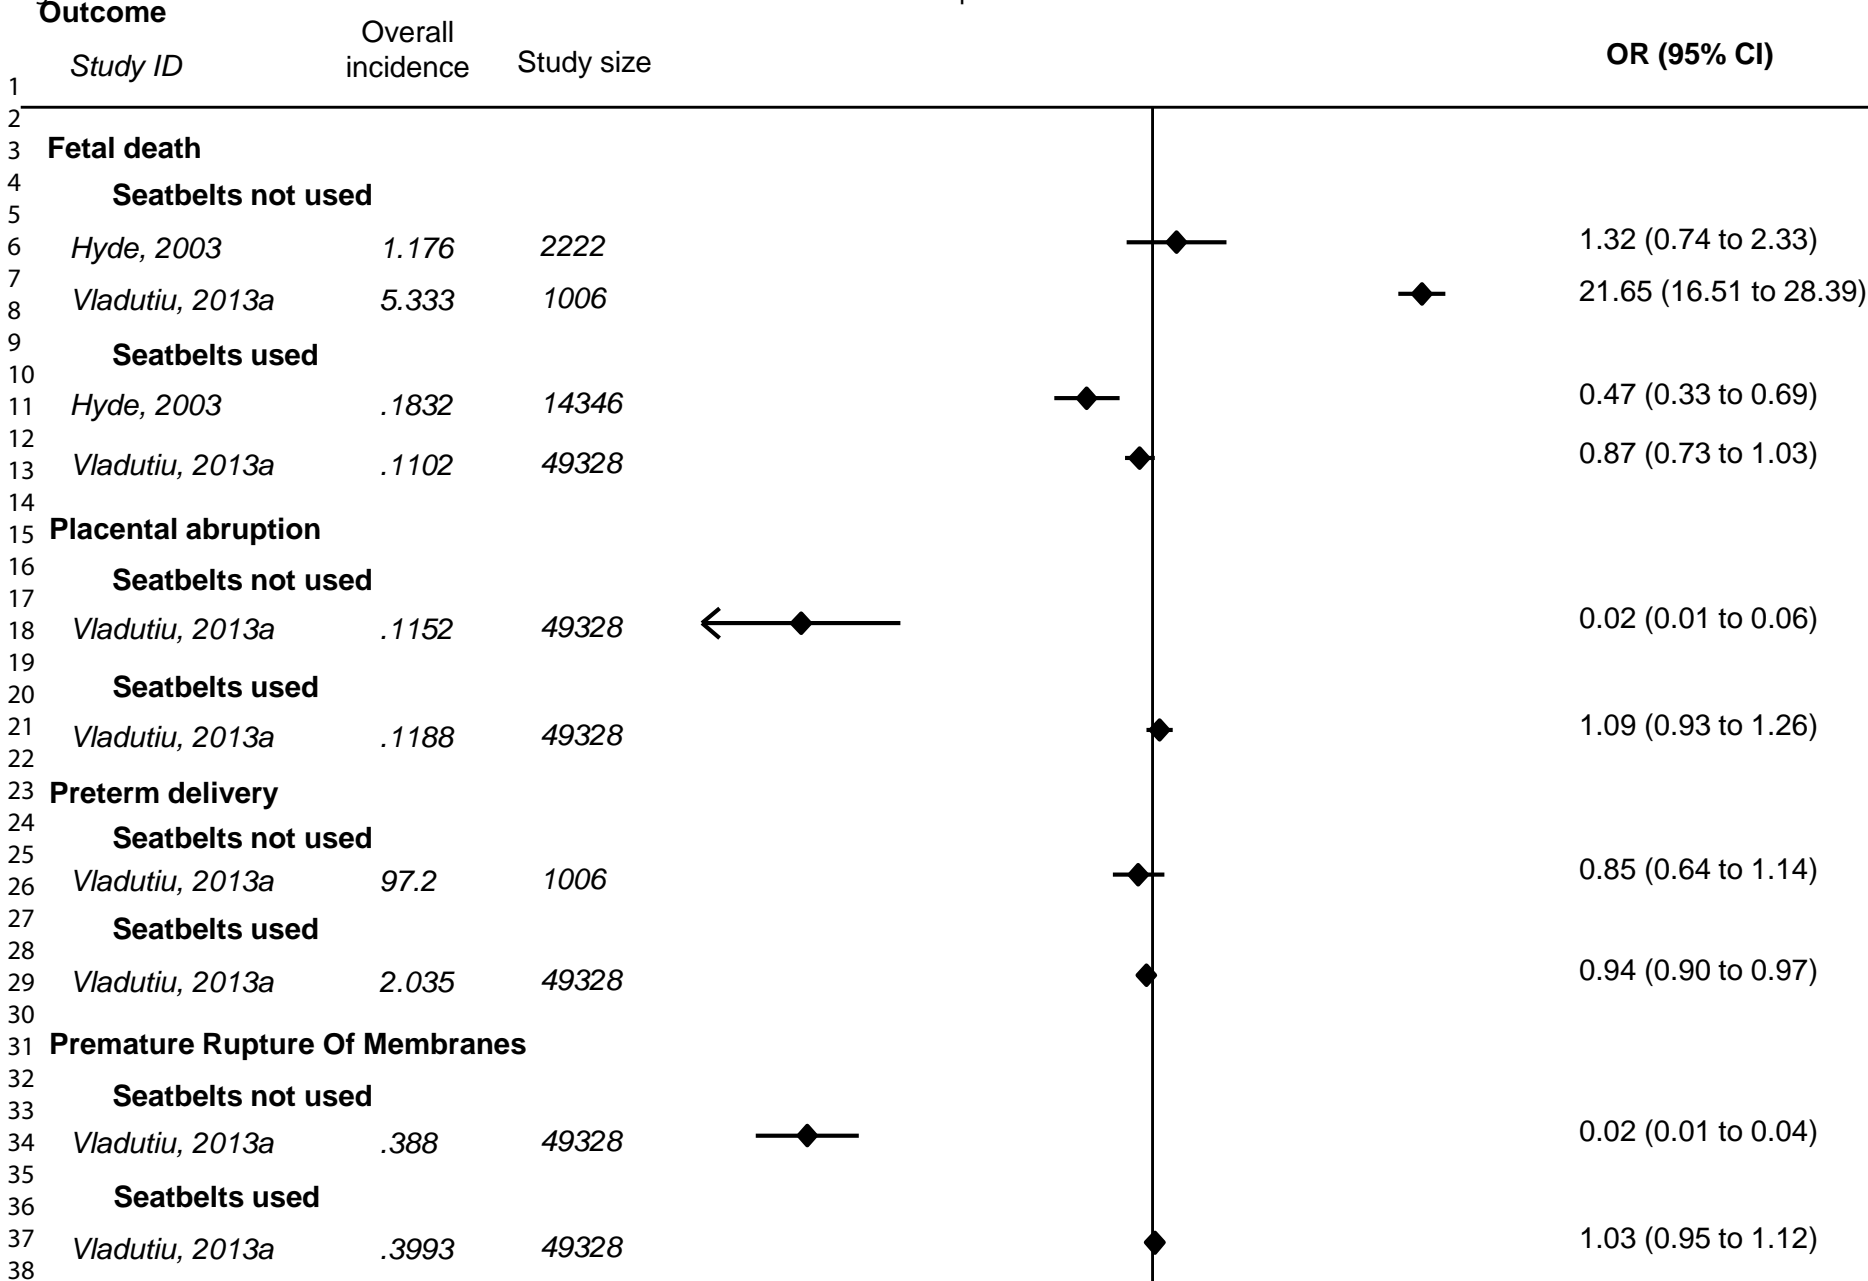

| Study ID (Subgroup)                  | MVC        |              | Non MVC     |                | Weight        | Odds Ratio M-H, Random, 95% CI |
|--------------------------------------|------------|--------------|-------------|----------------|---------------|--------------------------------|
|                                      | Events     | Total        | Events      | Total          |               |                                |
| <b>Fetal deaths (seatbelts used)</b> |            |              |             |                |               |                                |
| Hyde 2003                            | 28         | 7145         | 2600        | 313674         | 46.2%         | 0.47 (0.32 to 0.68)            |
| Madutiu 2013                         | 133        | 24531        | 5305        | 848073         | 53.8%         | 0.87 (0.73 to 1.03)            |
| <b>Subtotal (95% CI)</b>             |            | <b>31676</b> |             | <b>1161747</b> | <b>100.0%</b> | <b>0.65 (0.36 to 1.19)</b>     |
| <b>Total events</b>                  | <b>161</b> |              | <b>7905</b> |                |               |                                |

Heterogeneity: Tau<sup>2</sup> = 0.17; Chi<sup>2</sup> = 8.58, df = 1 (P = 0.003); I<sup>2</sup> = 88%  
 Test for overall effect: Z = 1.39 (P = 0.16)

|                                         |           |             |             |                |               |                              |
|-----------------------------------------|-----------|-------------|-------------|----------------|---------------|------------------------------|
| <b>Fetal death (seatbelts not used)</b> |           |             |             |                |               |                              |
| Hyde 2003                               | 12        | 1099        | 2600        | 313674         | 49.8%         | 1.32 (0.75 to 2.34)          |
| Madutiu 2013                            | 60        | 443         | 5305        | 848073         | 50.2%         | 24.89 (18.93 to 32.71)       |
| <b>Subtotal (95% CI)</b>                |           | <b>1542</b> |             | <b>1161747</b> | <b>100.0%</b> | <b>5.78 (0.17 to 201.12)</b> |
| <b>Total events</b>                     | <b>72</b> |             | <b>7905</b> |                |               |                              |

Heterogeneity: Tau<sup>2</sup> = 6.51; Chi<sup>2</sup> = 126.07, df = 1 (P < 0.00001); I<sup>2</sup> = 99%  
 Test for overall effect: Z = 0.97 (P = 0.33)  
 Test for subgroup differences: Chi<sup>2</sup> = 1.41, df = 1 (P = 0.24), I<sup>2</sup> = 28.9%



\*MVC, motor vehicle crash

## Appendix 1. Search strategy for MEDLINE (via Ovid) executed from database inception up to July 2018

| Item | Search term                                                                                                                                        |
|------|----------------------------------------------------------------------------------------------------------------------------------------------------|
| 1    | pregnancy.af.                                                                                                                                      |
| 2    | pregnan*.sh.                                                                                                                                       |
| 3    | gravidity.sh.                                                                                                                                      |
| 4    | gravid*.sh.                                                                                                                                        |
| 5    | gestation*.sh.                                                                                                                                     |
| 6    | pregnant women.sh.                                                                                                                                 |
| 7    | pregnant wom#n.sh.                                                                                                                                 |
| 8    | (child adj3 bearing).tw.                                                                                                                           |
| 9    | childbearing.af.                                                                                                                                   |
| 10   | matern*.sh.                                                                                                                                        |
| 11   | vehicle* crash*.af.                                                                                                                                |
| 12   | vehicle* accident*.af.                                                                                                                             |
| 13   | vehicle* collision*.af.                                                                                                                            |
| 14   | motor vehicle crash*.af.                                                                                                                           |
| 15   | motor vehicle accident*.af.                                                                                                                        |
| 16   | motor vehicle collision*.af.                                                                                                                       |
| 17   | motor vehicle injur*.af.                                                                                                                           |
| 18   | vehicle* injur*.af.                                                                                                                                |
| 19   | road traffic crash*.af.                                                                                                                            |
| 20   | road traffic accident*.af.                                                                                                                         |
| 21   | road traffic collision*.af.                                                                                                                        |
| 22   | road traffic injur*.af.                                                                                                                            |
| 23   | auto* crash*.af.                                                                                                                                   |
| 24   | auto* accident*.af.                                                                                                                                |
| 25   | auto* collision*.af.                                                                                                                               |
| 26   | auto* injur*.af.                                                                                                                                   |
| 27   | car crash*.af.                                                                                                                                     |
| 28   | car accident*.af.                                                                                                                                  |
| 29   | car collision*.af.                                                                                                                                 |
| 30   | car injur*.af.                                                                                                                                     |
| 31   | (car adj3 trauma).af.                                                                                                                              |
| 32   | (automobile adj3 trauma).af.                                                                                                                       |
| 33   | (automotive adj3 trauma).af.                                                                                                                       |
| 34   | (road traffic adj3 trauma).af.                                                                                                                     |
| 35   | (motor vehicle adj3 trauma).af.                                                                                                                    |
| 36   | 1 or 2 or 3 or 4 or 5 or 6 or 7 or 8 or 9 or 10                                                                                                    |
| 37   | 11 or 12 or 13 or 14 or 15 or 16 or 17 or 18 or 19 or 20 or 21 or 22 or 23 or 24 or 25 or 26 or 27 or 28 or 29 or 30 or 31 or 32 or 33 or 34 or 35 |
| 38   | 36 and 37                                                                                                                                          |

## Appendix 2 List of excluded studies with reasons

| Study ID                 | Reason                                                                                                                                                 | Reference                                                                                                |
|--------------------------|--------------------------------------------------------------------------------------------------------------------------------------------------------|----------------------------------------------------------------------------------------------------------|
| <b>Al Mulhim, 2012</b>   | Pregnancy loss or not after trauma in Arabic pregnant women                                                                                            | <i>EMHJ. Vol. 18 No. 5 2012</i>                                                                          |
| <b>Battaloglu 2016</b>   | From a cohort of 15,140 female patients, 173 were pregnant women in the trauma registry. 55.5% of them from vehicle collision                          | <b>SR Petrone, 2017</b><br><i>Injury, Int. J. Care Injured 47 (2016) 184-187</i>                         |
| <b>Barre 2006</b>        | Pregnant women with abdominal trauma during pregnancy (n=65). Half of them from a traffic accident.                                                    | <b>SR Petrone, 2017</b><br><i>La Revue Sage-Femme. Vol 5, Issue 6, 2006, 312-316</i>                     |
| <b>Cannada 2010</b>      | Pregnant women with orthopaedic injuries (n=65)                                                                                                        | <b>SR Petrone, 2017</b><br><i>Injury, Infection, and Critical Care.2010. Vol. 69 (3)</i>                 |
| <b>Chamberlain, 2011</b> | Communication abstract. Retrospective cohort study. Identification of 272 pregnant trauma victims. 78.6% of them incurred in a MVC. No data to extract | <i>American Journal of Obstetrics &amp; Gynecology Supplement to January 2011</i>                        |
| <b>Cheng, 2012</b>       | Maternal complications during delivery according to uninjured, minor and severe injuries. 2,881 pregnant women (47,4%) involved in MVC                 | <i>World J Surg (2012) 36:2767–2775</i>                                                                  |
| <b>Connolly, 1997</b>    | 476 maternal records of trauma cases. 54.6% were MVC. No more data available                                                                           | <i>American Journal of Perinatology.1997.Vol. 14 (6)</i>                                                 |
| <b>Corsi 1999</b>        | Twenty-seven traumatised pregnant women were analysed retrospectively over a period of 9 years in Sao Paulo, Brazil                                    | <b>SR Petrone, 2017</b><br><i>Injury, Int. J. Care Injured 30 (1999) 239-243</i>                         |
| <b>Dannenberg, 1995</b>  | Homicide and other injuries as causes of maternal death between 1987 and 1991 in New York                                                              | <i>Am J Obstet Gynecol Vol.172 (5)</i>                                                                   |
| <b>Deshpande, 2017</b>   | Trauma impact on maternal mortality. Comparability between pregnant vs. non pregnant women                                                             | <i>American Journal of Obstetrics &amp; Gynecology 2017. 590.e2</i>                                      |
| <b>El Kady 2004</b>      | Retrospective cohort study of women hospitalized for Trauma in California                                                                              | <b>SR Petrone, 2017</b><br><i>American Journal of Obstetrics and Gynecology (2004) 190, 1661-8</i>       |
| <b>El Kady D, 2006</b>   | Fractures injuries on maternal/neonatal outcomes in United States                                                                                      | <b>SR Méndez -Figuroa 2013</b><br><i>American Journal of Obstetrics and Gynecology (2006) 195, 711–6</i> |
| <b>Fischer 2011</b>      | Minor trauma and poor fetal outcomes in Tennessee, Memphis                                                                                             | <b>SR Petrone, 2017</b><br><i>Injury, Infection, and Critical Care. 2011. Vol. 71 (1)</i>                |
| <b>Gibbins, 2017</b>     | Communication. MVC and Stillbirth. Secondary analysis of 439 stillbirth                                                                                | <i>American Journal of Obstetrics &amp; Gynecology Supplement to January 2017</i>                        |
| <b>Goodwin, 1990</b>     | Case-series of trauma pregnant women between 1987 and 1988 in Los Angeles                                                                              | <b>SR Méndez -Figuroa 2013</b><br><i>Am J Obstet Gynecol. 1990 Vol. 162 (3).</i>                         |
| <b>Hardt, 2013</b>       | Prenatal risk screening to identify women at increased risk for traumatic pregnancy-                                                                   | <i>Women's Health Issues 23-3 (2013) e187–e193</i>                                                       |

|                          |                                                                                                                                                                                            |                                                                                                               |
|--------------------------|--------------------------------------------------------------------------------------------------------------------------------------------------------------------------------------------|---------------------------------------------------------------------------------------------------------------|
|                          | associated death                                                                                                                                                                           |                                                                                                               |
| <b>Hardy, 1974</b>       | Maternal mortality ratios at large urban charity hospitals from 1941 to 1971                                                                                                               | <i>Obstetric and Gynecology. 1974. Vol.43 (1)</i>                                                             |
| <b>Harland 2014</b>      | Risks factors of maternal injuries in a population-based sample of pregnant women from Iowa                                                                                                | <b>SR Petrone, 2017</b><br><i>Journal of Women's Health. 2014. Vol. 23 (12)</i>                               |
| <b>Hitosugi 2006</b>     | 135 traffic accidents involving Japanese pregnant women from insurance companies. The outcomes of neonates determined by their condition 1 month after birth (death/abortion/healthy)      | <b>SR Petrone, 2017</b><br><i>Forensic Science International 159 (2006) 51-54</i>                             |
| <b>Ikossi, 2005</b>      | Risks factors of trauma in pregnant women from San Francisco, California                                                                                                                   | <i>J Am Coll Surg. Vol. 2005. 200 (1)</i>                                                                     |
| <b>Lynch, 2011</b>       | Pregnancy associated- death in Ohio: 2003-2007                                                                                                                                             | American Journal of Obstetrics & Gynecology Supplement to January 2011                                        |
| <b>Manoogian, 2015</b>   | Injuries characteristics between pregnant vs non pregnant women occupants (not outcome)                                                                                                    | <i>Accident Analysis and Prevention 74 (2015). 69-76</i>                                                      |
| <b>Melamed 2012</b>      | Outcomes following blunt trauma in Pregnant women from Israel                                                                                                                              | <b>SR Petrone, 2017</b><br><i>The Journal of Maternal-Fetal and Neonatal Medicine. 2012; 25(9): 1612-1617</i> |
| <b>Mesdaghinia, 2012</b> | Causes of trauma in 32 pregnant women with trauma in a Hospital in Iran                                                                                                                    | <i>Arch Trauma Res. 2012;1(1):23-26</i>                                                                       |
| <b>Nannini, 2008</b>     | Risks of injury in pregnant women in Massachusets                                                                                                                                          | <i>Journal of Midwifery &amp; Women's Health.2008. Vol.53 (1)</i>                                             |
| <b>Omoke, 2013</b>       | Trauma during pregnancy in a Nigerian setting                                                                                                                                              | <i>Int J Crit Illn Inj Sci. 2013; 3(4): 269-273.</i>                                                          |
| <b>Osei-Ampofo, 2016</b> | A cross-sectional study with 134 pregnant women from Ghana visiting the emergency care. Leading injury MVC (23%). Not outcomes                                                             | <i>African Journal of Emergency Medicine (2016) 6, 87-93</i>                                                  |
| <b>Pak, 1998</b>         | Delivery outcomes after a blunt abdominal trauma in 85 pregnant women                                                                                                                      | <i>Am J Obstet Gynecol. 1998. Vol. 179 (5)</i>                                                                |
| <b>Patteson, 2007</b>    | High risk factors involved in trauma during pregnancy. Not outcomes                                                                                                                        | <i>The Journal of TRAUMA Injury, Infection, and Critical Care. 2007. Vol 62 (4)</i>                           |
| <b>Pearlman, 1990</b>    | Not possible to assess full text                                                                                                                                                           | SR Méndez -Figueroa 2013                                                                                      |
| <b>Schiff, 1997</b>      | Seat Bealt use. Protective factor of maternal mortality after a MVC in Mexico                                                                                                              | <i>WJM, 1997. Vol. 167 (1)</i>                                                                                |
| <b>Schuster, 2016</b>    | Communication abstract. Impact of blunt trauma on maternal and pregnancy outcome. MVC the most common injury mechanism (70%). Pennsylvania Trauma Systems Foundation Database (1996-2013). | <i>American Journal of Obstetrics &amp; Gynecology. Supplement to January 2016</i>                            |
| <b>Schuster, 2018</b>    | Pennsylvania Trauma Systems Foundation Database. ISS>9 and SBP<90mmHg are predictors for poor outcomes after trauma during pregnancy                                                       | <i>Trauma, 2018. Vol. 20(1) 30-37</i>                                                                         |
| <b>Sela, 2011</b>        | Treatment provided to pregnant motor vehicle accident (MVA) casualties in a mature trauma system in Israel                                                                                 | <i>Annals of Surgery, 2011.Vol.254 (2)</i>                                                                    |

|                            |                                                                                                                               |                                                                                                                                        |
|----------------------------|-------------------------------------------------------------------------------------------------------------------------------|----------------------------------------------------------------------------------------------------------------------------------------|
| <b>Shah, 1998</b>          | Trauma in general in pregnant women                                                                                           | <i>J Trauma. 1998 Jul;45(1):83-6</i>                                                                                                   |
| <b>Shakerian 2015</b>      | Determining adherence to recommended imaging guidelines in pregnant women from Victoria, Australia                            | <b>SR Petrone, 2017</b><br><i>J Trauma Acute Care Surg. 2015.Vol. 78 (1)</i>                                                           |
| <b>Shiff 2002</b>          | Retrospective cohort study to assess outcomes of pregnant women hospitalized for injury in Washington State from 1989 to 1997 | <b>SR Petrone, 2017</b><br><i>J Trauma. 2002; 53: 939–945.</i>                                                                         |
| <b>Sirin, 2007</b>         | Report the prevalence of seatbelt counselling by prenatal care providers during pregnancy in USA                              | <i>Matern Child Health J (2007) 11:505–510</i>                                                                                         |
| <b>Tinker 2010</b>         | Risks factors involved in injuries in pregnant women from the National Birth Defects Prevention Study, USA                    | <b>SR Petrone, 2017</b><br><i>Journal of Women's Health. 2010. Vol. 19 (2)</i>                                                         |
| <b>Van der Knoop, 2015</b> | Effect of maternal trauma in fetal motility at term and at one year of age                                                    | <i>Early Human Development 91 (2015) 511–517</i>                                                                                       |
| <b>Van der Knoop, 2018</b> | Matched case-control study. Neurobehavioral outcome in 6-18 year old children after trauma in pregnancy                       | <i>European Journal of Paediatric Neurology (2018), 22(5):845-853</i>                                                                  |
| <b>Vladutiu, 2013b</b>     | Same sample Vladutiu 2013a; excluded as a secondary analysis from already included study                                      | <i>Accid Anal Prev. 2013; 55: 165–171</i>                                                                                              |
| <b>Wahabi, 2007</b>        | 45 MVC case series pregnant women collected over a 10- year period                                                            | <i>Saudi Med J. 2007. Vol. 28 (9)</i>                                                                                                  |
| <b>Wall 2014</b>           | Pregnant trauma patients from South Africa (mainly assaults)                                                                  | <b>SR Petrone, 2017</b><br><i>Injury, Int. J. Care Injured 45 (2014) 1220–1223</i>                                                     |
| <b>Weiner 2016</b>         | Minor trauma during pregnancy, not associated with adverse pregnancy outcomes, Israel                                         | <b>SR Petrone, 2017</b><br><i>European Journal Of Obstetrics &amp; Gynecology and Reproductive Biology 203 (2016): 78–81</i>           |
| <b>Weiss, 1999</b>         | Retrospect review of death certificates                                                                                       | <i>43rd Annual Proceedings Association for the Advancement of Automotive Medicine September 20-21, 1999. Barcelona (Sitges), Spain</i> |
| <b>Weiss, 2001</b>         | Retrospect review of death certificates                                                                                       | <i>JAMA, 2001. Vol. 286 (15)</i>                                                                                                       |
| <b>Weiss, 2002a</b>        | N/A                                                                                                                           |                                                                                                                                        |
| <b>Zangene, 2015</b>       | 102 cases of trauma in pregnancy registered in Iran from 2007 to 2010. MVC the most frequent (45%)                            | <i>Global Journal of Health Science. 2015. Vol 7 (2)</i>                                                                               |

## maternal outcomes

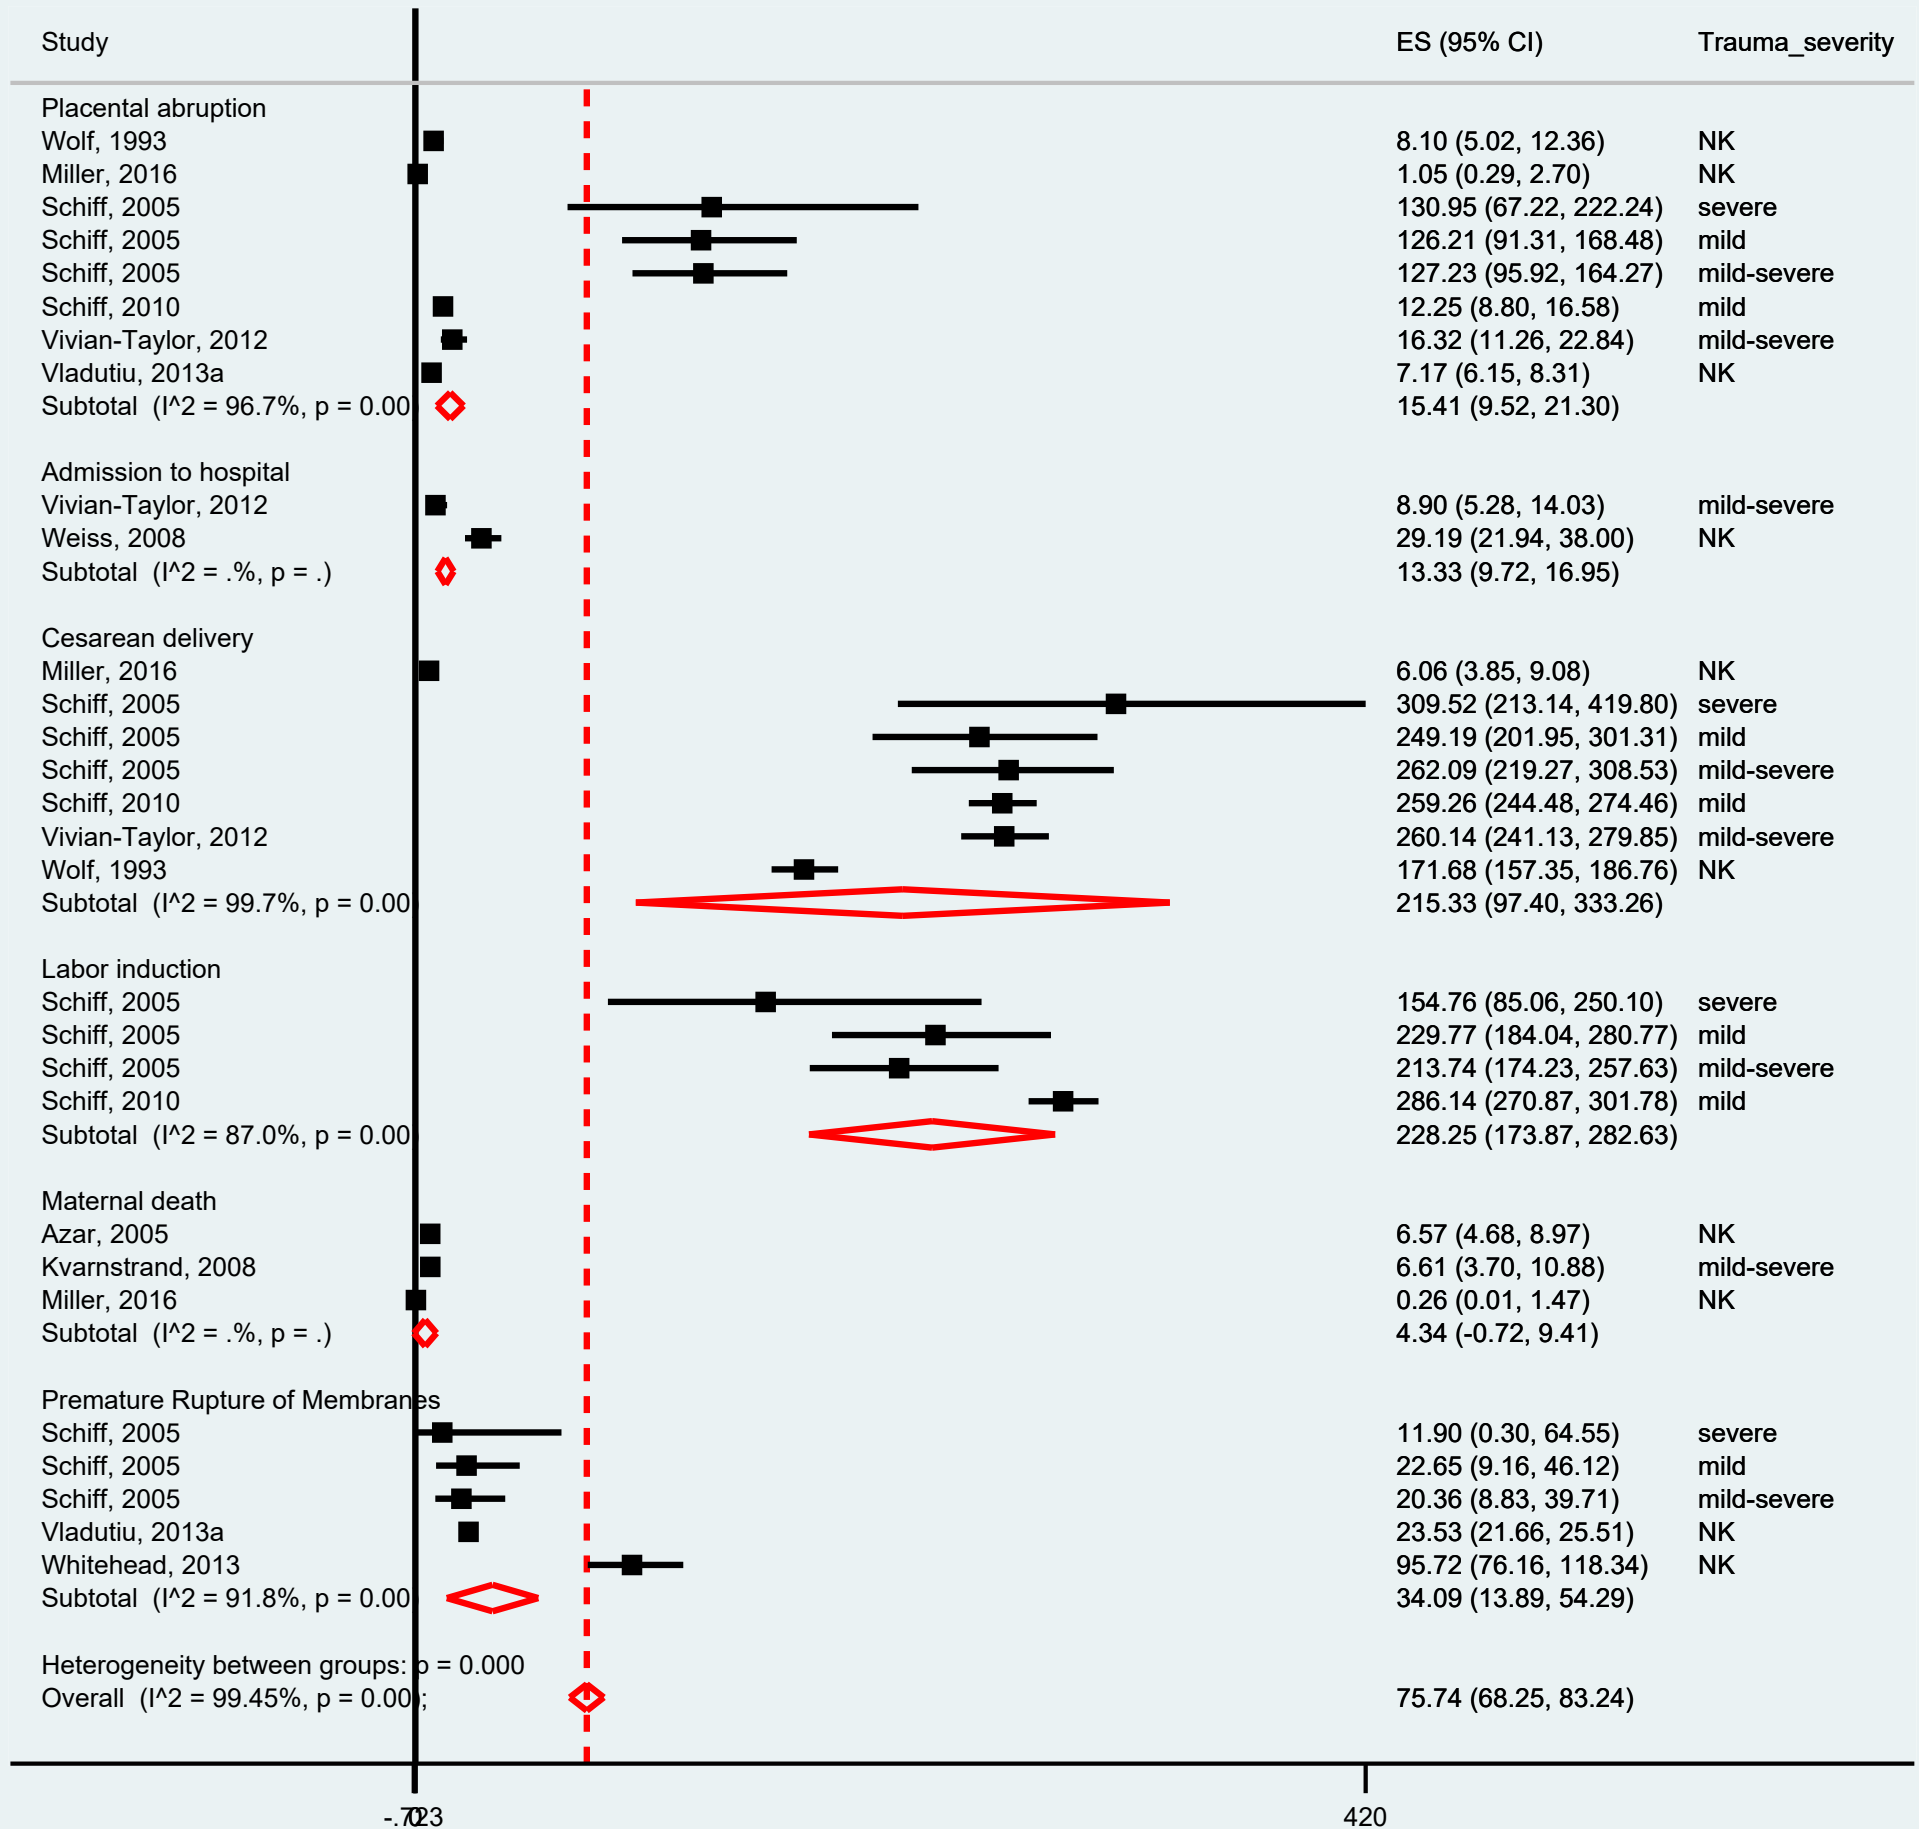



# offspring outcomes

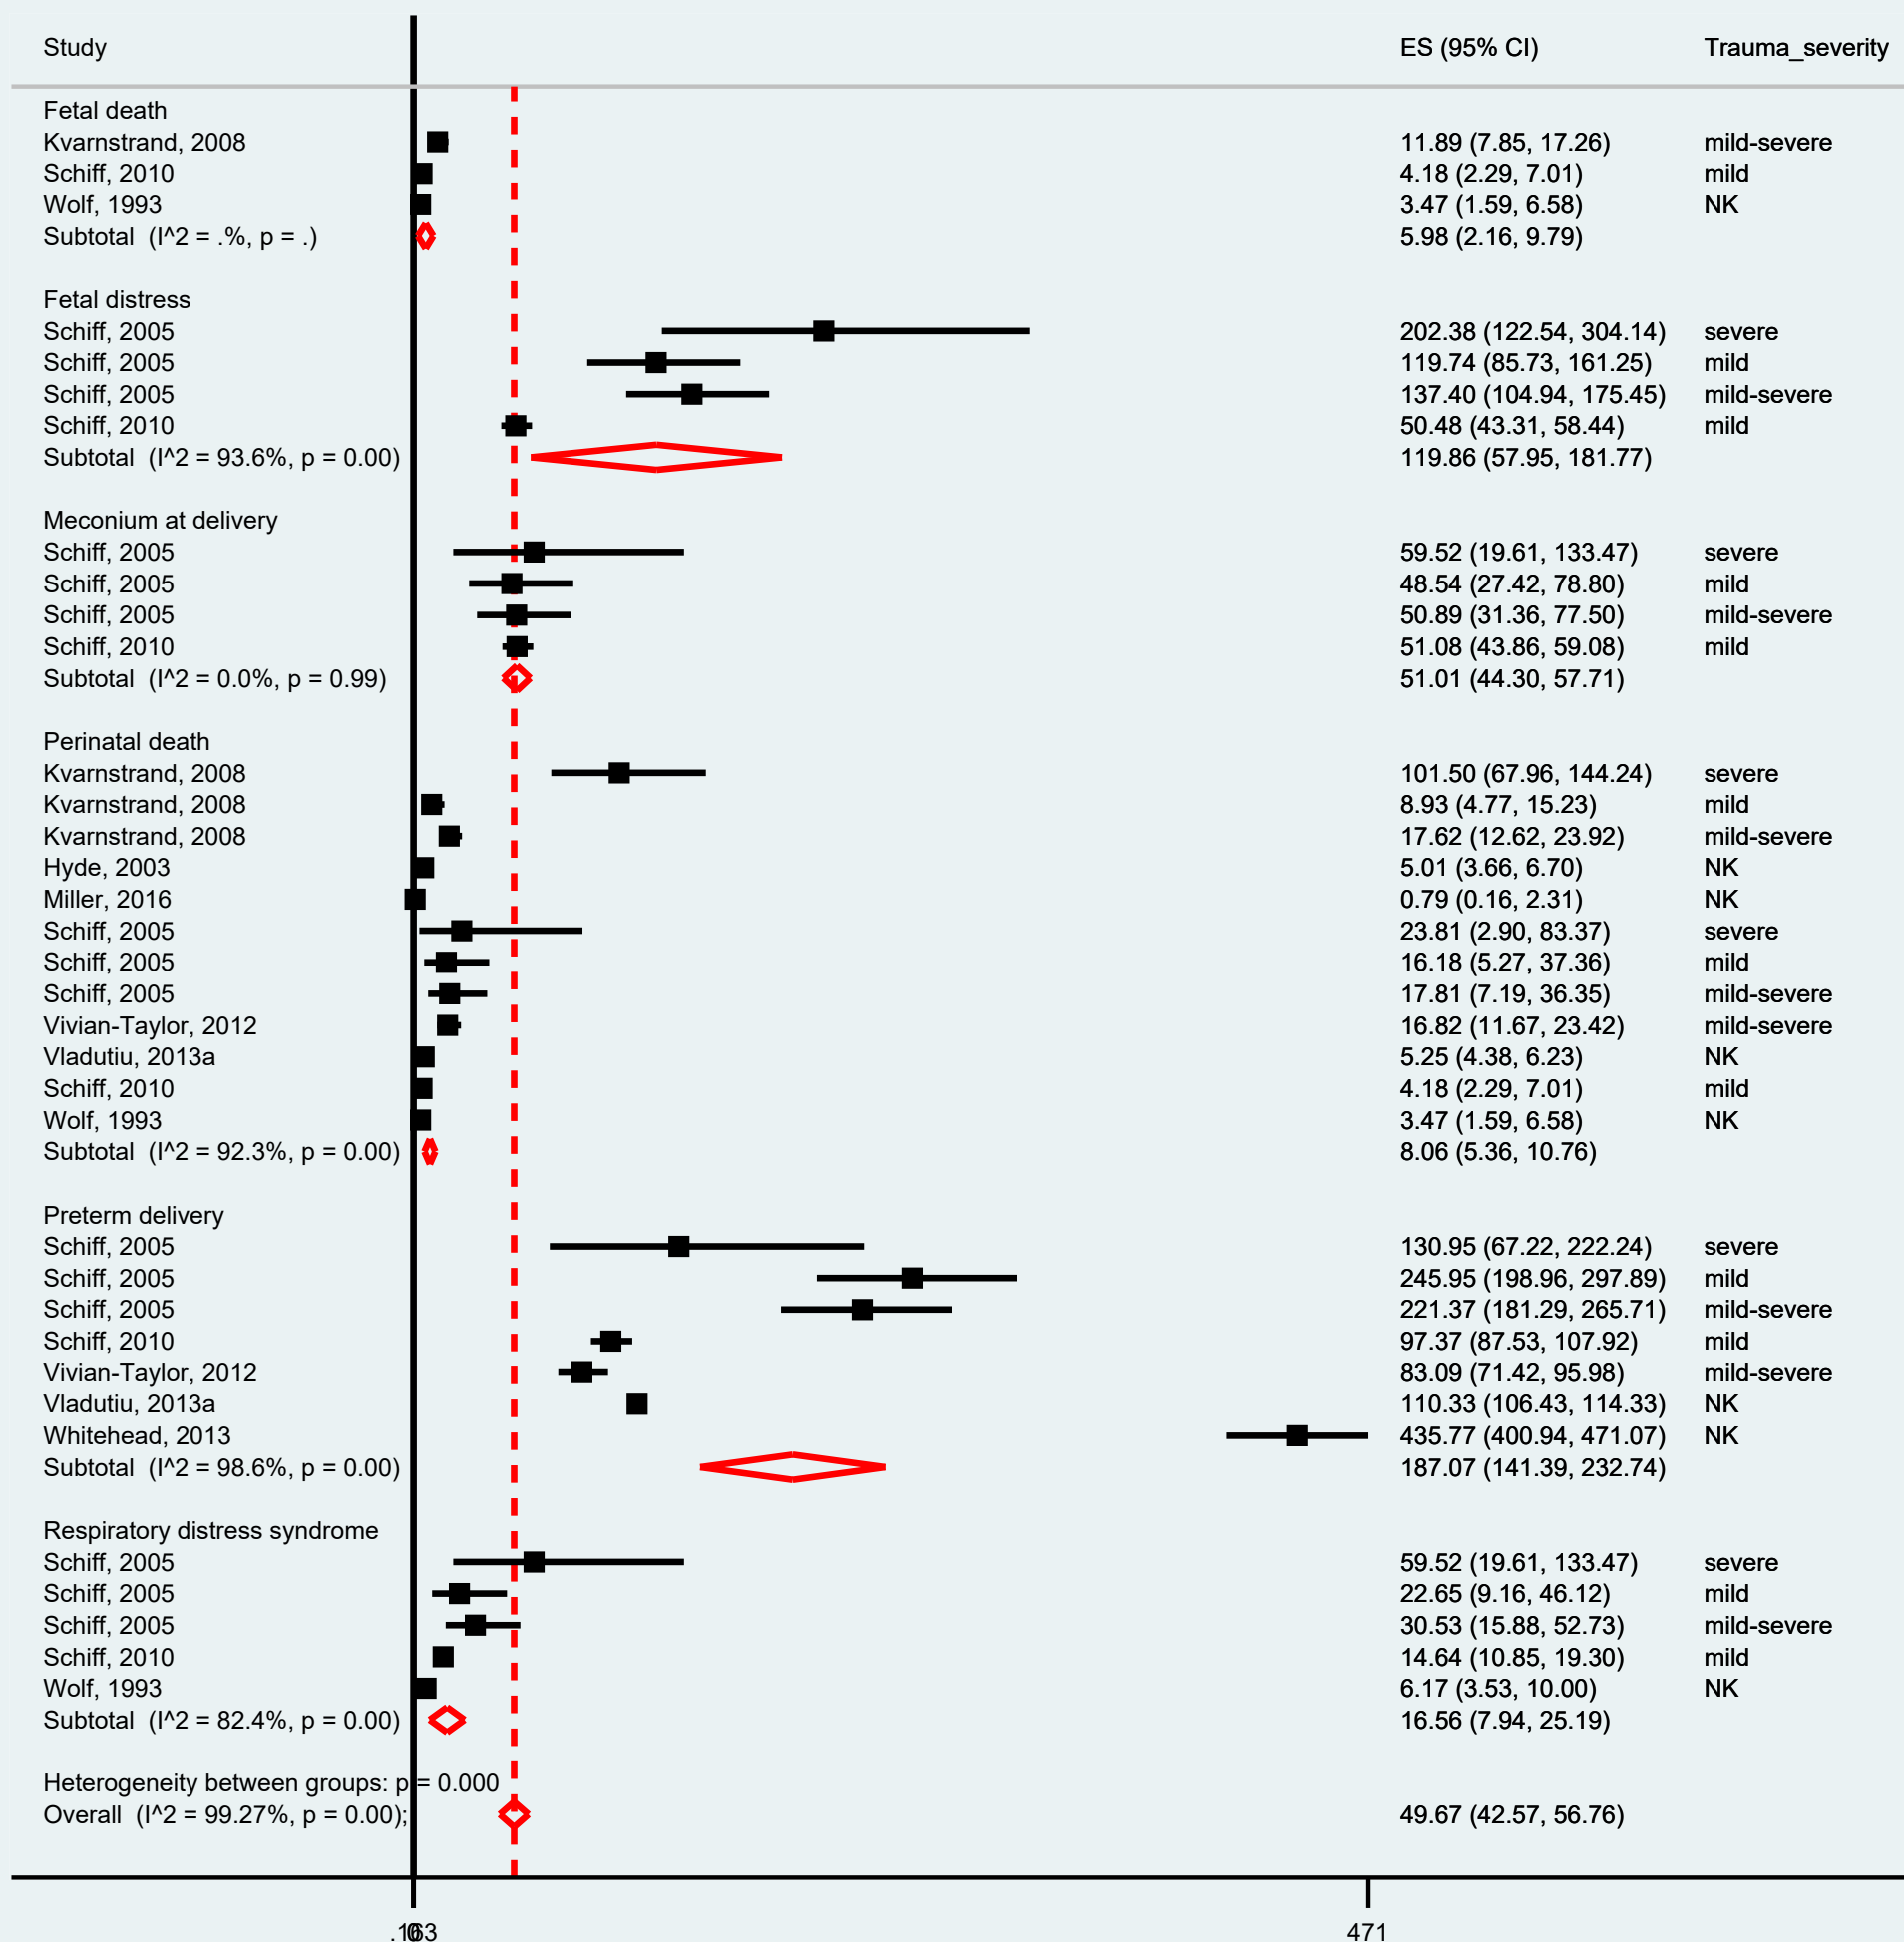

## Appendix 5. Incidence of maternal, fetal &amp; neonatal complications from single studies

| Outcome                           | Total sample size | Incidence estimate per 1,000 women (95%CI) |
|-----------------------------------|-------------------|--------------------------------------------|
| <b>Maternal outcomes</b>          |                   |                                            |
| Placental problems                | 235329            | 100.00 (98.79, 101.22)                     |
| Miscarriage                       | 3794              | 1.85 (0.74, 3.80)                          |
| Antepartum haemorrhage            | 2022              | 47.48 (38.62, 57.67)                       |
| Postpartum haemorrhage            | 2022              | 77.65 (66.35, 90.18)                       |
| Vaginal bleeding                  | 235329            | 247.00 (245.26, 248.75)                    |
| Hospital stay $\geq 6$ days       | 5936              | 117.92 (109.82, 126.40)                    |
| Maternal death or hospitalisation | 32810             | 135.05 (131.37, 138.80)                    |
| <b>Fetal and neonatal</b>         |                   |                                            |
| Hypoxia                           | 582               | 22.34 (11.95, 37.89)                       |
| Neonatal death                    | 2270              | 5.73 (3.05, 9.77)                          |
| Neonatal transfer                 | 2022              | 42.53 (34.16, 52.26)                       |

## Appendix 6. Incidence in non-population level data

| Outcome                      | Study ID            | Number of events | Group size | Trauma severity level |
|------------------------------|---------------------|------------------|------------|-----------------------|
| <b>Admission to hospital</b> | Brookfield, 2013    | 182              | 256        | Not given             |
|                              | Chibber, 2015       | 648              | 728        | Not given             |
| <b>Caesarean delivery</b>    | Chibber, 2015       | 529              | 728        | Not given             |
|                              | Luley 2013          | 32               | 126        | Not given             |
|                              | Orji, 2002          | 2                | 84         | Not given             |
| <b>Fetal death</b>           | Aboutanos, 2007     | 1                | 148        | Not given             |
|                              | Chibber, 2015       | 78               | 728        | Not given             |
| <b>Fetal distress</b>        | Chibber, 2015       | 412              | 728        | Not given             |
| <b>Fetal tachycardia</b>     | Orji, 2002          | 10               | 84         | Not given             |
| <b>Hydrops fetalis</b>       | Aboutanos, 2007     | 1                | 148        | Not given             |
|                              | Aboutanos, 2007     | 0                | 148        | Not given             |
|                              | Baerga-Varela, 2000 | 1                | 39         | Severe                |
|                              | Brookfield, 2013    | 7                | 256        | Not given             |
| <b>Maternal death</b>        | Chibber, 2015       | 100              | 728        | Not given             |
|                              | Orji, 2002          | 2                | 84         | Not given             |
|                              | Aboutanos, 2007     | 5                | 148        | Not given             |
|                              | Baerga-Varela, 2000 | 7                | 39         | Mild to severe        |
| <b>Perinatal death</b>       | Baerga-Varela, 2000 | 23               | 39         | Mild to severe        |
|                              | Luley 2013          | 6                | 126        | Not given             |
|                              | Orji, 2002          | 3                | 84         | Not given             |
| <b>Placental abruption</b>   | Chibber, 2015       | 428              | 728        | Not given             |
|                              | Luley 2013          | 7                | 126        | Not given             |
|                              | Orji, 2002          | 1                | 84         | Not given             |
| <b>Preterm delivery</b>      | Chibber, 2015       | 97               | 728        | Not given             |
| <b>Uterine rupture</b>       | Chibber, 2015       | 12               | 728        | Not given             |
|                              | Orji, 2002          | 1                | 84         | Not given             |



# PRISMA 2009 Checklist

| Section/topic                      | #  | Checklist item                                                                                                                                                                                                                                                                                              | Reported on page # |
|------------------------------------|----|-------------------------------------------------------------------------------------------------------------------------------------------------------------------------------------------------------------------------------------------------------------------------------------------------------------|--------------------|
| <b>TITLE</b>                       |    |                                                                                                                                                                                                                                                                                                             |                    |
| Title                              | 1  | Identify the report as a systematic review, meta-analysis, or both.                                                                                                                                                                                                                                         | 1                  |
| <b>ABSTRACT</b>                    |    |                                                                                                                                                                                                                                                                                                             |                    |
| Structured summary                 | 2  | Provide a structured summary including, as applicable: background; objectives; data sources; study eligibility criteria, participants, and interventions; study appraisal and synthesis methods; results; limitations; conclusions and implications of key findings; systematic review registration number. | 2-3                |
| <b>INTRODUCTION</b>                |    |                                                                                                                                                                                                                                                                                                             |                    |
| Rationale                          | 3  | Describe the rationale for the review in the context of what is already known.                                                                                                                                                                                                                              | 4                  |
| Objectives                         | 4  | Provide an explicit statement of questions being addressed with reference to participants, interventions, comparisons, outcomes, and study design (PICOS).                                                                                                                                                  | 5                  |
| <b>METHODS</b>                     |    |                                                                                                                                                                                                                                                                                                             |                    |
| Protocol and registration          | 5  | Indicate if a review protocol exists, if and where it can be accessed (e.g., Web address), and, if available, provide registration information including registration number.                                                                                                                               | 5                  |
| Eligibility criteria               | 6  | Specify study characteristics (e.g., PICOS, length of follow-up) and report characteristics (e.g., years considered, language, publication status) used as criteria for eligibility, giving rationale.                                                                                                      | 5-7                |
| Information sources                | 7  | Describe all information sources (e.g., databases with dates of coverage, contact with study authors to identify additional studies) in the search and date last searched.                                                                                                                                  | 5                  |
| Search                             | 8  | Present full electronic search strategy for at least one database, including any limits used, such that it could be repeated.                                                                                                                                                                               | Appendix 1         |
| Study selection                    | 9  | State the process for selecting studies (i.e., screening, eligibility, included in systematic review, and, if applicable, included in the meta-analysis).                                                                                                                                                   | 5-6,<br>Appendix 2 |
| Data collection process            | 10 | Describe method of data extraction from reports (e.g., piloted forms, independently, in duplicate) and any processes for obtaining and confirming data from investigators.                                                                                                                                  | 6-7                |
| Data items                         | 11 | List and define all variables for which data were sought (e.g., PICOS, funding sources) and any assumptions and simplifications made.                                                                                                                                                                       | 5-7                |
| Risk of bias in individual studies | 12 | Describe methods used for assessing risk of bias of individual studies (including specification of whether this was done at the study or outcome level), and how this information is to be used in any data synthesis.                                                                                      | 7                  |
| Summary measures                   | 13 | State the principal summary measures (e.g., risk ratio, difference in means).                                                                                                                                                                                                                               | 7-8                |
| Synthesis of results               | 14 | Describe the methods of handling data and combining results of studies, if done, including measures of consistency (e.g., $I^2$ ) for each meta-analysis.                                                                                                                                                   | 8                  |



# PRISMA 2009 Checklist

Page 1 of 2

| Section/topic                 | #  | Checklist item                                                                                                                                                                                           | Reported on page #                                       |
|-------------------------------|----|----------------------------------------------------------------------------------------------------------------------------------------------------------------------------------------------------------|----------------------------------------------------------|
| Risk of bias across studies   | 15 | Specify any assessment of risk of bias that may affect the cumulative evidence (e.g., publication bias, selective reporting within studies).                                                             | 7-8                                                      |
| Additional analyses           | 16 | Describe methods of additional analyses (e.g., sensitivity or subgroup analyses, meta-regression), if done, indicating which were pre-specified.                                                         | 7-8                                                      |
| <b>RESULTS</b>                |    |                                                                                                                                                                                                          |                                                          |
| Study selection               | 17 | Give numbers of studies screened, assessed for eligibility, and included in the review, with reasons for exclusions at each stage, ideally with a flow diagram.                                          | 8, <b>Figure 1</b>                                       |
| Study characteristics         | 18 | For each study, present characteristics for which data were extracted (e.g., study size, PICOS, follow-up period) and provide the citations.                                                             | 8, <b>Table 1</b>                                        |
| Risk of bias within studies   | 19 | Present data on risk of bias of each study and, if available, any outcome level assessment (see item 12).                                                                                                | 8, 9, <b>Figure 2</b>                                    |
| Results of individual studies | 20 | For all outcomes considered (benefits or harms), present, for each study: (a) simple summary data for each intervention group (b) effect estimates and confidence intervals, ideally with a forest plot. | 9,10 <b>Table 2, Figure 3 Figure S1,S2 Appendix 5, 6</b> |
| Synthesis of results          | 21 | Present results of each meta-analysis done, including confidence intervals and measures of consistency.                                                                                                  | 10, <b>Appendix 3, 4</b>                                 |
| Risk of bias across studies   | 22 | Present results of any assessment of risk of bias across studies (see Item 15).                                                                                                                          | 8,9 <b>Figure 2</b>                                      |
| Additional analysis           | 23 | Give results of additional analyses, if done (e.g., sensitivity or subgroup analyses, meta-regression [see Item 16]).                                                                                    | 9,10 <b>Figure S1, S2</b>                                |
| <b>DISCUSSION</b>             |    |                                                                                                                                                                                                          |                                                          |
| Summary of evidence           | 24 | Summarize the main findings including the strength of evidence for each main outcome; consider their relevance to key groups (e.g., healthcare providers, users, and policy makers).                     | 10                                                       |
| Limitations                   | 25 | Discuss limitations at study and outcome level (e.g., risk of bias), and at review-level (e.g., incomplete retrieval of identified research, reporting bias).                                            | 11                                                       |



# PRISMA 2009 Checklist

1  
2  
3  
4  
5  
6  
7  
8  
9  
10  
11  
12  
13  
14  
15  
16  
17  
18  
19  
20  
21  
22  
23  
24  
25  
26  
27  
28  
29  
30  
31  
32  
33  
34  
35  
36  
37  
38  
39  
40  
41  
42  
43  
44  
45  
46  
47

|                |    |                                                                                                                                            |    |
|----------------|----|--------------------------------------------------------------------------------------------------------------------------------------------|----|
| Conclusions    | 26 | Provide a general interpretation of the results in the context of other evidence, and implications for future research.                    | 12 |
| <b>FUNDING</b> |    |                                                                                                                                            |    |
| Funding        | 27 | Describe sources of funding for the systematic review and other support (e.g., supply of data); role of funders for the systematic review. | 3  |

From: Moher D, Liberati A, Tetzlaff J, Altman DG, The PRISMA Group (2009). Preferred Reporting Items for Systematic Reviews and Meta-Analyses: The PRISMA Statement. PLoS Med 6(7): e1000097. doi:10.1371/journal.pmed1000097

For more information, visit: [www.prisma-statement.org](http://www.prisma-statement.org).

For peer review only
