# Supplementary material for: Maternal trauma due to motor vehicle crashes and pregnancy outcomes: a systematic review and meta-analysis
Source: PubMed Central journal article supplement — BMJ Open. 2020 Oct 5;10(10):e035562. doi: 10.1136/bmjopen-2019-035562 (PMC7537450; doi:10.1136/bmjopen-2019-035562), 2020-10-05
Supplement: bmjopen-2019-035562supp001.pdf [file bmjopen-2019-035562supp001.pdf]

## Appendix 1. Search strategy for MEDLINE (via Ovid) executed from database inception up to July 2018

| Item | Search term                                                                                                                                        |
|------|----------------------------------------------------------------------------------------------------------------------------------------------------|
| 1    | pregnancy.af.                                                                                                                                      |
| 2    | pregnan*.sh.                                                                                                                                       |
| 3    | gravidity.sh.                                                                                                                                      |
| 4    | gravid*.sh.                                                                                                                                        |
| 5    | gestation*.sh.                                                                                                                                     |
| 6    | pregnant women.sh.                                                                                                                                 |
| 7    | pregnant wom#n.sh.                                                                                                                                 |
| 8    | (child adj3 bearing).tw.                                                                                                                           |
| 9    | childbearing.af.                                                                                                                                   |
| 10   | matern*.sh.                                                                                                                                        |
| 11   | vehicle* crash*.af.                                                                                                                                |
| 12   | vehicle* accident*.af.                                                                                                                             |
| 13   | vehicle* collision*.af.                                                                                                                            |
| 14   | motor vehicle crash*.af.                                                                                                                           |
| 15   | motor vehicle accident*.af.                                                                                                                        |
| 16   | motor vehicle collision*.af.                                                                                                                       |
| 17   | motor vehicle injur*.af.                                                                                                                           |
| 18   | vehicle* injur*.af.                                                                                                                                |
| 19   | road traffic crash*.af.                                                                                                                            |
| 20   | road traffic accident*.af.                                                                                                                         |
| 21   | road traffic collision*.af.                                                                                                                        |
| 22   | road traffic injur*.af.                                                                                                                            |
| 23   | auto* crash*.af.                                                                                                                                   |
| 24   | auto* accident*.af.                                                                                                                                |
| 25   | auto* collision*.af.                                                                                                                               |
| 26   | auto* injur*.af.                                                                                                                                   |
| 27   | car crash*.af.                                                                                                                                     |
| 28   | car accident*.af.                                                                                                                                  |
| 29   | car collision*.af.                                                                                                                                 |
| 30   | car injur*.af.                                                                                                                                     |
| 31   | (car adj3 trauma).af.                                                                                                                              |
| 32   | (automobile adj3 trauma).af.                                                                                                                       |
| 33   | (automotive adj3 trauma).af.                                                                                                                       |
| 34   | (road traffic adj3 trauma).af.                                                                                                                     |
| 35   | (motor vehicle adj3 trauma).af.                                                                                                                    |
| 36   | 1 or 2 or 3 or 4 or 5 or 6 or 7 or 8 or 9 or 10                                                                                                    |
| 37   | 11 or 12 or 13 or 14 or 15 or 16 or 17 or 18 or 19 or 20 or 21 or 22 or 23 or 24 or 25 or 26 or 27 or 28 or 29 or 30 or 31 or 32 or 33 or 34 or 35 |
| 38   | 36 and 37                                                                                                                                          |
