# Supplementary material for: Maternal trauma due to motor vehicle crashes and pregnancy outcomes: a systematic review and meta-analysis
Source: PubMed Central journal article supplement — BMJ Open. 2020 Oct 5;10(10):e035562. doi: 10.1136/bmjopen-2019-035562 (PMC7537450; doi:10.1136/bmjopen-2019-035562), 2020-10-05
Supplement: bmjopen-2019-035562supp002.pdf [file bmjopen-2019-035562supp002.pdf]

## Appendix 2 List of excluded studies with reasons

| Study ID                 | Reason                                                                                                                                                 | Reference                                                                                                |
|--------------------------|--------------------------------------------------------------------------------------------------------------------------------------------------------|----------------------------------------------------------------------------------------------------------|
| <b>Al Mulhim, 2012</b>   | Pregnancy loss or not after trauma in Arabic pregnant women                                                                                            | <i>EMHJ. Vol. 18 No. 5 2012</i>                                                                          |
| <b>Battaloglu 2016</b>   | From a cohort of 15,140 female patients, 173 were pregnant women in the trauma registry. 55.5% of them from vehicle collision                          | <b>SR Petrone, 2017</b><br><i>Injury, Int. J. Care Injured 47 (2016) 184-187</i>                         |
| <b>Barre 2006</b>        | Pregnant women with abdominal trauma during pregnancy (n=65). Half of them from a traffic accident.                                                    | <b>SR Petrone, 2017</b><br><i>La Revue Sage-Femme. Vol 5, Issue 6, 2006, 312-316</i>                     |
| <b>Cannada 2010</b>      | Pregnant women with orthopaedic injuries (n=65)                                                                                                        | <b>SR Petrone, 2017</b><br><i>Injury, Infection, and Critical Care.2010. Vol. 69 (3)</i>                 |
| <b>Chamberlain, 2011</b> | Communication abstract. Retrospective cohort study. Identification of 272 pregnant trauma victims. 78.6% of them incurred in a MVC. No data to extract | <i>American Journal of Obstetrics &amp; Gynecology Supplement to January 2011</i>                        |
| <b>Cheng, 2012</b>       | Maternal complications during delivery according to uninjured, minor and severe injuries. 2,881 pregnant women (47,4%) involved in MVC                 | <i>World J Surg (2012) 36:2767–2775</i>                                                                  |
| <b>Connolly, 1997</b>    | 476 maternal records of trauma cases. 54.6% were MVC. No more data available                                                                           | <i>American Journal of Perinatology.1997.Vol. 14 (6)</i>                                                 |
| <b>Corsi 1999</b>        | Twenty-seven traumatised pregnant women were analysed retrospectively over a period of 9 years in Sao Paulo, Brazil                                    | <b>SR Petrone, 2017</b><br><i>Injury, Int. J. Care Injured 30 (1999) 239-243</i>                         |
| <b>Dannenberg, 1995</b>  | Homicide and other injuries as causes of maternal death between 1987 and 1991 in New York                                                              | <i>Am J Obstet Gynecol Vol.172 (5)</i>                                                                   |
| <b>Deshpande, 2017</b>   | Trauma impact on maternal mortality. Comparability between pregnant vs. non pregnant women                                                             | <i>American Journal of Obstetrics &amp; Gynecology 2017. 590.e2</i>                                      |
| <b>El Kady 2004</b>      | Retrospective cohort study of women hospitalized for Trauma in California                                                                              | <b>SR Petrone, 2017</b><br><i>American Journal of Obstetrics and Gynecology (2004) 190, 1661-8</i>       |
| <b>El Kady D, 2006</b>   | Fractures injuries on maternal/neonatal outcomes in United States                                                                                      | <b>SR Méndez -Figuroa 2013</b><br><i>American Journal of Obstetrics and Gynecology (2006) 195, 711–6</i> |
| <b>Fischer 2011</b>      | Minor trauma and poor fetal outcomes in Tennessee, Memphis                                                                                             | <b>SR Petrone, 2017</b><br><i>Injury, Infection, and Critical Care. 2011. Vol. 71 (1)</i>                |
| <b>Gibbins, 2017</b>     | Communication. MVC and Stillbirth. Secondary analysis of 439 stillbirth                                                                                | <i>American Journal of Obstetrics &amp; Gynecology Supplement to January 2017</i>                        |
| <b>Goodwin, 1990</b>     | Case-series of trauma pregnant women between 1987 and 1988 in Los Angeles                                                                              | <b>SR Méndez -Figuroa 2013</b><br><i>Am J Obstet Gynecol. 1990 Vol. 162 (3).</i>                         |
| <b>Hardt, 2013</b>       | Prenatal risk screening to identify women at increased risk for traumatic pregnancy-                                                                   | <i>Women's Health Issues 23-3 (2013) e187–e193</i>                                                       |

|                          |                                                                                                                                                                                            |                                                                                                               |
|--------------------------|--------------------------------------------------------------------------------------------------------------------------------------------------------------------------------------------|---------------------------------------------------------------------------------------------------------------|
|                          | associated death                                                                                                                                                                           |                                                                                                               |
| <b>Hardy, 1974</b>       | Maternal mortality ratios at large urban charity hospitals from 1941 to 1971                                                                                                               | <i>Obstetric and Gynecology. 1974. Vol.43 (1)</i>                                                             |
| <b>Harland 2014</b>      | Risks factors of maternal injuries in a population-based sample of pregnant women from Iowa                                                                                                | <b>SR Petrone, 2017</b><br><i>Journal of Women's Health. 2014. Vol. 23 (12)</i>                               |
| <b>Hitosugi 2006</b>     | 135 traffic accidents involving Japanese pregnant women from insurance companies. The outcomes of neonates determined by their condition 1 month after birth (death/abortion/healthy)      | <b>SR Petrone, 2017</b><br><i>Forensic Science International 159 (2006) 51-54</i>                             |
| <b>Ikossi, 2005</b>      | Risks factors of trauma in pregnant women from San Francisco, California                                                                                                                   | <i>J Am Coll Surg. Vol. 2005. 200 (1)</i>                                                                     |
| <b>Lynch, 2011</b>       | Pregnancy associated- death in Ohio: 2003-2007                                                                                                                                             | American Journal of Obstetrics & Gynecology Supplement to January 2011                                        |
| <b>Manoogian, 2015</b>   | Injuries characteristics between pregnant vs non pregnant women occupants (not outcome)                                                                                                    | <i>Accident Analysis and Prevention 74 (2015). 69–76</i>                                                      |
| <b>Melamed 2012</b>      | Outcomes following blunt trauma in Pregnant women from Israel                                                                                                                              | <b>SR Petrone, 2017</b><br><i>The Journal of Maternal-Fetal and Neonatal Medicine. 2012; 25(9): 1612–1617</i> |
| <b>Mesdaghinia, 2012</b> | Causes of trauma in 32 pregnant women with trauma in a Hospital in Iran                                                                                                                    | <i>Arch Trauma Res. 2012;1(1):23-26</i>                                                                       |
| <b>Nannini, 2008</b>     | Risks of injury in pregnant women in Massachusets                                                                                                                                          | <i>Journal of Midwifery &amp; Women's Health.2008. Vol.53 (1)</i>                                             |
| <b>Omoke, 2013</b>       | Trauma during pregnancy in a Nigerian setting                                                                                                                                              | <i>Int J Crit Illn Inj Sci. 2013; 3(4): 269–273.</i>                                                          |
| <b>Osei-Ampofo, 2016</b> | A cross-sectional study with 134 pregnant women from Ghana visiting the emergency care. Leading injury MVC (23%). Not outcomes                                                             | <i>African Journal of Emergency Medicine (2016) 6, 87 –93</i>                                                 |
| <b>Pak, 1998</b>         | Delivery outcomes after a blunt abdominal trauma in 85 pregnant women                                                                                                                      | <i>Am J Obstet Gynecol. 1998. Vol. 179 (5)</i>                                                                |
| <b>Patteson, 2007</b>    | High risk factors involved in trauma during pregnancy. Not outcomes                                                                                                                        | <i>The Journal of TRAUMA Injury, Infection, and Critical Care. 2007. Vol 62 (4)</i>                           |
| <b>Pearlman, 1990</b>    | Not possible to assess full text                                                                                                                                                           | SR Méndez -Figuroa 2013                                                                                       |
| <b>Schiff, 1997</b>      | Seat Bealt use. Protective factor of maternal mortality after a MVC in Mexico                                                                                                              | <i>WJM, 1997. Vol. 167 (1)</i>                                                                                |
| <b>Schuster, 2016</b>    | Communication abstract. Impact of blunt trauma on maternal and pregnancy outcome. MVC the most common injury mechanism (70%). Pennsylvania Trauma Systems Foundation Database (1996-2013). | <i>American Journal of Obstetrics &amp; Gynecology. Supplement to January 2016</i>                            |
| <b>Schuster, 2018</b>    | Pennsylvania Trauma Systems Foundation Database. ISS>9 and SBP<90mmHg are predictors for poor outcomes after trauma during pregnancy                                                       | <i>Trauma, 2018. Vol. 20(1) 30–37</i>                                                                         |
| <b>Sela, 2011</b>        | Treatment provided to pregnant motor vehicle accident (MVA) casualties in a mature trauma system in Israel                                                                                 | <i>Annals of Surgery, 2011.Vol.254 (2)</i>                                                                    |

|                            |                                                                                                                               |                                                                                                                                        |
|----------------------------|-------------------------------------------------------------------------------------------------------------------------------|----------------------------------------------------------------------------------------------------------------------------------------|
| <b>Shah, 1998</b>          | Trauma in general in pregnant women                                                                                           | <i>J Trauma. 1998 Jul;45(1):83-6</i>                                                                                                   |
| <b>Shakerian 2015</b>      | Determining adherence to recommended imaging guidelines in pregnant women from Victoria, Australia                            | <b>SR Petrone, 2017</b><br><i>J Trauma Acute Care Surg. 2015. Vol. 78 (1)</i>                                                          |
| <b>Shiff 2002</b>          | Retrospective cohort study to assess outcomes of pregnant women hospitalized for injury in Washington State from 1989 to 1997 | <b>SR Petrone, 2017</b><br><i>J Trauma. 2002; 53: 939–945.</i>                                                                         |
| <b>Sirin, 2007</b>         | Report the prevalence of seatbelt counselling by prenatal care providers during pregnancy in USA                              | <i>Matern Child Health J (2007) 11:505–510</i>                                                                                         |
| <b>Tinker 2010</b>         | Risks factors involved in injuries in pregnant women from the National Birth Defects Prevention Study, USA                    | <b>SR Petrone, 2017</b><br><i>Journal of Women's Health. 2010. Vol. 19 (2)</i>                                                         |
| <b>Van der Knoop, 2015</b> | Effect of maternal trauma in fetal motility at term and at one year of age                                                    | <i>Early Human Development 91 (2015) 511–517</i>                                                                                       |
| <b>Van der Knoop, 2018</b> | Matched case-control study. Neurobehavioral outcome in 6-18 year old children after trauma in pregnancy                       | <i>European Journal of Paediatric Neurology (2018), 22(5):845-853</i>                                                                  |
| <b>Vladutiu, 2013b</b>     | Same sample Vladutiu 2013a; excluded as a secondary analysis from already included study                                      | <i>Accid Anal Prev. 2013; 55: 165–171</i>                                                                                              |
| <b>Wahabi, 2007</b>        | 45 MVC case series pregnant women collected over a 10- year period                                                            | <i>Saudi Med J. 2007. Vol. 28 (9)</i>                                                                                                  |
| <b>Wall 2014</b>           | Pregnant trauma patients from South Africa (mainly assaults)                                                                  | <b>SR Petrone, 2017</b><br><i>Injury, Int. J. Care Injured 45 (2014) 1220–1223</i>                                                     |
| <b>Weiner 2016</b>         | Minor trauma during pregnancy, not associated with adverse pregnancy outcomes, Israel                                         | <b>SR Petrone, 2017</b><br><i>European Journal Of Obstetrics &amp; Gynecology and Reproductive Biology 203 (2016): 78–81</i>           |
| <b>Weiss, 1999</b>         | Retrospect review of death certificates                                                                                       | <i>43rd Annual Proceedings Association for the Advancement of Automotive Medicine September 20-21, 1999. Barcelona (Sitges), Spain</i> |
| <b>Weiss, 2001</b>         | Retrospect review of death certificates                                                                                       | <i>JAMA, 2001. Vol. 286 (15)</i>                                                                                                       |
| <b>Weiss, 2002a</b>        | N/A                                                                                                                           |                                                                                                                                        |
| <b>Zangene, 2015</b>       | 102 cases of trauma in pregnancy registered in Iran from 2007 to 2010. MVC the most frequent (45%)                            | <i>Global Journal of Health Science. 2015. Vol 7 (2)</i>                                                                               |
