# Supplementary material for: Maternal trauma due to motor vehicle crashes and pregnancy outcomes: a systematic review and meta-analysis
Source: PubMed Central journal article supplement — BMJ Open. 2020 Oct 5;10(10):e035562. doi: 10.1136/bmjopen-2019-035562 (PMC7537450; doi:10.1136/bmjopen-2019-035562), 2020-10-05
Supplement: bmjopen-2019-035562supp005.pdf [file bmjopen-2019-035562supp005.pdf]

## Appendix 5. Incidence of maternal, fetal &amp; neonatal complications from single studies

| <b>Outcome</b>                    | <b>Total sample size</b> | <b>Incidence estimate per 1,000 women (95%CI)</b> |
|-----------------------------------|--------------------------|---------------------------------------------------|
| <b>Maternal outcomes</b>          |                          |                                                   |
| Placental problems                | 235329                   | 100.00 (98.79, 101.22)                            |
| Miscarriage                       | 3794                     | 1.85 (0.74, 3.80)                                 |
| Antepartum haemorrhage            | 2022                     | 47.48 (38.62, 57.67)                              |
| Postpartum haemorrhage            | 2022                     | 77.65 (66.35, 90.18)                              |
| Vaginal bleeding                  | 235329                   | 247.00 (245.26, 248.75)                           |
| Hospital stay $\geq 6$ days       | 5936                     | 117.92 (109.82, 126.40)                           |
| Maternal death or hospitalisation | 32810                    | 135.05 (131.37, 138.80)                           |
| <b>Fetal and neonatal</b>         |                          |                                                   |
| Hypoxia                           | 582                      | 22.34 (11.95, 37.89)                              |
| Neonatal death                    | 2270                     | 5.73 (3.05, 9.77)                                 |
| Neonatal transfer                 | 2022                     | 42.53 (34.16, 52.26)                              |
