# Supplementary material for: Maternal trauma due to motor vehicle crashes and pregnancy outcomes: a systematic review and meta-analysis
Source: PubMed Central journal article supplement — BMJ Open. 2020 Oct 5;10(10):e035562. doi: 10.1136/bmjopen-2019-035562 (PMC7537450; doi:10.1136/bmjopen-2019-035562), 2020-10-05
Supplement: bmjopen-2019-035562supp006.pdf [file bmjopen-2019-035562supp006.pdf]

## Appendix 6. Incidence in non-population level data

| <b>Outcome</b>               | <b>Study ID</b>     | <b>Number of events</b> | <b>Group size</b> | <b>Trauma severity level</b> |
|------------------------------|---------------------|-------------------------|-------------------|------------------------------|
| <b>Admission to hospital</b> | Brookfield, 2013    | 182                     | 256               | Not given                    |
|                              | Chibber, 2015       | 648                     | 728               | Not given                    |
| <b>Caesarean delivery</b>    | Chibber, 2015       | 529                     | 728               | Not given                    |
|                              | Luley 2013          | 32                      | 126               | Not given                    |
|                              | Orji, 2002          | 2                       | 84                | Not given                    |
| <b>Fetal death</b>           | Aboutanos, 2007     | 1                       | 148               | Not given                    |
|                              | Chibber, 2015       | 78                      | 728               | Not given                    |
| <b>Fetal distress</b>        | Chibber, 2015       | 412                     | 728               | Not given                    |
| <b>Fetal tachycardia</b>     | Orji, 2002          | 10                      | 84                | Not given                    |
| <b>Hydrops fetalis</b>       | Aboutanos, 2007     | 1                       | 148               | Not given                    |
| <b>Maternal death</b>        | Aboutanos, 2007     | 0                       | 148               | Not given                    |
|                              | Baerga-Varela, 2000 | 1                       | 39                | Severe                       |
|                              | Brookfield, 2013    | 7                       | 256               | Not given                    |
|                              | Chibber, 2015       | 100                     | 728               | Not given                    |
| <b>Maternal death</b>        | Orji, 2002          | 2                       | 84                | Not given                    |
| <b>Miscarriage</b>           | Aboutanos, 2007     | 5                       | 148               | Not given                    |
|                              | Baerga-Varela, 2000 | 7                       | 39                | Mild to severe               |
| <b>Perinatal death</b>       | Baerga-Varela, 2000 | 23                      | 39                | Mild to severe               |
|                              | Luley 2013          | 6                       | 126               | Not given                    |
|                              | Orji, 2002          | 3                       | 84                | Not given                    |
| <b>Placental abruption</b>   | Chibber, 2015       | 428                     | 728               | Not given                    |
|                              | Luley 2013          | 7                       | 126               | Not given                    |
|                              | Orji, 2002          | 1                       | 84                | Not given                    |
| <b>Preterm delivery</b>      | Chibber, 2015       | 97                      | 728               | Not given                    |
| <b>Uterine rupture</b>       | Chibber, 2015       | 12                      | 728               | Not given                    |
|                              | Orji, 2002          | 1                       | 84                | Not given                    |
