# Supplementary figures and images for: Maternal trauma due to motor vehicle crashes and pregnancy outcomes: a systematic review and meta-analysis
Source: PubMed Central journal article supplement — BMJ Open. 2020 Oct 5;10(10):e035562. doi: 10.1136/bmjopen-2019-035562 (PMC7537450; doi:10.1136/bmjopen-2019-035562), 2020-10-05

## maternal outcomes

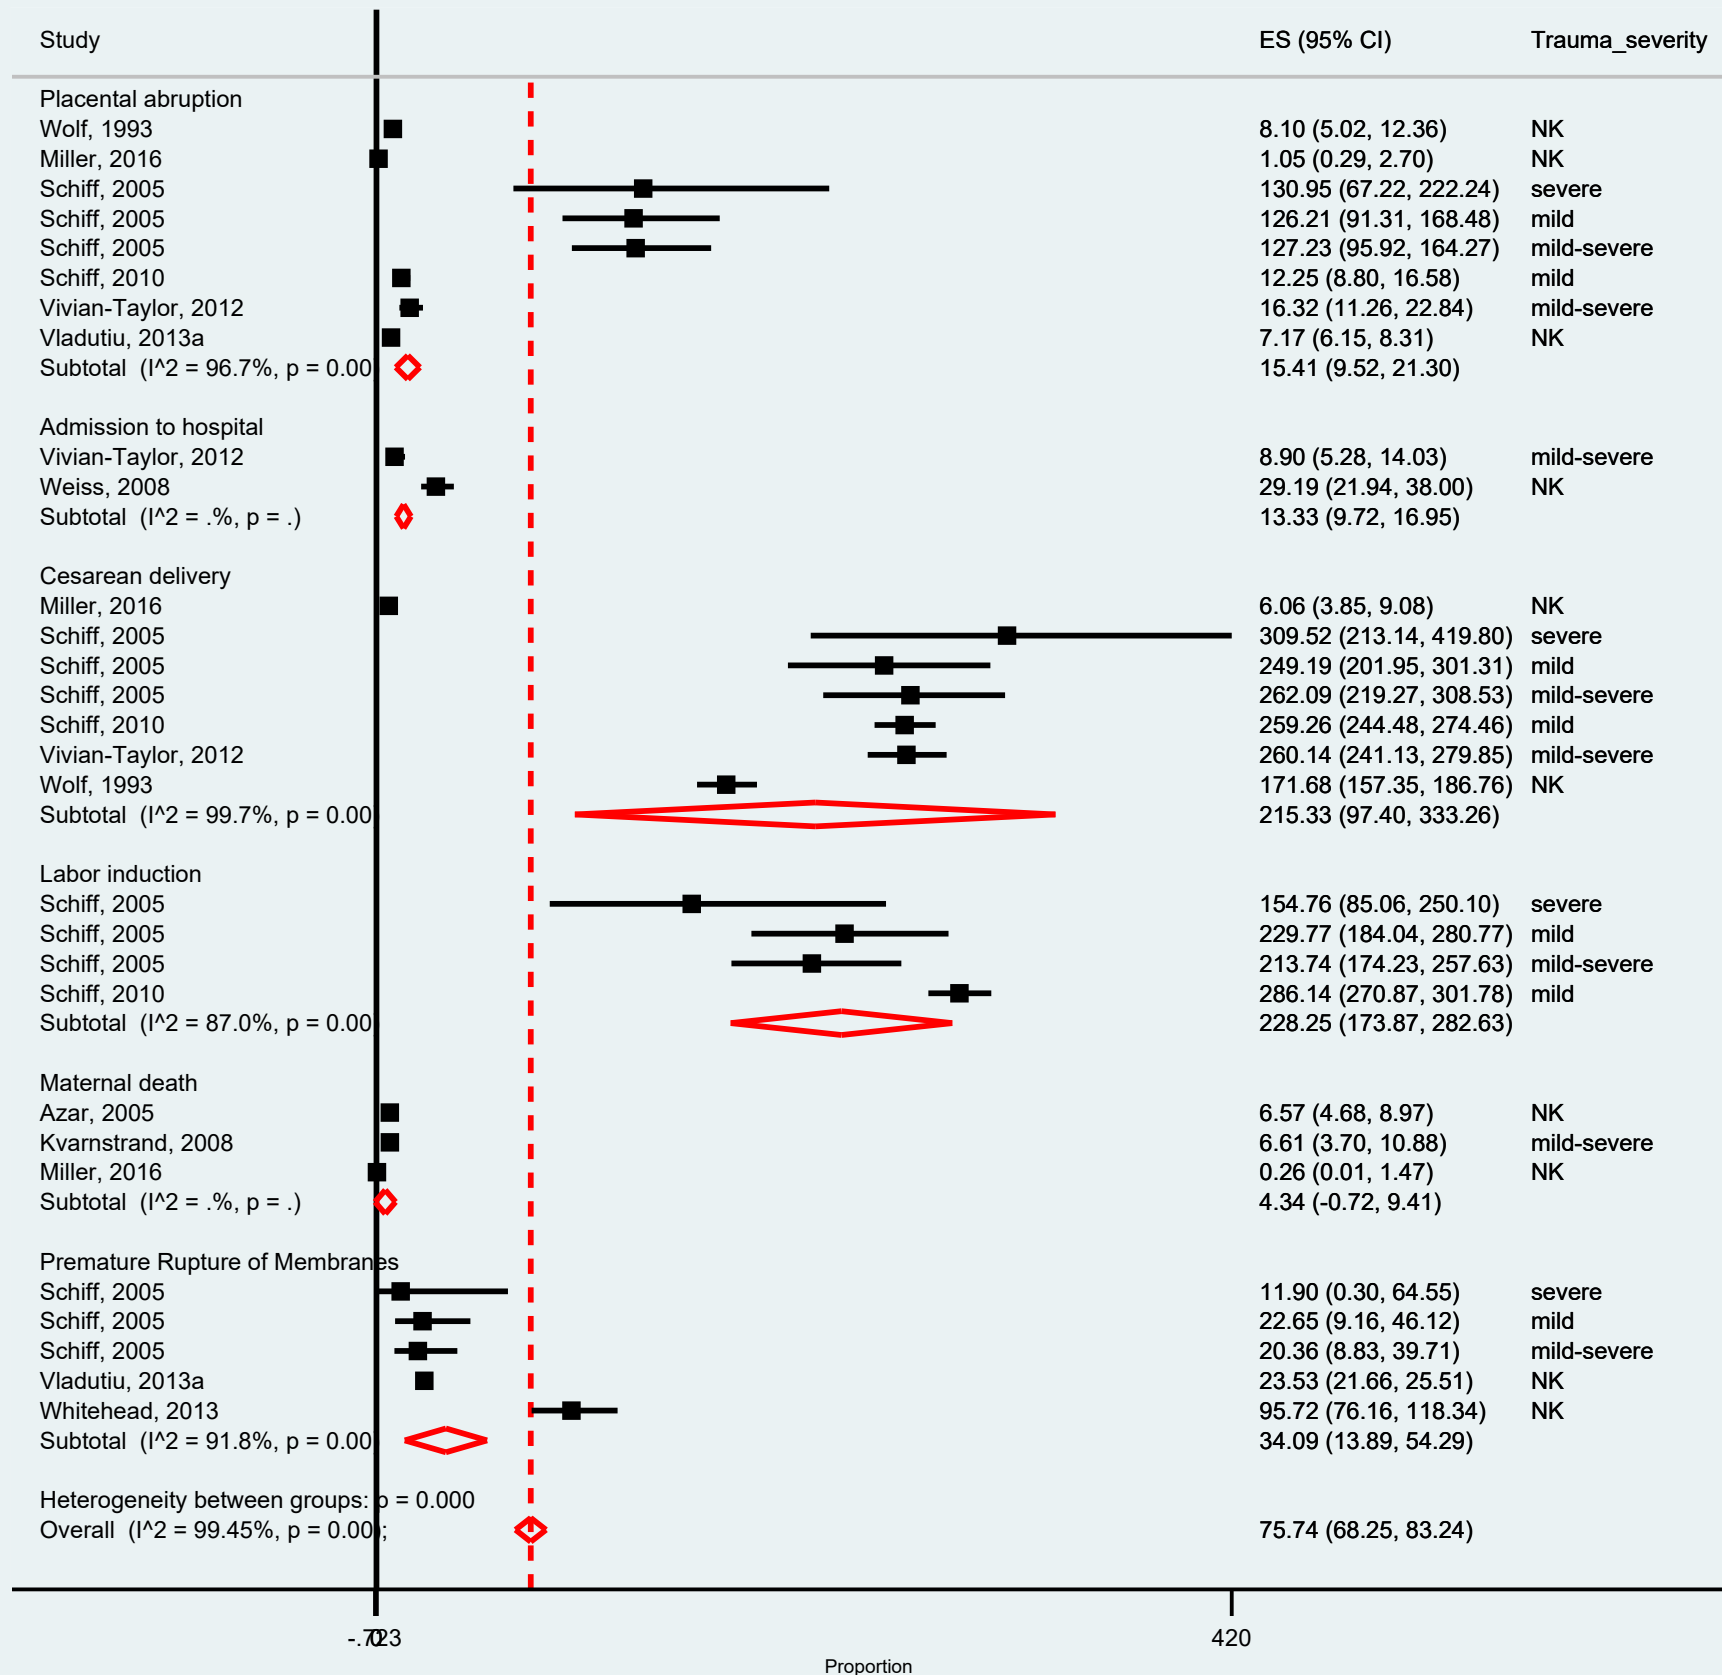

Supplement: bmjopen-2019-035562supp003.pdf [file bmjopen-2019-035562supp003.pdf]

# offspring outcomes

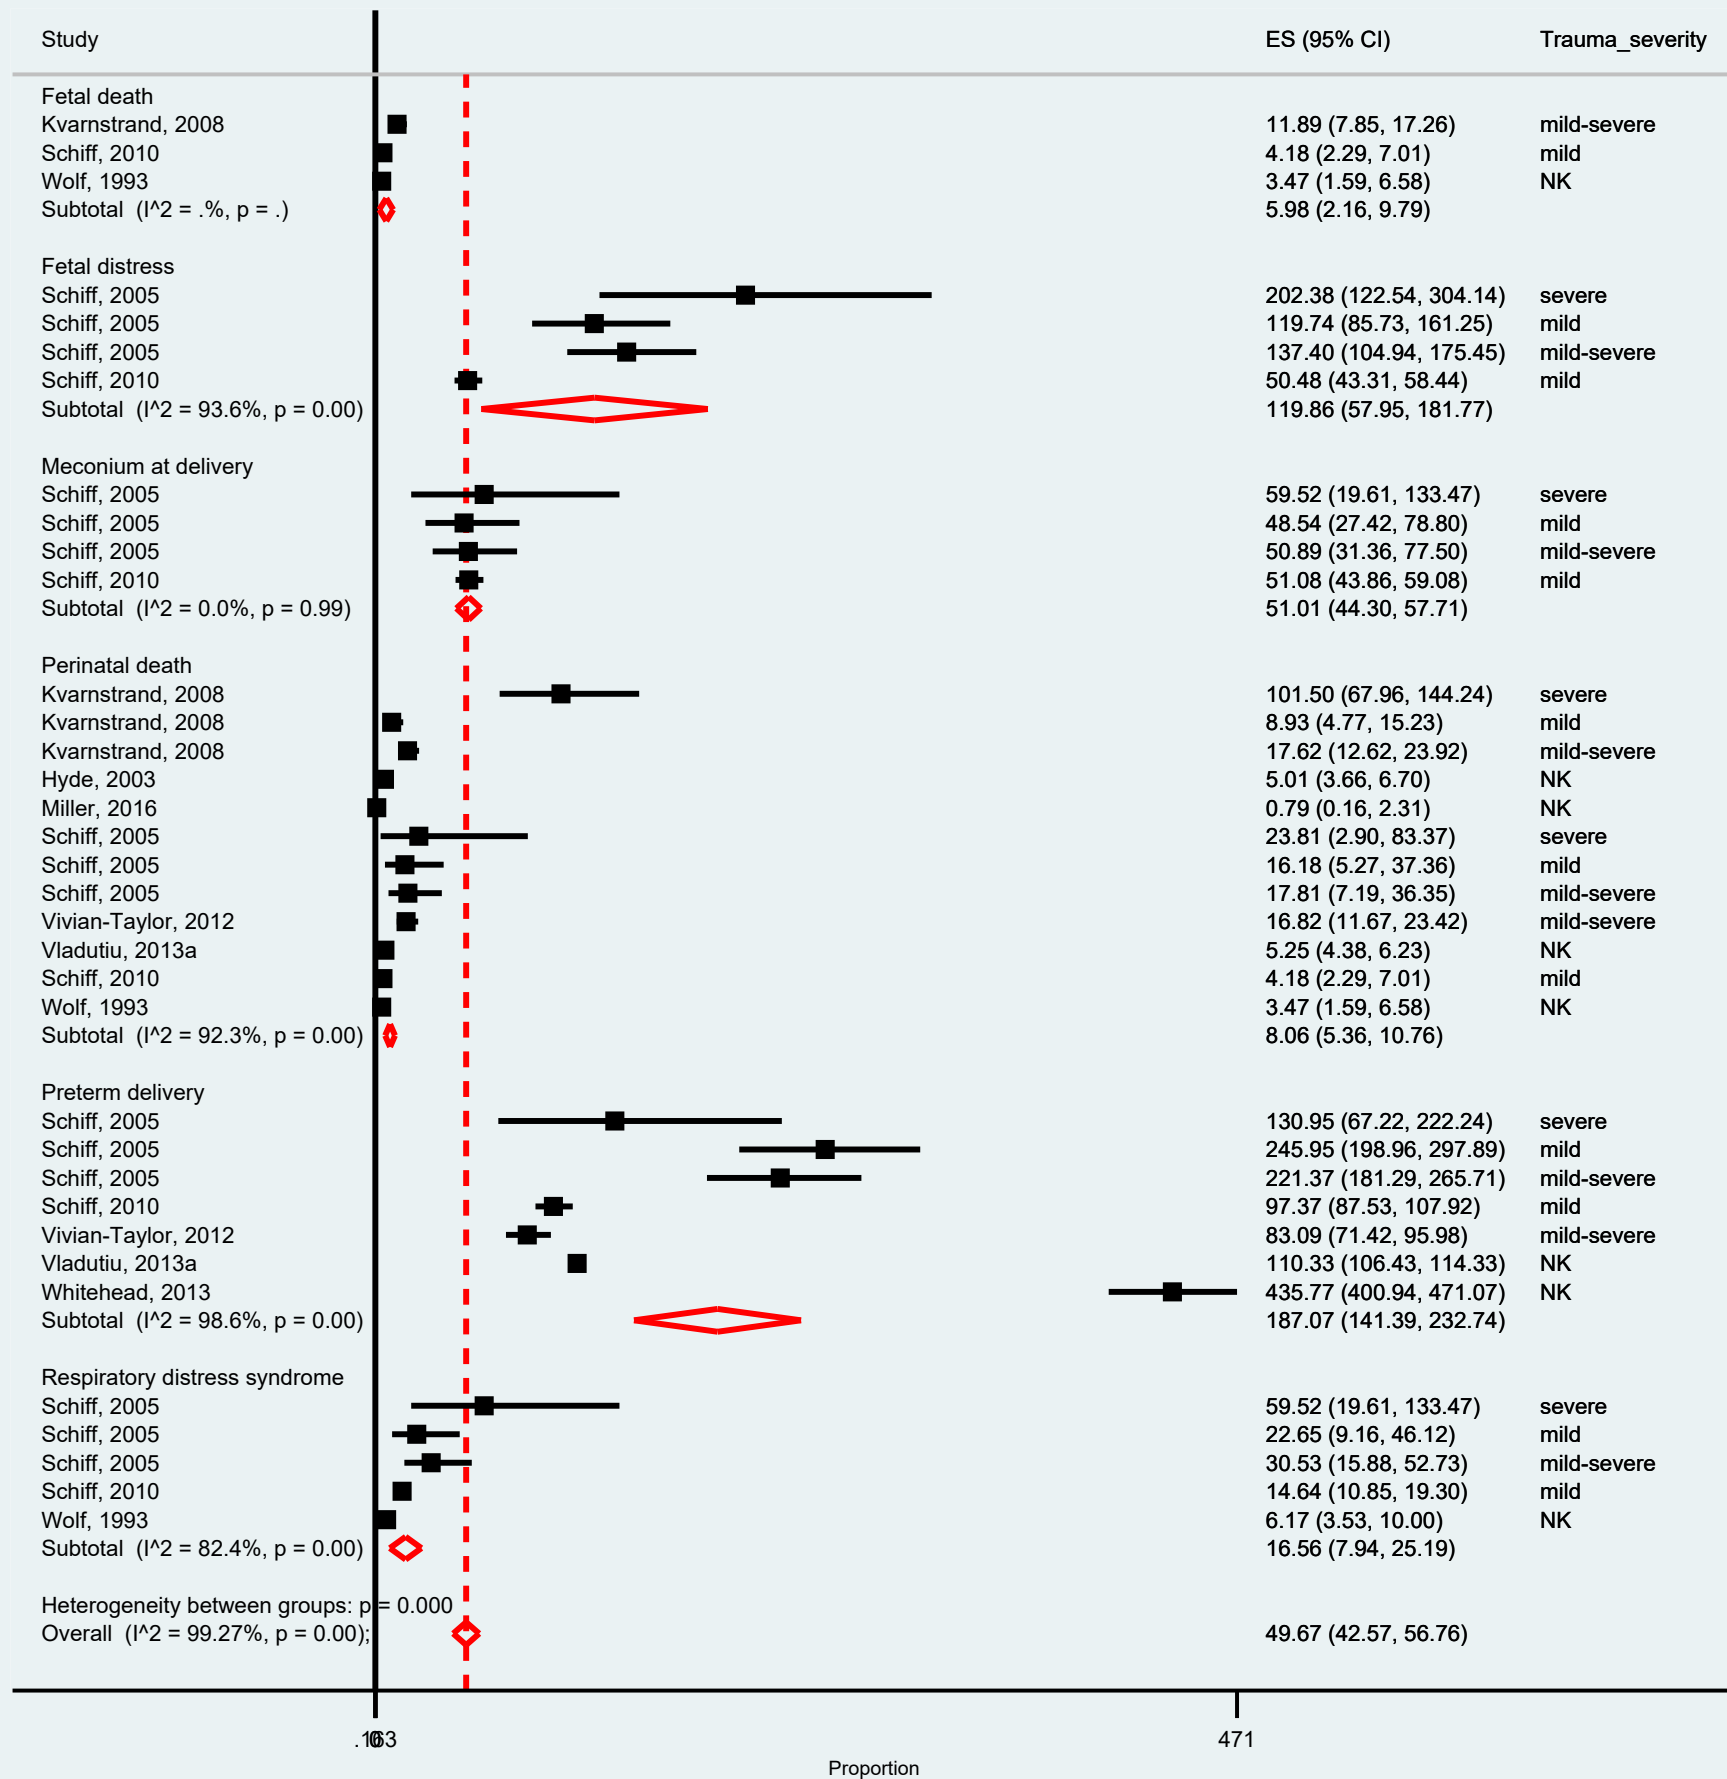

Supplement: bmjopen-2019-035562supp004.pdf [file bmjopen-2019-035562supp004.pdf]

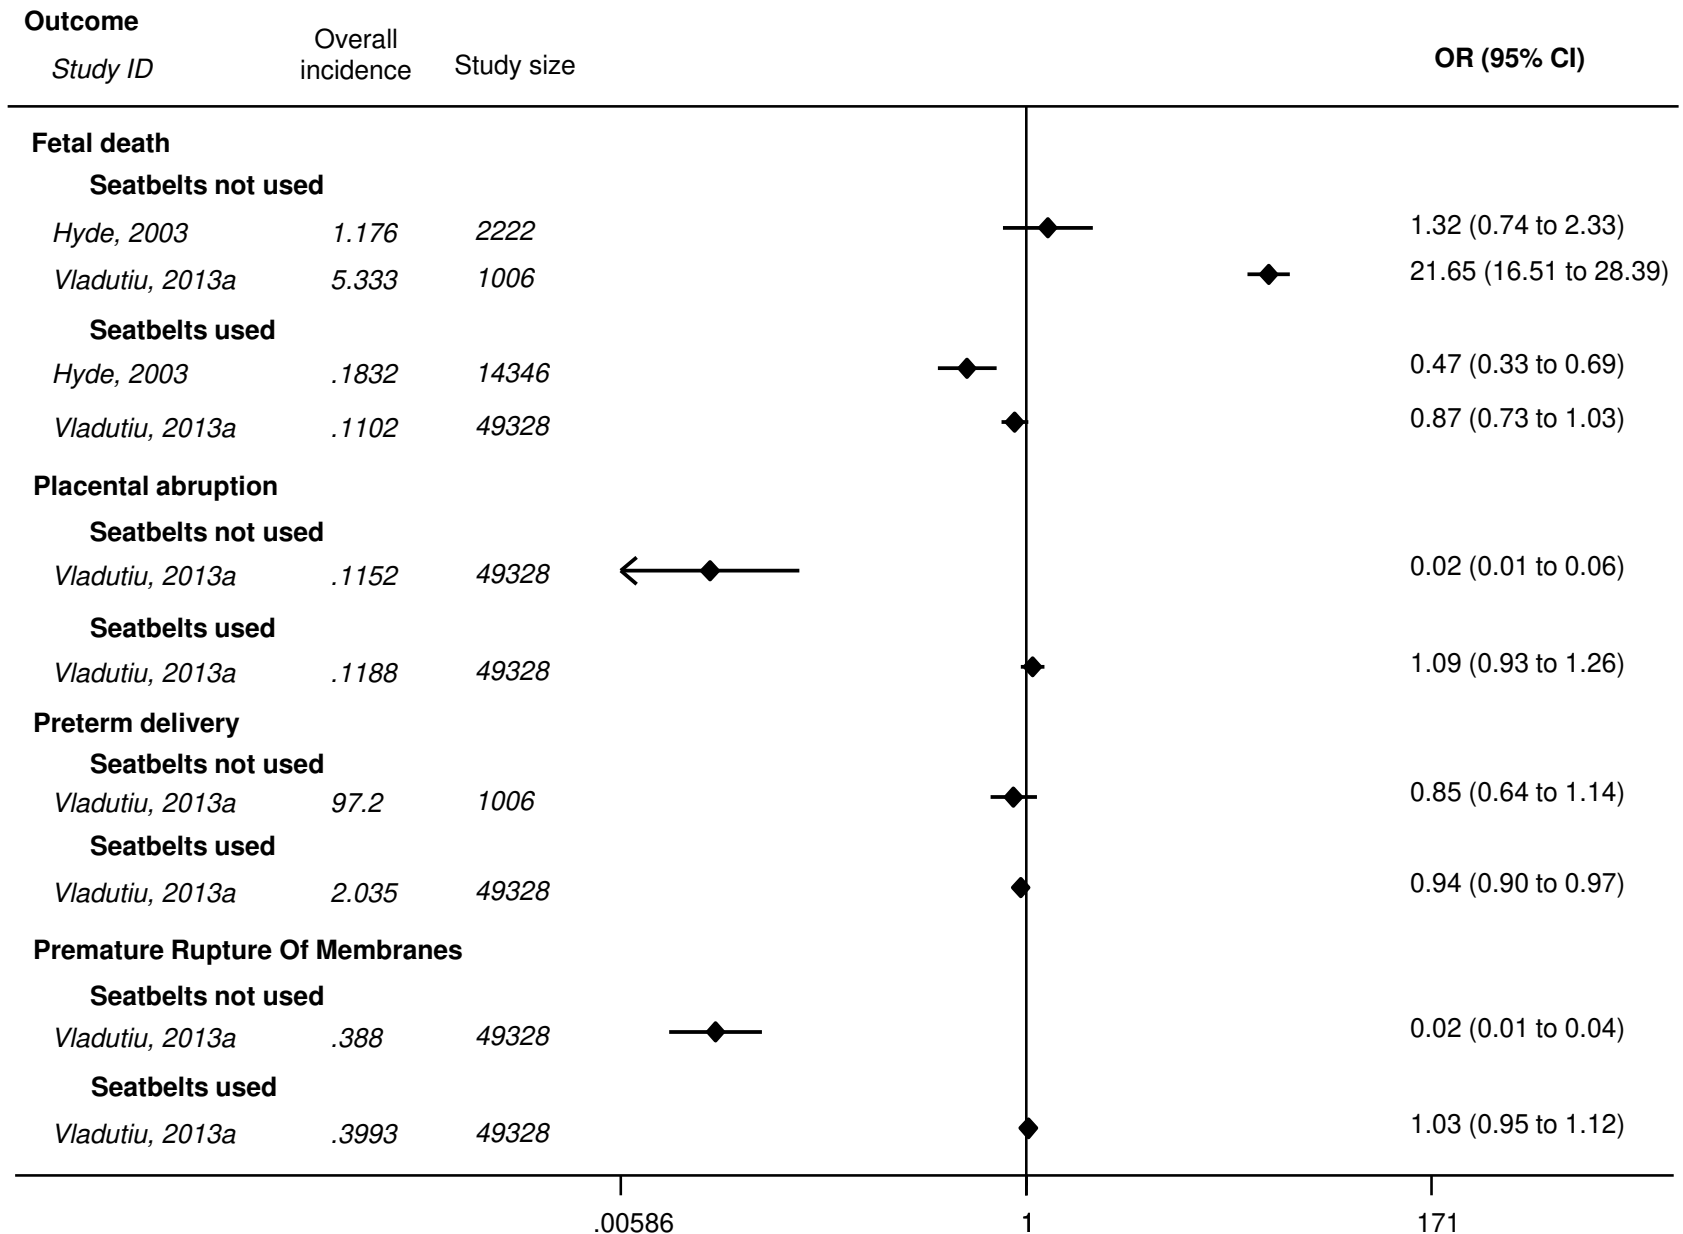

Supplement: bmjopen-2019-035562supp007.pdf [file bmjopen-2019-035562supp007.pdf]

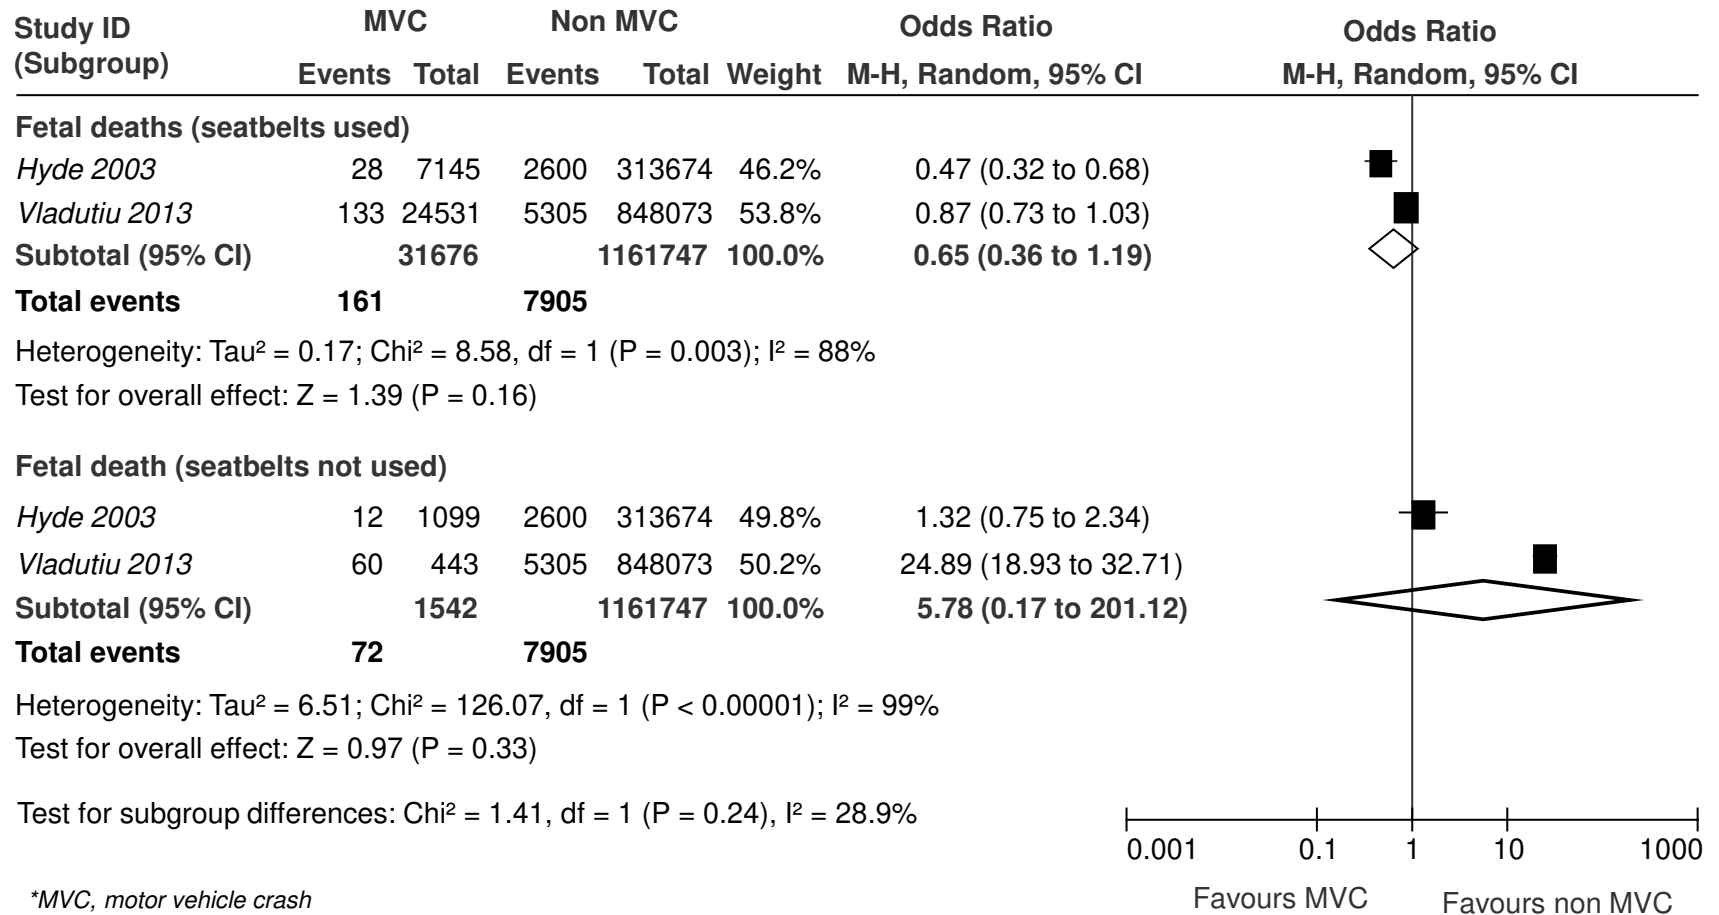

Supplement: bmjopen-2019-035562supp008.pdf [file bmjopen-2019-035562supp008.pdf]
